# Supplementary material for: Cancer Genetic Network Inference Using Gaussian Graphical Models
Source: PubMed Central journal article supplement — Bioinform Biol Insights. 2019 Apr 8;13:1177932219839402. doi: 10.1177/1177932219839402 (PMC6456846; doi:10.1177/1177932219839402), 2019-04-08
Supplement: Table_S1-GeneInteractionsInCancerNetworks_xyz13790ac667df7.pdf [file Table_S1-GeneInteractionsInCancerNetworks_xyz13790ac667df7.pdf]

Table S1-Gene Interactions In Cancer Networks

| Gene Interaction | BLCA     | BRCA     | COAD     | KIRC     | KIRP     | LGG      | LIHC     | LUAD     | LUSC     | PAAD     | PRAD     | SKCM     | STAD     | THCA     | UCEC     |
|------------------|----------|----------|----------|----------|----------|----------|----------|----------|----------|----------|----------|----------|----------|----------|----------|
| BRAF-PIK3CA      | 0        | 0.314319 | 0.76361  | 0.827654 | 0.984052 | 1.034364 | 0.244118 | 0.313065 | 0.360177 | 0.618554 | 0.58924  | 0.450249 | 1.113763 | 0        | 0.251891 |
| HRAS-MAP2K2      | 0.727919 | 0.233596 | 0.416908 | 0.679279 | 0.561394 | 0.942012 | 0        | 0.426186 | 0.27231  | 0        | 0.925564 | 0        | 0.242914 | 1.071146 | 0        |
| PIK3CA-SOS1      | 0        | 0.546518 | 0.917109 | 0.495761 | 0.649995 | 0.796405 | 0.204198 | 0.655836 | 0.348315 | 0        | 0.925096 | 0        | 0.448085 | 0        | 0.634719 |
| E2F1-E2F2        | 0.785634 | 1.373568 | 0        | 0        | 0        | 0.691712 | 1.127917 | 1.121593 | 0.899765 | 0.563442 | 1.494068 | 1.003915 | 0.838268 | 0        | 0        |
| PIK3CA-PIK3CB    | 0        | 0.323032 | 0.692419 | 0.309271 | 0.357227 | 0        | 0.503742 | 0.687405 | 0        | 0        | 0.264905 | 0.845847 | 0.973355 | 0        | 0        |
| BAD-MAP2K2       | 0        | 0        | 0.628818 | 0.959173 | 1.764856 | 0        | 0.533536 | 0.78368  | 0.26837  | 0        | 1.60303  | 1.328064 | 0        | 0        | 0.699319 |
| MAP2K2-PIK3R2    | 0        | 0.636257 | 0        | 0.479111 | 0.879749 | 0.513855 | 0.464062 | 0.962796 | 0.776803 | 0        | 0        | 1.506865 | 0.386609 | 0        | 0        |
| BAX-DDB2         | 0        | 0        | 0.493453 | 0        | 0        | 0.507666 | 0.945356 | 0.324797 | 0        | 0.448893 | 0        | 0.375922 | 0.406586 | 0.94193  | 0.250067 |
| CDKN1A-DDB2      | 0        | 0.723011 | 0.591515 | 0        | 0        | 0.295522 | 0.555519 | 0.405487 | 0        | 0        | 0        | 0.235012 | 0.508776 | 0.534802 | 0.34457  |
| HRAS-MAPK1       | 0.619128 | 0.472657 | 0.350873 | 0        | 0.494772 | 0        | 0.563431 | 0.449914 | 0        | 0        | 0.276734 | 0.233818 | 0        | 0        | 0.623723 |
| PIK3R1-POLK      | 0        | 0.489178 | 0.606581 | 0        | 0        | 0        | 0.525021 | 0.784891 | 0.248774 | 0.419599 | 0        | 0.916277 | 0        | 0        | 0.286824 |
| BAD-HRAS         | 0        | 0.491070 | 0        | 0.915383 | 0.631553 | 0        | 0.995368 | 0.313801 | 0.311328 | 0        | 1.88843  | 0.426257 | 0        | 0        | 0.409125 |
| MAP2K1-MAPK1     | 0.648146 | 0.477567 | 0.488537 | 0        | 0        | 0.602448 | 0.250478 | 0        | 0        | 0        | 0.777271 | 0        | 0        | 0.339641 | 0.455891 |
| AKT3-PIK3CA      | 0        | 0        | 0.54217  | 0.238337 | 0.2238   | 0.380286 | 0        | 0.216227 | 0        | 0.692663 | 0        | 0.470286 | 0.491766 | 0        | 0        |
| GADD45A-GADD45B  | 0        | 0.208133 | 0.257749 | 0        | 0        | 0.606602 | 0.288826 | 0.226717 | 0        | 0.328103 | 0        | 0        | 0.389924 | 0        | 0        |
| GRB2-PIK3CD      | 0        | 0.25625  | 0.483767 | 0.748854 | 0.416894 | 0.3763   | 0        | 0.319066 | 0        | 0        | 0        | 0        | 0.448263 | 0        | 0        |
| CDK4-E2F1        | 0.461789 | 0.317222 | 0        | 0        | 0        | 0        | 0.267823 | 0.261198 | 0.252958 | 0.223484 | 0        | 0.253111 | 0        | 0        | 0        |
| POLK-RB1         | 0        | 0.488833 | 0        | 0        | 0        | 0.255936 | 0.269769 | 0.308361 | 0.299201 | 0.316001 | 0        | 0.411508 | 0        | 0        | 0        |
| SOS1-SOS2        | 0        | 0        | 0.224236 | 0        | 0        | 0.606004 | 0.539058 | 0.52011  | 0        | 0        | 0.525427 | 0        | 0.780799 | 0        | 0.426924 |
| ARAF-E2F3        | 0.351327 | 0.508421 | 0        | 0        | 0        | 0.464409 | 0.458145 | 0        | 0        | 0.255898 | 0.297364 | 0.228022 | 0        | 0        | 0        |
| BAD-SOS1         | 0        | 0        | 0.969381 | 0.661426 | 0        | 0        | 0        | 0.723888 | 0.511338 | 0        | 0.362463 | 0        | 0        | 0        | 0.336964 |
| GSK3B-PIK3CA     | 0        | 0.528704 | 0.369141 | 0        | 0        | 0        | 0.767188 | 0        | 0        | 0        | 0.27133  | 0        | 0.663346 | 0        | 0.746399 |
| MAPK1-NRAS       | 0.519326 | 0        | 0.254052 | 0.263171 | 0        | 0        | 0.435192 | 0        | 0        | 0.296068 | 0        | 0        | 0.206779 | 0        | 0        |
| HRAS-SOS2        | 0        | 0.426496 | 0.508513 | 0        | 0        | 0.222081 | 0.319057 | 0        | 0.408264 | 0        | 0.218982 | 0        | 0        | 0        | 0        |
| BRAF-HRAS        | 0        | 0        | 0        | 0        | 0.282227 | 0.49683  | 0        | 0.338122 | 0        | 0        | 0.280611 | 0.468948 | 0.75593  | 0        | 0        |
| CDKN1A-GADD45B   | 0        | 0        | 0        | 0        | 0        | 0.361787 | 0        | 0.45748  | 0.431545 | 0.510213 | 0        | 0        | 0.287829 | 0.205602 | 0        |
| CDKN1A-GADD45A   | 0        | 0.254376 | 0.438033 | 0        | 0        | 0        | 0.298706 | 0.521175 | 0.204209 | 0        | 0.236931 | 0        | 0        | 0        | 0        |
| BAX-MAP2K2       | 0        | 0.625074 | 0        | 0        | 0        | 0.595445 | 0        | 0.627526 | 0        | 0        | 0        | 0        | 0.756485 | 0.255478 | 0.447602 |
| BAX-PIK3CA       | 0        | 0        | 0.287096 | 0        | 0        | 0.36778  | 0.230169 | 0        | 0.43971  | 0.288357 | 0        | 0.697268 | 0        | 0        | 0        |
| PIK3R1-PIK3R3    | 0        | 0.393828 | 0.220989 | 0        | 0        | 0        | 0.33515  | 0.317894 | 0.268165 | 0.218904 | 0        | 0        | 0        | 0        | 0        |
| KRAS-MAP2K2      | 0.354301 | 0.32002  | 0        | 0.276244 | 0.568201 | 0        | 0        | 0        | 0        | 0        | 0.662049 | 0.412074 | 0        | 0        | 0        |
| BAD-KRAS         | 0        | 0        | 0        | 0.572988 | 0        | 0        | 0.51028  | 0.316746 | 0        | 0        | 0.223856 | 0.698984 | 0        | 0        | 0        |
| MTOR-PIK3R3      | 0        | 0.346002 | 0.468408 | 0        | 0        | 0.347099 | 0        | 0        | 0        | 0.522179 | 0        | 0        | 0.43356  | 0        | 0        |
| GADD45B-MAP2K2   | 0        | 0.480846 | 0        | 0        | 0        | 0        | 0.212957 | 0.31393  | 0        | 0        | 0        | 0.619712 | 0        | 0        | 0.32657  |
| PIK3R1-SOS2      | 0        | 0.253144 | 0        | 0        | 0        | 0.257787 | 0.425173 | 0.44925  | 0        | 0        | 0.320062 | 0        | 0        | 0        | 0        |
| BAX-CDKN1A       | 0        | 0.522995 | 0.329806 | 0        | 0        | 0        | 0        | 0        | 0        | 0        | 0.423491 | 0        | 0.718131 | 0.21721  | 0        |
| MAPK1-MTOR       | 0        | 0.321159 | 0.415867 | 0        | 0        | 0.265461 | 0        | 0        | 0.366723 | 0        | 0        | 0.461554 | 0        | 0        | 0        |
| MAPK1-PIK3CA     | 0        | 0        | 0        | 0        | 0        | 0        | 0.823106 | 0.210061 | 0.310207 | 0.288744 | 0.822014 | 0        | 0        | 0        | 0        |
| GSK3B-PIK3CB     | 0        | 1.570369 | 0.729404 | 0        | 0        | 1.298824 | 0        | 0        | 0        | 0        | 0        | 0        | 1.344179 | 0        | 0.300268 |
| HRAS-SOS1        | 0        | 0.449161 | 0.440148 | 0        | 0        | 0.878197 | 0        | 0        | 0        | 0        | 0.257616 | 0        | 0        | 0        | 0.350521 |
| GADD45B-GADD45A  | 0        | 0        | 0.207765 | 0        | 0        | 0.309795 | 0        | 0        | 0        | 0        | 0.431299 | 0.286882 | 0.398972 | 0        | 0        |
| BAK1-CDKN1A      | 0        | 0        | 0.409792 | 0        | 0        | 0        | 0        | 0.25663  | 0.477893 | 0.364448 | 0        | 0        | 0.348423 | 0        | 0        |
| AKT2-BAX         | 0        | 0.485189 | 0        | 0        | 0        | 0.507073 | 0        | 0.578859 | 0        | 0        | 0        | 0.339271 | 0.616878 | 0        | 0        |
| BAD-MAPK3        | 0        | 0        | 0.340022 | 0.224409 | 0        | 0        | 0        | 0.310282 | 0        | 0        | 0.259024 | 0.335629 | 0        | 0        | 0        |
| HRAS-KRAS        | 0.387727 | 0.210509 | 0        | 0        | 0        | 0.484024 | 0        | 0        | 0        | 0        | 0.318813 | 0        | 0        | 0        | 0.345467 |
| MAP2K2-PIK3CA    | 0        | 0.294209 | 0        | 0        | 0        | 0        | 0.633203 | 0        | 0        | 0        | 0.696424 | 0        | 0.36391  | 0        | 0.419    |
| HRAS-PIK3CA      | 0        | 0        | 0        | 0.275817 | 0        | 0.301589 | 0        | 0.214177 | 0        | 0        | 0.26963  | 0.395819 | 0        | 0        | 0        |
| TGFB1-TGFB3      | 0        | 0        | 0.240604 | 0.469545 | 0.238197 | 0        | 0        | 0        | 0.404235 | 0        | 0        | 0.457977 | 0        | 0        | 0        |
| E2F3-MAPK3       | 0        | 0.351422 | 0        | 0        | 0        | 0.219925 | 0        | 0.426269 | 0        | 0        | 0        | 0.673448 | 0.589398 | 0        | 0        |
| E2F1-RB1         | 0        | 0.44766  | 0        | 0        | 0        | 0.2122   | 0        | 0.256778 | 0.333743 | 0.213078 | 0        | 0        | 0        | 0        | 0        |
| PIK3CA-SOS2      | 0        | 0        | 0.325073 | 0.822305 | 0        | 0        | 0.387255 | 0        | 0        | 0.922296 | 0        | 0        | 0        | 0        | 0.216469 |
| HRAS-POLK        | 0        | 0        | 0.520914 | 0        | 0        | 0.705809 | 0        | 0.326045 | 0.461666 | 0        | 0        | 0        | 0.884691 | 0        | 0        |
| DDB2-HRAS        | 0        | 0.345302 | 0        | 0        | 0        | 0        | 0        | 0.481526 | 0        | 0        | 0        | 0.663512 | 0        | 0.562935 | 0        |
| PIK3CA-RB1       | 0        | 0        | 0        | 0        | 0        | 0.2137   | 0        | 0        | 0        | 0        | 0.213207 | 0.438422 | 0.290319 | 0        | 0        |
| APC-SOS1         | 0        | 0.24267  | 0        | 0        | 0        | 0        | 0.270277 | 0        | 0        | 0        | 0        | 0        | 0.690096 | 0        | 0.376551 |
| HRAS-RPS6KB2     | 0        | 0.233586 | 0.243719 | 0        | 0        | 0.499769 | 0        | 0        | 0        | 0        | 0        | 0        | 0.829586 | 0        | 0        |
| PIK3R1-SOS1      | 0        | 0        | 0.447812 | 0        | 0        | 0.245106 | 0        | 0        | 0        | 0.711693 | 0        | 0        | 0.409805 | 0        | 0        |
| EGFR-MTOR        | 0        | 0.227055 | 0.594409 | 0        | 0        | 0.226831 | 0        | 0        | 0        | 0.234177 | 0        | 0        | 0        | 0        | 0        |
| BAX-SOS1         | 0        | 0.222484 | 0        | 0        | 0        | 0        | 0.407829 | 0        | 0        | 0        | 0        | 0        | 0.423523 | 0        | 0.607524 |
| KRAS-PIK3CA      | 0        | 0        | 0.404727 | 0        | 0        | 0        | 0        | 0.280526 | 0        | 0        | 0.285597 | 0        | 0        | 0        | 0.256221 |
| MAPK1-PIK3CB     | 0        | 0        | 0        | 0.322755 | 0.888446 | 0        | 0        | 0        | 0        | 0.524799 | 0.246782 | 0        | 0        | 0        | 0        |
| E2F2-E2F3        | 0        | 0.209261 | 0        | 0        | 0        | 0.468485 | 0        | 0.672935 | 0        | 0        | 0        | 0.270317 | 0        | 0        | 0        |
| BAK1-NRAS        | 0        | 0.220434 | 0        | 0        | 0        | 0        | 0.203328 | 0        | 0.320522 | 0        | 0        | 0        | 0        | 0        | 0.200274 |
| CTN1B-MAPK1      | 0        | 0.273352 | 0        | 0        | 0        | 0        | 0        | 0        | 0        | 0        | 0        | 0        | 0.281806 | 0.485703 | 0.303323 |
| BAX-POLK         | 0        | 0        | 0        | 0        | 0        | 0.280049 | 0        | 0        | 0.551135 | 0        | 0        | 0        | 0.219166 | 0.336216 | 0        |
| AKT1-POLK        | 0        | 0        | 0.433209 | 0        | 0        | 0        | 0        | 0.291606 | 0.603108 | 0        | 0        | 0        | 0.286993 | 0        | 0        |
| SMAD2-SMAD4      | 0        | 0        | 0.445958 | 0        | 0        | 1.694154 | 0        | 0.977638 | 0        | 0        | 0        | 0        | 0.240868 | 0        | 0        |
| APC-POLK         | 0        | 2.490624 | 0        | 0        | 0        | 1.362216 | 0        | 0        | 0        | 0        | 0        | 0        | 0.696434 | 0        | 1.002007 |
| E2F2-PIK3CD      | 0        | 0        | 0        | 0        | 0        | 0        | 0        | 0        | 0.324226 | 0.236191 | 0.299406 | 0.21071  | 0        | 0        | 0        |
| EGFR-PIK3CA      | 0        | 0        | 0.539613 | 0        | 0        | 0.213244 | 0        | 0        | 0.512667 | 0.786511 | 0        | 0        | 0        | 0        | 0        |
| MAP2K2-POLK      | 0        | 0.536311 | 0        | 0        | 0.912472 | 0        | 0        | 0.437528 | 0        | 0        | 0        | 0        | 0        | 0.538091 | 0        |
| NRAS-PIK3CA      | 0        | 0        | 0        | 0        | 0        | 0        | 0        | 0.272536 | 0        | 0.234674 | 0.415514 | 0        | 0        | 0        | 0.446625 |
| PIK3R2-PIK3R3    | 0        | 0.419683 | 0        | 0        | 0        | 0        | 0        | 0.273446 | 0.207384 | 0        | 0        | 0        | 0        | 0        | 0.273329 |
| PIK3CA-TGFB2     | 0        | 0        | 0.356583 | 0        | 0        | 0        | 0.297887 | 0        | 0        | 0.371988 | 0        | 0        | 0.315706 | 0        | 0        |
| PIK3CD-PRKCB     | 0        | 0        | 0        | 0        | 0.235979 | 1.542417 | 0.339572 | 0.276718 | 0        | 0        | 0        | 0        | 0        | 0        | 0        |

|                |          |          |          |          |          |          |          |          |          |          |          |          |          |          |          |          |
|----------------|----------|----------|----------|----------|----------|----------|----------|----------|----------|----------|----------|----------|----------|----------|----------|----------|
| AXIN1-MAPK3    | 0        | 0.956683 | 0.503719 | 0        | 0        | 0        | 0.541102 | 0        | 0        | 0        | 0        | 0        | 0.263365 | 0        | 0        | 0        |
| BAX-PIK3CB     | 0        | 0.257328 | 0        | 0        | 0        | 0.422302 | 0        | 0.210966 | 0        | 0        | 0        | 0.292502 | 0        | 0        | 0        | 0        |
| BAX-MAPK1      | 0        | 0.499109 | 0        | 0        | 0        | 0.456823 | 0.362511 | 0        | 0        | 0        | 0        | 0        | 0.406418 | 0        | 0        | 0        |
| GADD45G-NRAS   | 0        | 0        | 0        | 0        | 0        | 0        | 0.279441 | 0.340462 | 0.228939 | 0        | 0        | 0        | 0.322331 | 0        | 0        | 0        |
| BAX-HRAS       | 0        | 0.407976 | 0        | 0        | 0        | 0        | 0.225576 | 0.547573 | 0        | 0        | 0        | 0        | 0        | 0        | 0.743278 | 0        |
| E2F3-SOS1      | 0        | 0.744829 | 0        | 0        | 0        | 0.246443 | 0        | 0.516021 | 0.429768 | 0        | 0        | 0        | 0        | 0        | 0        | 0        |
| ARAF-MAPK3     | 0        | 0        | 0.248041 | 0        | 0        | 0        | 0        | 0.247009 | 0        | 0        | 0        | 0.655583 | 0.370954 | 0        | 0        | 0        |
| GAB1-SOS1      | 0        | 0        | 0        | 0.421634 | 0.222471 | 0        | 0.406835 | 0        | 0        | 0        | 0        | 0        | 0.451963 | 0        | 0        | 0        |
| BRAF-SOS2      | 0        | 0.393662 | 0        | 0.310812 | 0.774729 | 0        | 0        | 0        | 0        | 0        | 0        | 0        | 0        | 0        | 0        | 0.438567 |
| CTNNB1-HRAS    | 0        | 0        | 0.286557 | 0        | 0        | 0        | 0.212531 | 0        | 0        | 0        | 0.448909 | 0        | 0        | 0        | 0.434188 | 0        |
| PIK3CA-POLK    | 0        | 0        | 0        | 0        | 0        | 0        | 0.352231 | 0        | 0        | 0.277258 | 0        | 1.04513  | 0.392828 | 0        | 0        | 0        |
| BRAF-MAPK1     | 0        | 0        | 0        | 0.275932 | 0.272639 | 0        | 0        | 0.238549 | 0        | 0        | 0        | 0        | 0.828362 | 0        | 0        | 0        |
| BRAF-EGFR      | 0        | 0        | 0.824431 | 0        | 0        | 0        | 0.314071 | 0        | 0        | 0.315818 | 0.257182 | 0        | 0        | 0        | 0        | 0        |
| AXIN1-DVL1     | 0        | 0.966619 | 0        | 0        | 0        | 0        | 0.233835 | 0        | 0        | 0        | 0        | 0        | 0.359438 | 0        | 0        | 0        |
| BRAF-RAF1      | 0.239265 | 0.280645 | 0        | 0        | 0        | 0        | 0        | 0        | 0        | 0        | 0        | 0        | 0.337526 | 0        | 0        | 0        |
| POLK-SOS2      | 0        | 0.564535 | 0        | 0        | 0        | 0        | 0.309052 | 0        | 0        | 0        | 0        | 0        | 0.438317 | 0        | 0        | 0        |
| AKT3-TGFB2     | 0        | 0        | 0.288111 | 0        | 0        | 0        | 0        | 0        | 0        | 0.298378 | 0        | 0        | 0.202666 | 0        | 0        | 0        |
| BAD-GADD45G    | 0        | 0        | 0.265685 | 0        | 0        | 0        | 0        | 0        | 0.310986 | 0        | 0        | 0        | 0        | 0        | 0.307405 | 0        |
| NRAS-RXR       | 0        | 0        | 0        | 0        | 0        | 0        | 0        | 0.318291 | 0.216507 | 0        | 0        | 0        | 0.444251 | 0        | 0        | 0        |
| KRAS-PIK3R3    | 0        | 0        | 0        | 0        | 0        | 0        | 0        | 0.267262 | 0        | 0.265963 | 0.22442  | 0        | 0        | 0        | 0        | 0        |
| E2F1-RPS6KB2   | 0        | 0.518246 | 0        | 0        | 0        | 0        | 0.262004 | 0        | 0        | 0        | 0        | 0        | 0.461807 | 0        | 0        | 0        |
| PDGFB-PDGFRB   | 0        | 0        | 0        | 0        | 0        | 0.505082 | 0        | 0        | 0        | 0        | 1.395334 | 0.82184  | 0        | 0        | 0        | 0        |
| MAPK1-RB1      | 0.213123 | 0        | 0        | 0        | 0        | 0        | 0.341056 | 0        | 0        | 0        | 0.598154 | 0        | 0        | 0        | 0        | 0        |
| AKT1-HRAS      | 0        | 0.508121 | 0        | 0        | 0        | 0        | 0        | 0.292304 | 0        | 0        | 0        | 0        | 0.521191 | 0        | 0        | 0        |
| APC-PIK3CA     | 0        | 0.656619 | 0        | 0        | 0        | 0        | 0.431229 | 0        | 0        | 0        | 0        | 0        | 0.219835 | 0        | 0        | 0        |
| BAX-SOS2       | 0        | 0.359807 | 0        | 0        | 0        | 0        | 0        | 0        | 0        | 0        | 0        | 0        | 0.242559 | 0        | 0.277983 | 0        |
| GSK3B-SOS2     | 0        | 0.753019 | 0        | 0        | 0        | 0        | 0        | 0        | 0        | 0.468708 | 0        | 0        | 0        | 0        | 0.413418 | 0        |
| DVL3-PIK3R2    | 0        | 0.557311 | 0        | 0        | 0        | 0        | 0.639076 | 0        | 0        | 0        | 0        | 0        | 0.235542 | 0        | 0        | 0        |
| DVL1-MTOR      | 0        | 1.474212 | 0        | 0        | 0        | 0        | 0.796464 | 0        | 0        | 0        | 0        | 0        | 0.708976 | 0        | 0        | 0        |
| FOXO3-PDPK1    | 0        | 0        | 0        | 0        | 0        | 0        | 0        | 0.663266 | 0.381192 | 0        | 0        | 0        | 0        | 0        | 0.309719 | 0        |
| APC-RPS6KB1    | 0        | 0.234425 | 0        | 0        | 0.34297  | 0        | 0        | 0        | 0        | 0        | 0        | 0        | 0.260699 | 0        | 0        | 0        |
| E2F2-MTOR      | 0        | 0.738886 | 0        | 0        | 0        | 0        | 0        | 0        | 0        | 0.232965 | 0        | 0        | 0.89171  | 0        | 0        | 0        |
| E2F3-GSK3B     | 0        | 0.493821 | 0        | 0        | 0        | 0        | 0        | 0        | 0        | 0        | 0.271733 | 0        | 0.358925 | 0        | 0        | 0        |
| LRP5-RPS6KB2   | 0        | 0.818052 | 0        | 0        | 0        | 0        | 1.126545 | 0        | 0        | 0        | 0        | 0        | 0.767925 | 0        | 0        | 0        |
| GSK3B-PIK3R1   | 0        | 0        | 0.612142 | 0        | 0        | 0        | 0.340129 | 0        | 0        | 0        | 0        | 0        | 0.203144 | 0        | 0        | 0        |
| MTOR-SOS1      | 0        | 0.399315 | 0.451478 | 0        | 0        | 0        | 0        | 0        | 0        | 0        | 0        | 0        | 0.443654 | 0        | 0        | 0        |
| CREBBP-EP300   | 0        | 0        | 0        | 1.498428 | 1.102949 | 0        | 0        | 0        | 0        | 0        | 1.633514 | 0        | 0        | 0        | 0        | 0        |
| MAP2K2-PDPK1   | 0        | 0        | 0        | 0        | 0        | 0        | 0        | 0.235708 | 0        | 0.293172 | 0        | 0        | 0        | 0        | 0.590056 | 0        |
| FRAT1-FRAT2    | 0        | 2.492839 | 0        | 0        | 0        | 0        | 2.399588 | 0        | 0        | 0        | 0        | 0        | 1.787804 | 0        | 0        | 0        |
| DVL3-TCF7L1    | 0        | 0.235766 | 0        | 0        | 0        | 0        | 0.340634 | 0        | 0        | 0        | 0        | 0        | 0.432573 | 0        | 0        | 0        |
| MAP2K1-POLK    | 0        | 0        | 0        | 0        | 0        | 0.745869 | 0        | 0        | 0        | 0        | 0        | 0        | 0        | 0.411055 | 0.426471 | 0        |
| EP300-MAPK1    | 0        | 0        | 0.258252 | 0.912524 | 0        | 0        | 0        | 0        | 0        | 0.625698 | 0        | 0        | 0        | 0        | 0        | 0        |
| KRAS-POLK      | 0        | 0        | 0        | 0        | 0        | 0        | 0        | 0        | 0.238817 | 0        | 0.31089  | 0        | 0.824763 | 0        | 0        | 0        |
| BCL2-PIK3R1    | 0        | 0        | 0.373759 | 0        | 0        | 0        | 0        | 0        | 0        | 0.259928 | 0        | 0.348256 | 0        | 0        | 0        | 0        |
| APC-PIK3R1     | 0        | 0.295513 | 0        | 0        | 0        | 0.241145 | 0        | 0        | 0        | 0        | 0        | 0        | 0.302476 | 0        | 0        | 0        |
| E2F2-NRAS      | 0        | 0        | 0        | 0        | 0.412097 | 0.200117 | 0.217834 | 0        | 0        | 0        | 0        | 0        | 0        | 0        | 0        | 0        |
| EGFR-SOS1      | 0        | 0.3366   | 0.441619 | 0        | 0        | 0        | 0        | 0        | 0        | 0.394281 | 0        | 0        | 0        | 0        | 0        | 0        |
| MAP2K2-SOS2    | 0        | 0.514442 | 0        | 0        | 0        | 0        | 0.22375  | 0        | 0        | 0.816339 | 0        | 0        | 0        | 0        | 0        | 0        |
| BCL2-PIK3CD    | 0        | 0        | 0.32374  | 0        | 0        | 0        | 0        | 0        | 0        | 0.407814 | 0        | 0.655217 | 0        | 0        | 0        | 0        |
| GRB2-RPS6KB1   | 0        | 0.38782  | 0.99033  | 0        | 0        | 0.919504 | 0        | 0        | 0        | 0        | 0        | 0        | 0        | 0        | 0        | 0        |
| BAD-RPS6KB2    | 0        | 0        | 1.607682 | 0        | 0        | 0.281807 | 0        | 0        | 0.802097 | 0        | 0        | 0        | 0        | 0        | 0        | 0        |
| AKT3-SOS1      | 0        | 0.24841  | 0.223468 | 0        | 0        | 0.343928 | 0        | 0        | 0        | 0        | 0        | 0        | 0        | 0        | 0        | 0        |
| CDKN1A-MDM2    | 0        | 0        | 0        | 0        | 0.480498 | 0        | 0        | 0        | 0        | 0.505639 | 0.814951 | 0        | 0        | 0        | 0        | 0        |
| AKT2-MAPK3     | 0        | 0        | 0        | 0        | 0        | 0        | 0        | 0        | 0        | 0        | 0.431118 | 0.20756  | 0        | 0.290398 | 0        | 0        |
| PIK3CA-RAF1    | 0        | 0        | 0        | 0.211235 | 0        | 0        | 0        | 0        | 0        | 0        | 0        | 0.217537 | 0        | 0.553121 | 0        | 0        |
| AKT3-SOS2      | 0        | 0        | 0        | 0        | 0.358746 | 0.451188 | 0        | 0        | 0        | 0        | 0        | 0        | 0        | 0.303273 | 0        | 0        |
| NRAS-PIK3CB    | 0        | 0        | 0        | 0.219816 | 0        | 0.609391 | 0        | 0        | 0        | 0        | 0        | 0.522595 | 0        | 0        | 0        | 0        |
| AKT1-DVL1      | 0        | 0.443294 | 0        | 0        | 0        | 0.472043 | 0        | 0        | 0        | 0        | 0        | 0        | 0.716475 | 0        | 0        | 0        |
| MAP2K2-RPS6KB2 | 0        | 0.519566 | 0        | 0        | 0        | 0.910331 | 0        | 0        | 0        | 0        | 0        | 0.461409 | 0        | 0        | 0        | 0        |
| BAX-MTOR       | 0        | 0.309406 | 0        | 0        | 0        | 0.205634 | 0        | 0        | 0        | 0        | 0        | 0.46354  | 0        | 0        | 0        | 0        |
| DVL2-TP53      | 0        | 0.394705 | 0        | 0        | 0        | 0.575668 | 0        | 0        | 0        | 0        | 0        | 0.459266 | 0        | 0        | 0        | 0        |
| APC-MTOR       | 0        | 1.095962 | 0.200578 | 0        | 0        | 0        | 0        | 0        | 0        | 0        | 0        | 0.410975 | 0        | 0        | 0        | 0        |
| TCF7L1-TCF7L2  | 0        | 0.272704 | 0        | 0        | 0        | 0.268573 | 0        | 0        | 0        | 0        | 0        | 0        | 0.519872 | 0        | 0        | 0        |
| PIK3CB-SOS2    | 0        | 0.436887 | 0        | 0.213743 | 0        | 0        | 0        | 0        | 0        | 0        | 0        | 0        | 0        | 0        | 0.323029 | 0        |
| E2F1-SOS2      | 0        | 0.293076 | 0        | 0        | 0        | 0        | 0        | 0.307716 | 0        | 0        | 0        | 0.31727  | 0        | 0        | 0        | 0        |
| HRAS-PIK3CB    | 0        | 0        | 0.25256  | 0.414805 | 0        | 0        | 0.207234 | 0        | 0        | 0        | 0        | 0        | 0        | 0        | 0        | 0        |
| CDKN1A-HRAS    | 0.226133 | 0.241336 | 0        | 0        | 0        | 0        | 0.235072 | 0        | 0        | 0        | 0        | 0        | 0        | 0        | 0        | 0        |
| IGF1R-PIK3R3   | 0        | 0        | 0        | 0        | 0.264101 | 0        | 0        | 0        | 0        | 0.202433 | 0.289858 | 0        | 0        | 0        | 0        | 0        |
| E2F1-HRAS      | 0.317255 | 0        | 0        | 0        | 0        | 0.215662 | 0        | 0        | 0        | 0.258959 | 0        | 0        | 0        | 0        | 0        | 0        |
| BRAF-GRB2      | 0        | 0        | 0        | 0.311983 | 0.285154 | 0        | 0        | 0        | 0        | 0        | 0        | 0        | 0.222546 | 0        | 0        | 0        |
| MAP2K1-PIK3CA  | 0        | 0        | 0.268632 | 0.628365 | 0        | 0        | 0        | 0        | 0        | 0        | 0        | 0        | 0.292658 | 0        | 0        | 0        |
| AXIN2-TCF7     | 0        | 0.487119 | 0        | 0        | 0        | 0.354466 | 0        | 0        | 0        | 0        | 0        | 0.427788 | 0        | 0        | 0        | 0        |
| CDKN1A-MAP2K1  | 0        | 0.308243 | 0.246365 | 0        | 0        | 0        | 0        | 0.272429 | 0        | 0        | 0        | 0        | 0        | 0        | 0        | 0        |
| HRAS-PIK3R1    | 0        | 0        | 0.32818  | 0.254887 | 0        | 0        | 0        | 0        | 0.225747 | 0        | 0        | 0        | 0        | 0        | 0        | 0        |
| E2F3-PIK3R2    | 0        | 0        | 0        | 0.424097 | 0.226209 | 0        | 0        | 0        | 0.440691 | 0        | 0        | 0        | 0        | 0        | 0        | 0        |
| ARAF-POLK      | 0        | 0.457973 | 0        | 0        | 0        | 0.380375 | 0        | 0        | 0        | 0        | 0        | 0        | 0.390776 | 0        | 0        | 0        |
| BAK1-GRB2      | 0        | 0        | 0        | 0        | 0        | 0.402225 | 0        | 0        | 0        | 0        | 0        | 0.218104 | 0        | 0.352734 | 0        | 0        |



|                |   |          |          |          |          |          |          |          |          |          |          |          |          |
|----------------|---|----------|----------|----------|----------|----------|----------|----------|----------|----------|----------|----------|----------|
| CDKN1A-GRB2    | 0 | 0        | 0        | 0.308132 | 0        | 0        | 0        | 0        | 0        | 0        | 0.233802 | 0        | 0        |
| BAD-EP300      | 0 | 0        | 0        | 0.391321 | 0        | 0        | 0        | 0        | 0        | 0.599971 | 0        | 0        | 0        |
| BRAF-PIK3CD    | 0 | 0        | 0.232568 | 0        | 0        | 0        | 0        | 0        | 0        | 0        | 0        | 0        | 0.294947 |
| AKT1-ARAF      | 0 | 0        | 0        | 0.452571 | 0        | 0        | 0        | 0.322552 | 0        | 0        | 0        | 0        | 0        |
| NRAS-TP53      | 0 | 0        | 0        | 0        | 0        | 0        | 0.423598 | 0.231588 | 0        | 0        | 0        | 0        | 0        |
| NRAS-RB1       | 0 | 0        | 0        | 0        | 0.685602 | 0        | 0.417714 | 0        | 0        | 0        | 0        | 0        | 0        |
| SMAD3-TGFA     | 0 | 0        | 0.433773 | 0        | 0        | 0        | 0        | 0        | 0.45225  | 0        | 0        | 0        | 0        |
| RBX1-TCEB2     | 0 | 0        | 0        | 0.969816 | 0.246366 | 0        | 0        | 0        | 0        | 0        | 0        | 0        | 0        |
| RBX1-TCEB1     | 0 | 0        | 0        | 1.254598 | 0.969527 | 0        | 0        | 0        | 0        | 0        | 0        | 0        | 0        |
| MAP2K1-RB1     | 0 | 0        | 0        | 0        | 0        | 0        | 0        | 0        | 0        | 0.62805  | 0.382414 | 0        | 0        |
| MAP2K2-SOS1    | 0 | 0.445743 | 0        | 0        | 0        | 0        | 0.337897 | 0        | 0        | 0        | 0        | 0        | 0        |
| CSNK1A1-LRP5   | 0 | 0.414393 | 0        | 0        | 0        | 0        | 0        | 0        | 0        | 0        | 0        | 0.539221 | 0        |
| EPAS1-ETS1     | 0 | 0        | 0        | 0.957489 | 0.403908 | 0        | 0        | 0        | 0        | 0        | 0        | 0        | 0        |
| PLCG2-PRKCB    | 0 | 0        | 0        | 0        | 0        | 0        | 0.690568 | 0.416945 | 0        | 0        | 0        | 0        | 0        |
| MAPK1-PIK3R1   | 0 | 0        | 0        | 0        | 0        | 0        | 0        | 0        | 0        | 0.484676 | 0.316109 | 0        | 0        |
| CUL2-PIK3CA    | 0 | 0        | 0        | 0.66765  | 1.3476   | 0        | 0        | 0        | 0        | 0        | 0        | 0        | 0        |
| FZD4-PIK3R3    | 0 | 0        | 0        | 0        | 0        | 0.333872 | 0        | 0        | 0        | 0        | 0.45159  | 0        | 0        |
| FOS-JUN        | 0 | 0.796974 | 0.698061 | 0        | 0        | 0        | 0        | 0        | 0        | 0        | 0        | 0        | 0        |
| E2F3-GADD45G   | 0 | 0        | 0        | 0        | 0        | 0        | 0        | 0        | 0.232395 | 0        | 0.277868 | 0        | 0        |
| E2F1-PIK3R1    | 0 | 0        | 0        | 0        | 0        | 0        | 0        | 0        | 0.200248 | 0        | 0.247818 | 0        | 0        |
| MAP2K2-PAK4    | 0 | 0        | 0        | 0.579856 | 0.230832 | 0        | 0        | 0        | 0        | 0        | 0        | 0        | 0        |
| BAX-TGFB1      | 0 | 0        | 0        | 0        | 0        | 0        | 0.310582 | 0        | 0        | 0        | 0        | 0.351462 | 0        |
| HRAS-TCEB2     | 0 | 0        | 0        | 0.833974 | 0.380993 | 0        | 0        | 0        | 0        | 0        | 0        | 0        | 0        |
| EGFR-PIK3R1    | 0 | 0        | 0        | 0        | 0        | 0.358978 | 0        | 0        | 0        | 0.255421 | 0        | 0        | 0        |
| CTNNB1-RAF1    | 0 | 0.990405 | 0        | 0        | 0        | 0        | 0        | 0        | 0        | 0        | 0.562293 | 0        | 0        |
| BAK1-RPS6KB2   | 0 | 0.241831 | 0        | 0        | 0        | 0        | 0        | 0        | 0        | 0        | 0.406057 | 0        | 0        |
| MLH1-TGFBR2    | 0 | 0        | 0.347435 | 0        | 0        | 0        | 0        | 0        | 0        | 0        | 0.773962 | 0        | 0        |
| PIK3CD-RAC2    | 0 | 0        | 0.528345 | 0        | 0        | 0        | 0        | 0        | 0.585477 | 0        | 0        | 0        | 0        |
| PDGFB-VEGFA    | 0 | 0        | 0        | 0.245382 | 0.363062 | 0        | 0        | 0        | 0        | 0        | 0        | 0        | 0        |
| CRKL-MAPK1     | 0 | 0        | 0        | 0.531233 | 0.663346 | 0        | 0        | 0        | 0        | 0        | 0        | 0        | 0        |
| PIK3CB-TGFB3   | 0 | 0        | 0        | 0.383472 | 0        | 0.441909 | 0        | 0        | 0        | 0        | 0        | 0        | 0        |
| ARAF-GSK3B     | 0 | 0        | 0        | 0        | 0        | 0        | 0        | 0        | 0.221997 | 0        | 0        | 0        | 0.200563 |
| APC-SOS2       | 0 | 0        | 0        | 0        | 0        | 0        | 0        | 0        | 0        | 0        | 0.585305 | 0        | 0.254886 |
| PIK3CB-TCF7L2  | 0 | 0        | 0.270321 | 0        | 0        | 0        | 0        | 0        | 0        | 0        | 0.285545 | 0        | 0        |
| GSK3B-MAPK1    | 0 | 0        | 0        | 0        | 0        | 0        | 0        | 0        | 0        | 0.29157  | 0        | 0        | 0.379639 |
| EPAS1-PIK3R3   | 0 | 0        | 0        | 0.736348 | 0.381859 | 0        | 0        | 0        | 0        | 0        | 0        | 0        | 0        |
| DVL1-RPS6KB1   | 0 | 0.232616 | 0        | 0        | 0        | 0        | 0.255777 | 0        | 0        | 0        | 0        | 0        | 0        |
| TFE3-TGFB1     | 0 | 0        | 0        | 0.430463 | 0.262392 | 0        | 0        | 0        | 0        | 0        | 0        | 0        | 0        |
| EGLN2-MAP2K2   | 0 | 0        | 0        | 0.760682 | 0.835966 | 0        | 0        | 0        | 0        | 0        | 0        | 0        | 0        |
| BAX-DVL2       | 0 | 0.457833 | 0        | 0        | 0        | 0        | 0.371254 | 0        | 0        | 0        | 0        | 0        | 0        |
| MAP2K1-TCF7    | 0 | 0        | 0        | 0        | 0        | 0.224585 | 0        | 0        | 0        | 0        | 0        | 0.268347 | 0        |
| MET-PIK3R3     | 0 | 0        | 0.210734 | 0.265551 | 0        | 0        | 0        | 0        | 0        | 0        | 0        | 0        | 0        |
| FZD6-MAP2K1    | 0 | 0.273235 | 0        | 0        | 0        | 0        | 0        | 0        | 0        | 0        | 0.238981 | 0        | 0        |
| NRAS-RAP1A     | 0 | 0        | 0.228474 | 0.546303 | 0        | 0        | 0        | 0        | 0        | 0        | 0        | 0        | 0        |
| ARAF-ELK1      | 0 | 0        | 0        | 0        | 0        | 0.65273  | 0        | 0        | 0        | 0        | 0        | 0        | 0.500072 |
| DVL3-RAF1      | 0 | 0.476652 | 0        | 0        | 0        | 0.775884 | 0        | 0        | 0        | 0        | 0        | 0        | 0        |
| PIK3R3-SHC2    | 0 | 0        | 0        | 0        | 0.236454 | 0.214933 | 0        | 0        | 0        | 0        | 0        | 0        | 0        |
| RALB-TGFA      | 0 | 0        | 0.854061 | 0        | 0        | 0        | 0        | 0        | 0.689431 | 0        | 0        | 0        | 0        |
| MAP2K2-TCEB2   | 0 | 0        | 0        | 0.674847 | 0.269447 | 0        | 0        | 0        | 0        | 0        | 0        | 0        | 0        |
| PIK3CA-RPS6KB1 | 0 | 0        | 0        | 0        | 0        | 0        | 0        | 0        | 0.206058 | 0        | 0.488324 | 0        | 0        |
| CDK6-RB1       | 0 | 0        | 0        | 0        | 0        | 0.311991 | 0        | 0        | 0        | 0        | 0.359335 | 0        | 0        |
| AKT3-MAP2K1    | 0 | 0        | 0        | 0        | 0.303174 | 0        | 0        | 0        | 0.206376 | 0        | 0        | 0        | 0        |
| BRAF-RBX1      | 0 | 0        | 0.782001 | 0.301873 | 0        | 0        | 0        | 0        | 0        | 0        | 0        | 0        | 0        |
| MAPK3-POLK     | 0 | 0.518881 | 0        | 0        | 0        | 0        | 0        | 0        | 0        | 0.247998 | 0        | 0        | 0        |
| EML4-SOS1      | 0 | 0        | 0        | 0        | 0        | 0        | 0.272396 | 0.945925 | 0        | 0        | 0        | 0        | 0        |
| FHIT-MAP2K1    | 0 | 0        | 0        | 0        | 0        | 0        | 0.205509 | 0.227561 | 0        | 0        | 0        | 0        | 0        |
| AXIN2-HRAS     | 0 | 0        | 0.251559 | 0        | 0        | 0        | 0        | 0        | 0        | 0        | 0        | 0        | 0.208713 |
| HRAS-TGFBR2    | 0 | 0        | 0        | 0        | 0        | 0.377564 | 0        | 0        | 0        | 0        | 0.560032 | 0        | 0        |
| ETS1-TCEB2     | 0 | 0        | 0        | 0.235912 | 0.586151 | 0        | 0        | 0        | 0        | 0        | 0        | 0        | 0        |
| MAPK1-TCEB2    | 0 | 0        | 0        | 0.371427 | 0.695768 | 0        | 0        | 0        | 0        | 0        | 0        | 0        | 0        |
| BAK1-SOS1      | 0 | 0        | 0        | 0        | 0        | 0        | 0.205134 | 0.341283 | 0        | 0        | 0        | 0        | 0        |
| PIK3R2-RXRA    | 0 | 0        | 0        | 0        | 0        | 0        | 0.451795 | 0        | 0        | 0        | 0.460535 | 0        | 0        |
| FGF1-MAP2K2    | 0 | 0.217557 | 0        | 0        | 0        | 0        | 0        | 0        | 0        | 0        | 0.219776 | 0        | 0        |
| PLCG1-STAT5B   | 0 | 0        | 0        | 0        | 0        | 0        | 0.322458 | 0.257558 | 0        | 0        | 0        | 0        | 0        |
| APC-KRAS       | 0 | 0        | 0.390216 | 0        | 0        | 0        | 0        | 0        | 0        | 0        | 0        | 0        | 0.443835 |
| AXIN1-JUN      | 0 | 0.385348 | 0.258685 | 0        | 0        | 0        | 0        | 0        | 0        | 0        | 0        | 0        | 0        |
| BRAF-GSK3B     | 0 | 0.304427 | 0        | 0        | 0        | 0        | 0        | 0        | 0        | 0        | 0.70647  | 0        | 0        |
| BAD-HIF1A      | 0 | 0        | 0.202984 | 0.220122 | 0        | 0        | 0        | 0        | 0        | 0        | 0        | 0        | 0        |
| BRCA2-E2F3     | 0 | 0.210945 | 0        | 0        | 0        | 0        | 0        | 0        | 0.404308 | 0        | 0        | 0        | 0        |
| RASSF5-STAT5A  | 0 | 0        | 0        | 0        | 0        | 0        | 0.509138 | 0.551668 | 0        | 0        | 0        | 0        | 0        |
| RPS6KB2-TGFBR1 | 0 | 0        | 0        | 0        | 0        | 0        | 0        | 0        | 0.263148 | 0        | 0.214575 | 0        | 0        |
| PDGFC-PDGFR    | 0 | 0        | 0        | 0        | 0        | 0        | 0        | 0        | 0.810878 | 0.206371 | 0        | 0        | 0        |
| EP300-TCEB2    | 0 | 0        | 0        | 0.426962 | 0.730214 | 0        | 0        | 0        | 0        | 0        | 0        | 0        | 0        |
| BAD-RPS6KB1    | 0 | 0        | 0.368631 | 0        | 0        | 0        | 0        | 0        | 0.564494 | 0        | 0        | 0        | 0        |
| BAK1-PIK3R3    | 0 | 0        | 0.325661 | 0        | 0        | 0        | 0        | 0        | 0        | 0        | 0.39443  | 0        | 0        |
| HRAS-PAK2      | 0 | 0        | 0        | 0.224182 | 0.207273 | 0        | 0        | 0        | 0        | 0        | 0        | 0        | 0        |
| BRAF-CRK       | 0 | 0        | 0        | 0.280659 | 0.44477  | 0        | 0        | 0        | 0        | 0        | 0        | 0        | 0        |

|                |   |          |          |          |          |          |          |          |          |          |          |          |          |          |          |   |
|----------------|---|----------|----------|----------|----------|----------|----------|----------|----------|----------|----------|----------|----------|----------|----------|---|
| PIK3R3-SOS2    | 0 | 0        | 0        | 0.445192 | 0.211103 | 0        | 0        | 0        | 0        | 0        | 0        | 0        | 0        | 0        | 0        | 0 |
| AKT1-AKT3      | 0 | 0.281648 | 0        | 0        | 0        | 0        | 0        | 0        | 0.221741 | 0        | 0        | 0        | 0        | 0        | 0        | 0 |
| CDC42-RAP1A    | 0 | 0        | 0        | 0.705738 | 0.762829 | 0        | 0        | 0        | 0        | 0        | 0        | 0        | 0        | 0        | 0        | 0 |
| EGFR-MAPK3     | 0 | 0        | 0        | 0        | 0        | 0.309134 | 0        | 0        | 0.20097  | 0        | 0        | 0        | 0        | 0        | 0        | 0 |
| FHIT-RASSF1    | 0 | 0        | 0        | 0        | 0        | 0        | 0        | 0.235786 | 0.276725 | 0        | 0        | 0        | 0        | 0        | 0        | 0 |
| BAK1-FRAT2     | 0 | 0        | 0        | 0        | 0        | 0        | 0.647729 | 0        | 0        | 0        | 0        | 0.3499   | 0        | 0        | 0        | 0 |
| LEF1-TCF7      | 0 | 0        | 0        | 0        | 0        | 0        | 0        | 0        | 0        | 0.414264 | 0        | 0        | 0.252398 | 0        | 0        | 0 |
| E2F1-MAP2K2    | 0 | 0        | 0        | 0        | 0.25433  | 0        | 0        | 0        | 0        | 0.260093 | 0        | 0        | 0        | 0        | 0        | 0 |
| PIK3CD-STAT5A  | 0 | 0        | 0        | 0        | 0        | 0        | 0.796442 | 0.272327 | 0        | 0        | 0        | 0        | 0        | 0        | 0        | 0 |
| CDKN1A-JUN     | 0 | 0        | 0.267801 | 0.29027  | 0        | 0        | 0        | 0        | 0        | 0        | 0        | 0        | 0        | 0        | 0        | 0 |
| CTNNB1-TGFBR2  | 0 | 0        | 0        | 0        | 0        | 0        | 1.077318 | 0        | 0        | 0        | 0        | 0        | 0.469792 | 0        | 0        | 0 |
| BAD-MAPK1      | 0 | 0        | 0        | 0        | 0        | 0        | 0        | 0.226672 | 0.461744 | 0        | 0        | 0        | 0        | 0        | 0        | 0 |
| EGFR-PIK3CB    | 0 | 0        | 0.724544 | 0        | 0        | 0        | 0        | 0        | 0.518253 | 0        | 0        | 0        | 0        | 0        | 0        | 0 |
| CTNNB1-PIK3CA  | 0 | 0        | 0        | 0        | 0        | 0.401843 | 0        | 0        | 0        | 0.277159 | 0        | 0        | 0        | 0        | 0        | 0 |
| E2F2-POLK      | 0 | 0        | 0        | 0        | 0        | 0        | 0        | 0        | 0.229348 | 0        | 0        | 0.238919 | 0        | 0        | 0        | 0 |
| BCL2L1-E2F1    | 0 | 0        | 0        | 0        | 0        | 0        | 0.214531 | 0        | 0        | 0.303844 | 0        | 0        | 0        | 0        | 0        | 0 |
| BAX-PTEN       | 0 | 0.271819 | 0        | 0        | 0        | 0        | 0        | 0        | 0        | 0        | 0.260776 | 0        | 0        | 0        | 0        | 0 |
| AKT1-MAPK3     | 0 | 0.411961 | 0        | 0        | 0        | 0        | 0        | 0        | 0        | 0        | 0        | 0.382957 | 0        | 0        | 0        | 0 |
| ETS1-PDGFB     | 0 | 0        | 0        | 0.719837 | 0.362059 | 0        | 0        | 0        | 0        | 0        | 0        | 0        | 0        | 0        | 0        | 0 |
| CCNE1-E2F1     | 0 | 0        | 0        | 0        | 0        | 0        | 0        | 0        | 0        | 0.82073  | 0        | 0.42546  | 0        | 0        | 0        | 0 |
| AKT2-PDGFC     | 0 | 0        | 0        | 0        | 0        | 0        | 0        | 0        | 0        | 0.313464 | 0.340209 | 0        | 0        | 0        | 0        | 0 |
| ARAF-SOS1      | 0 | 0.425764 | 0        | 0        | 0.497645 | 0        | 0        | 0        | 0        | 0        | 0        | 0        | 0        | 0        | 0        | 0 |
| AKT3-BRAF      | 0 | 0        | 0        | 0        | 0        | 0.89508  | 0        | 0        | 0        | 0        | 0        | 0.230161 | 0        | 0        | 0        | 0 |
| PIK3CA-RASSF1  | 0 | 0        | 0        | 0        | 0        | 0        | 0        | 0.579613 | 0.456439 | 0        | 0        | 0        | 0        | 0        | 0        | 0 |
| SOS2-TCEB2     | 0 | 0        | 0        | 0.389042 | 0.338591 | 0        | 0        | 0        | 0        | 0        | 0        | 0        | 0        | 0        | 0        | 0 |
| BRAF-E2F3      | 0 | 0        | 0        | 0        | 0        | 0.261085 | 0        | 0        | 0        | 0        | 0.312502 | 0        | 0        | 0        | 0        | 0 |
| ARAF-KRAS      | 0 | 0        | 0        | 0        | 0.285672 | 0.388489 | 0        | 0        | 0        | 0        | 0        | 0        | 0        | 0        | 0        | 0 |
| IGF1-PIK3CD    | 0 | 0.202371 | 0        | 0        | 0        | 0.470419 | 0        | 0        | 0        | 0        | 0        | 0        | 0        | 0        | 0        | 0 |
| EPAS1-VEGFA    | 0 | 0        | 0        | 0.22906  | 0.281097 | 0        | 0        | 0        | 0        | 0        | 0        | 0        | 0        | 0        | 0        | 0 |
| GAB1-TCF7L1    | 0 | 0        | 0        | 0        | 0        | 0        | 0.357106 | 0        | 0        | 0        | 0        | 0        | 0.346694 | 0        | 0        | 0 |
| AKT2-PAK4      | 0 | 0        | 0        | 1.481072 | 0.838236 | 0        | 0        | 0        | 0        | 0        | 0        | 0        | 0        | 0        | 0        | 0 |
| CTNNB1-PIK3R1  | 0 | 0.293707 | 0        | 0        | 0        | 0        | 0        | 0        | 0        | 0.216062 | 0        | 0        | 0        | 0        | 0        | 0 |
| FRAT1-GADD45B  | 0 | 0.311825 | 0        | 0        | 0        | 0        | 0.207582 | 0        | 0        | 0        | 0        | 0        | 0        | 0        | 0        | 0 |
| FRAT2-FZD5     | 0 | 0        | 0        | 0        | 0        | 0        | 0.559214 | 0        | 0        | 0        | 0        | 0        | 0.376151 | 0        | 0        | 0 |
| PRKCB-STK4     | 0 | 0        | 0        | 0        | 0        | 0        | 0        | 0.603137 | 0.520907 | 0        | 0        | 0        | 0        | 0        | 0        | 0 |
| PIK3R2-POLK    | 0 | 0        | 0.32478  | 0        | 0        | 0        | 0        | 0        | 0.444103 | 0        | 0        | 0        | 0        | 0        | 0        | 0 |
| ARAF-BAX       | 0 | 0.218155 | 0        | 0        | 0        | 0.452441 | 0        | 0        | 0        | 0        | 0        | 0        | 0        | 0        | 0        | 0 |
| CDK2-CDKN1B    | 0 | 0        | 0        | 0        | 0        | 0        | 0        | 0        | 0        | 0.243346 | 0        | 0.258471 | 0        | 0        | 0        | 0 |
| MAPK3-MDM2     | 0 | 0        | 0        | 0        | 0        | 0.210996 | 0        | 0        | 0        | 0        | 0.330831 | 0        | 0        | 0        | 0        | 0 |
| CDK6-NRAS      | 0 | 0        | 0        | 0        | 0        | 0.300029 | 0        | 0        | 0        | 0        | 0        | 0.46989  | 0        | 0        | 0        | 0 |
| ARAF-RPS6KB2   | 0 | 0.425148 | 0        | 0        | 0        | 0        | 0        | 0        | 0        | 0        | 0        | 0.260443 | 0        | 0        | 0        | 0 |
| BRAF-GADD45A   | 0 | 0        | 0        | 0        | 0        | 0        | 0.374967 | 0        | 0        | 0        | 0        | 0        | 0.222506 | 0        | 0        | 0 |
| NRAS-PAK2      | 0 | 0        | 0        | 0.601886 | 0.32721  | 0        | 0        | 0        | 0        | 0        | 0        | 0        | 0        | 0        | 0        | 0 |
| FRAT2-MYC      | 0 | 0.327308 | 0        | 0        | 0        | 0        | 0.23688  | 0        | 0        | 0        | 0        | 0        | 0        | 0        | 0        | 0 |
| SMAD4-TGFBR1   | 0 | 0        | 0        | 0        | 0        | 0        | 0.228851 | 0        | 0        | 0        | 0        | 0        | 0.303599 | 0        | 0        | 0 |
| NRAS-RPS6KB1   | 0 | 0        | 0        | 0        | 0        | 0        | 0.203507 | 0        | 0        | 0        | 0        | 0        | 0.255839 | 0        | 0        | 0 |
| AKT3-KRAS      | 0 | 0        | 0        | 0.244623 | 0.519429 | 0        | 0        | 0        | 0        | 0        | 0        | 0        | 0        | 0        | 0        | 0 |
| E2F1-PLCG1     | 0 | 0        | 0        | 0        | 0        | 0        | 0        | 0.31158  | 0.419178 | 0        | 0        | 0        | 0        | 0        | 0        | 0 |
| CCNE2-MAP2K2   | 0 | 0        | 0        | 0        | 0        | 0        | 0        | 0        | 0        | 0.359772 | 0        | 0.355872 | 0        | 0        | 0        | 0 |
| EP300-PIK3CA   | 0 | 0        | 0        | 0.361152 | 0.462431 | 0        | 0        | 0        | 0        | 0        | 0        | 0        | 0        | 0        | 0        | 0 |
| GAB1-MAP2K2    | 0 | 0        | 0        | 0.462222 | 0        | 0        | 0        | 0        | 0        | 0        | 0        | 0        | 0.255242 | 0        | 0        | 0 |
| HIF1A-MAP2K1   | 0 | 0        | 0        | 0.670014 | 0.34377  | 0        | 0        | 0        | 0        | 0        | 0        | 0        | 0        | 0        | 0        | 0 |
| AXIN1-CDKN1A   | 0 | 0.208572 | 0.279561 | 0        | 0        | 0        | 0        | 0        | 0        | 0        | 0        | 0        | 0        | 0        | 0        | 0 |
| E2F1-PDGFB     | 0 | 0        | 0        | 0        | 0        | 0        | 0        | 0        | 0        | 0.309353 | 0.332547 | 0        | 0        | 0        | 0        | 0 |
| MAPK3-RPS6KB1  | 0 | 0        | 0.328144 | 0        | 0        | 0        | 0        | 0        | 0        | 0.200426 | 0        | 0        | 0        | 0        | 0        | 0 |
| GSK3B-MAP2K2   | 0 | 0        | 0        | 0        | 0        | 0        | 0        | 0        | 0        | 0.295883 | 0        | 0.379001 | 0        | 0        | 0        | 0 |
| CREBBP-RBX1    | 0 | 0        | 0        | 0.536654 | 0.807807 | 0        | 0        | 0        | 0        | 0        | 0        | 0        | 0        | 0        | 0        | 0 |
| ARAF-TCF7L1    | 0 | 0.204119 | 0        | 0        | 0        | 0        | 0.235606 | 0        | 0        | 0        | 0        | 0        | 0        | 0        | 0        | 0 |
| CSNK1A1-POLK   | 0 | 0.908425 | 0        | 0        | 0        | 0        | 0.711812 | 0        | 0        | 0        | 0        | 0        | 0        | 0        | 0        | 0 |
| GADD45B-PIK3CB | 0 | 0        | 0        | 0        | 0        | 0        | 0        | 0        | 0.386672 | 0        | 0.263121 | 0        | 0        | 0        | 0        | 0 |
| MAP2K1-TCF7L1  | 0 | 0.208207 | 0        | 0        | 0        | 0        | 0        | 0        | 0        | 0        | 0        | 0        | 0.361723 | 0        | 0        | 0 |
| ERBB2-MAPK3    | 0 | 0        | 0        | 0        | 0        | 0        | 0        | 0.293677 | 0.269425 | 0        | 0        | 0        | 0        | 0        | 0        | 0 |
| BAD-BRAF       | 0 | 0        | 0        | 0        | 0        | 0        | 0.333424 | 0        | 0        | 0.487862 | 0        | 0        | 0        | 0        | 0        | 0 |
| PIK3CA-PTEN    | 0 | 0        | 0        | 0        | 0.275343 | 0        | 0        | 0        | 0        | 0        | 0        | 0.302778 | 0        | 0        | 0        | 0 |
| AXIN2-CTNNB1   | 0 | 0        | 0.201219 | 0        | 0        | 0        | 0        | 0        | 0        | 0        | 0        | 0        | 0.440535 | 0        | 0        | 0 |
| CREBBP-TCEB1   | 0 | 0        | 0        | 0.435119 | 0.515074 | 0        | 0        | 0        | 0        | 0        | 0        | 0        | 0        | 0        | 0        | 0 |
| POLK-RPS6KB2   | 0 | 0        | 0        | 0        | 0        | 0        | 0        | 0        | 0        | 0.514393 | 0        | 0.25     | 0        | 0        | 0        | 0 |
| BRAF-POLK      | 0 | 0        | 0        | 0        | 0        | 0.860298 | 0        | 0        | 0        | 0        | 0        | 0        | 0.235368 | 0        | 0        | 0 |
| MDM2-TP53      | 0 | 0        | 0        | 0        | 0        | 0        | 0        | 0        | 0        | 0.37053  | 0.308819 | 0        | 0        | 0        | 0        | 0 |
| GRB2-MAPK1     | 0 | 0.249775 | 0        | 0        | 0        | 0        | 0        | 0        | 0        | 0        | 0        | 0        | 0        | 0        | 0.288582 | 0 |
| CCND1-RB1      | 0 | 0.397255 | 0        | 0        | 0        | 0        | 0.23354  | 0        | 0        | 0        | 0        | 0        | 0        | 0        | 0        | 0 |
| MAPK1-POLK     | 0 | 0        | 0        | 0        | 0        | 0        | 0        | 0        | 0        | 0        | 0        | 0        | 0        | 0.403686 | 0.331306 | 0 |
| MAP2K1-PIK3CB  | 0 | 0.683612 | 0        | 0        | 0        | 0        | 0        | 0        | 0        | 0.641753 | 0        | 0        | 0        | 0        | 0        | 0 |
| EGLN2-HRAS     | 0 | 0        | 0        | 0.866421 | 0.535271 | 0        | 0        | 0        | 0        | 0        | 0        | 0        | 0        | 0        | 0        | 0 |
| CDK4-PIK3CB    | 0 | 0        | 0        | 0        | 0        | 0.289768 | 0        | 0        | 0        | 0        | 0        | 0.351177 | 0        | 0        | 0        | 0 |
| KRAS-PTPN11    | 0 | 0        | 0        | 0.466511 | 1.15519  | 0        | 0        | 0        | 0        | 0        | 0        | 0        | 0        | 0        | 0        | 0 |
| MAP2K1-SMAD3   | 0 | 0        | 0.30626  | 0        | 0        | 0        | 0        | 0        | 0        | 0        | 0        | 0        | 0.326473 | 0        | 0        | 0 |

|               |          |          |          |          |          |          |          |          |          |          |          |          |          |          |          |          |
|---------------|----------|----------|----------|----------|----------|----------|----------|----------|----------|----------|----------|----------|----------|----------|----------|----------|
| BAD-POLK      | 0        | 0        | 0        | 0        | 0        | 0        | 0        | 0        | 0        | 0        | 0.359889 | 0        | 0        | 0        | 0        | 0.304918 |
| SOS2-TGFBR1   | 0        | 0        | 0.341789 | 0        | 0        | 0        | 0        | 0        | 0        | 0        | 0        | 0        | 0        | 0.322272 | 0        | 0        |
| DVL1-LRP5     | 0        | 0.268164 | 0        | 0        | 0        | 0        | 0        | 0.203089 | 0        | 0        | 0        | 0        | 0        | 0        | 0        | 0        |
| JAK3-PIK3CD   | 0        | 0        | 0        | 0        | 0        | 0        | 0        | 0.722185 | 0.537787 | 0        | 0        | 0        | 0        | 0        | 0        | 0        |
| GRB2-VEGFA    | 0        | 0        | 0        | 0.406154 | 0.282656 | 0        | 0        | 0        | 0        | 0        | 0        | 0        | 0        | 0        | 0        | 0        |
| MAP2K1-MAPK8  | 0        | 0        | 0.232175 | 0        | 0        | 0        | 0        | 0        | 0        | 0.733925 | 0        | 0        | 0        | 0        | 0        | 0        |
| PDGFRA-PDGFRB | 0        | 0        | 0        | 0        | 0        | 0        | 0        | 0        | 0        | 0        | 1.038893 | 0.804524 | 0        | 0        | 0        | 0        |
| JAK3-STAT5A   | 0        | 0        | 0        | 0        | 0        | 0        | 0        | 0.308313 | 0.529534 | 0        | 0        | 0        | 0        | 0        | 0        | 0        |
| ERBB2-MAP2K1  | 0        | 0        | 0        | 0        | 0        | 0        | 0        | 0.311872 | 0.200315 | 0        | 0        | 0        | 0        | 0        | 0        | 0        |
| MAPK1-TCF7    | 0        | 0        | 0.30577  | 0        | 0        | 0        | 0        | 0        | 0        | 0        | 0        | 0        | 0        | 0.259614 | 0        | 0        |
| AXIN1-MAP2K1  | 0        | 0.258388 | 0.257456 | 0        | 0        | 0        | 0        | 0        | 0        | 0        | 0        | 0        | 0        | 0        | 0        | 0        |
| AKT1-PIK3R3   | 0        | 0.344262 | 0        | 0        | 0        | 0        | 0        | 0        | 0        | 0        | 0        | 0        | 0        | 0        | 0        | 0.477778 |
| GADD45A-JUN   | 0        | 0.22806  | 0.278362 | 0        | 0        | 0        | 0        | 0        | 0        | 0        | 0        | 0        | 0        | 0        | 0        | 0        |
| BAK1-MAPK3    | 0        | 0        | 0.355717 | 0        | 0        | 0        | 0        | 0        | 0        | 0        | 0.566298 | 0        | 0        | 0        | 0        | 0        |
| MTOR-PIK3CB   | 0        | 0        | 0        | 0        | 0        | 0        | 0        | 0.499991 | 0        | 0        | 0        | 0        | 0        | 0.221618 | 0        | 0        |
| BAX-PLCG2     | 0        | 0        | 0        | 0        | 0        | 0.242472 | 0.251862 | 0        | 0        | 0        | 0        | 0        | 0        | 0        | 0        | 0        |
| GADD45G-KRAS  | 0        | 0        | 0        | 0        | 0        | 0        | 0        | 0        | 0        | 0.242875 | 0        | 0.291228 | 0        | 0        | 0        | 0        |
| AKT2-E2F1     | 0        | 0        | 0        | 0        | 0        | 0        | 0        | 0.418304 | 0        | 0        | 0        | 0.315048 | 0        | 0        | 0        | 0        |
| MAP2K2-MAPK3  | 0        | 0.375707 | 0        | 0        | 0        | 0        | 0        | 0        | 0        | 0        | 0        | 0        | 0.205956 | 0        | 0        | 0        |
| MAP2K2-MAPK1  | 0.345803 | 0        | 0        | 0        | 0        | 0        | 0.208401 | 0        | 0        | 0        | 0        | 0        | 0        | 0        | 0        | 0        |
| AXIN1-CSNK1A1 | 0        | 0.262825 | 0        | 0        | 0        | 0        | 0.326919 | 0        | 0        | 0        | 0        | 0        | 0        | 0        | 0        | 0        |
| E2F1-E2F3     | 0        | 0        | 0        | 0        | 0        | 0        | 0.20537  | 0        | 0        | 0        | 0        | 0        | 0        | 0.262894 | 0        | 0        |
| DDB2-E2F3     | 0        | 0.562874 | 0        | 0        | 0        | 0        | 0        | 0.317747 | 0        | 0        | 0        | 0        | 0        | 0        | 0        | 0        |
| CDK4-PIK3R2   | 0        | 0.436029 | 0        | 0        | 0        | 0        | 0.382863 | 0        | 0        | 0        | 0        | 0        | 0        | 0        | 0        | 0        |
| ARAF-RB1      | 0.314476 | 0        | 0        | 0        | 0        | 0        | 0        | 0        | 0        | 0        | 0        | 0        | 0.247534 | 0        | 0        | 0        |
| AKT1-PIK3CB   | 0        | 0.497795 | 0        | 0        | 0        | 0        | 0        | 0        | 0        | 0        | 0        | 0        | 0.333681 | 0        | 0        | 0        |
| PIK3CA-PTPN11 | 0        | 0        | 0        | 0.644304 | 0.483738 | 0        | 0        | 0        | 0        | 0        | 0        | 0        | 0        | 0        | 0        | 0        |
| BRAF-MTOR     | 0        | 0        | 0        | 0        | 0        | 0.939219 | 0        | 0        | 0        | 0        | 0        | 0        | 0        | 0.669583 | 0        | 0        |
| MAPK1-RAF1    | 0.28922  | 0        | 0        | 0        | 0        | 0        | 0        | 0        | 0        | 0        | 0        | 0        | 0        | 0        | 0        | 0.282444 |
| HRAS-PDPK1    | 0        | 0        | 0        | 0        | 0        | 0        | 0        | 0        | 0        | 0        | 0.319028 | 0        | 0        | 0        | 0        | 0.239265 |
| RAC1-RALA     | 0        | 0        | 2.740405 | 0        | 0        | 0        | 0        | 0        | 0        | 0.567296 | 0        | 0        | 0        | 0        | 0        | 0        |
| BAK1-E2F3     | 0        | 0.320504 | 0        | 0        | 0        | 0        | 0.609561 | 0        | 0        | 0        | 0        | 0        | 0        | 0        | 0        | 0        |
| DVL3-E2F1     | 0        | 0.363    | 0        | 0        | 0        | 0        | 0        | 0        | 0        | 0        | 0        | 0        | 0        | 0.233247 | 0        | 0        |
| STAT5A-STAT5B | 0        | 0        | 0        | 0        | 0        | 0        | 0        | 0.548464 | 0.877063 | 0        | 0        | 0        | 0        | 0        | 0        | 0        |
| AKT1-BRAF     | 0        | 0        | 0        | 0        | 0        | 0        | 0.251051 | 0        | 0        | 0        | 0        | 0        | 0        | 0        | 0        | 0.262446 |
| PIK3CD-WNT10A | 0        | 0.270273 | 0        | 0        | 0        | 0        | 0.380761 | 0        | 0        | 0        | 0        | 0        | 0        | 0        | 0        | 0        |
| CTNNB1-MTOR   | 0        | 0.245336 | 0        | 0        | 0        | 0        | 0        | 0        | 0        | 0        | 0        | 0        | 0        | 0        | 0.219191 | 0        |
| GADD45B-PDGFB | 0        | 0        | 0        | 0        | 0        | 0.307646 | 0        | 0        | 0        | 0        | 0        | 0.200084 | 0        | 0        | 0        | 0        |
| GADD45G-POLK  | 0        | 0.286949 | 0        | 0        | 0        | 0        | 0        | 0        | 0.206939 | 0        | 0        | 0        | 0        | 0        | 0        | 0        |
| GSK3B-PDPK1   | 0        | 0        | 0        | 0        | 0        | 0        | 0        | 0        | 0        | 0        | 0.752136 | 0        | 0        | 0        | 0        | 0.43697  |
| E2F2-PIK3R3   | 0        | 0        | 0        | 0        | 0        | 0.223444 | 0        | 0        | 0        | 0        | 0        | 0        | 0.234024 | 0        | 0        | 0        |
| BAX-MET       | 0        | 0        | 0        | 0        | 0        | 0        | 0.252688 | 0        | 0        | 0        | 0        | 0        | 0        | 0.241571 | 0        | 0        |
| MAPK3-MYC     | 0        | 0        | 0.24841  | 0        | 0        | 0        | 0        | 0        | 0        | 0        | 0        | 0        | 0.254915 | 0        | 0        | 0        |
| PIK3CD-POLK   | 0        | 0        | 0        | 0        | 0        | 0        | 0        | 0        | 0.237168 | 0        | 0        | 0.604069 | 0        | 0        | 0        | 0        |
| EPAS1-MAPK3   | 0        | 0        | 0        | 0.508518 | 0.335585 | 0        | 0        | 0        | 0        | 0        | 0        | 0        | 0        | 0        | 0        | 0        |
| APC-TCF7L2    | 0        | 0        | 0.211609 | 0        | 0        | 0        | 0        | 0        | 0        | 0        | 0        | 0        | 0        | 0.298466 | 0        | 0        |
| KRAS-RB1      | 0        | 0        | 0        | 0        | 0        | 0.218817 | 0        | 0        | 0        | 0        | 0        | 0.351247 | 0        | 0        | 0        | 0        |
| GADD45A-MTOR  | 0        | 0.271805 | 0        | 0        | 0        | 0        | 0.215092 | 0        | 0        | 0        | 0        | 0        | 0        | 0        | 0        | 0        |
| PIK3R3-TGFB1  | 0        | 0        | 0        | 0        | 0        | 0        | 0.25793  | 0        | 0        | 0.289202 | 0        | 0        | 0        | 0        | 0        | 0        |
| APC2-MAP2K2   | 0        | 0.256438 | 0        | 0        | 0        | 0        | 0.223822 | 0        | 0        | 0        | 0        | 0        | 0        | 0        | 0        | 0        |
| AKT3-TGFBR1   | 0        | 0        | 0.566866 | 0        | 0        | 0        | 0        | 0        | 0        | 0        | 0        | 0        | 0        | 0.248641 | 0        | 0        |
| EGLN1-HRAS    | 0        | 0        | 0        | 0.312997 | 0.273165 | 0        | 0        | 0        | 0        | 0        | 0        | 0        | 0        | 0        | 0        | 0        |
| KRAS-LRP6     | 0        | 0.985111 | 0        | 0        | 0        | 0        | 0.368645 | 0        | 0        | 0        | 0        | 0        | 0        | 0        | 0        | 0        |
| BRCA2-RB1     | 0        | 0.606104 | 0        | 0        | 0        | 0        | 0        | 0        | 0        | 0.734175 | 0        | 0        | 0        | 0        | 0        | 0        |
| EGFR-MAP2K1   | 0        | 0        | 0        | 0        | 0        | 0        | 0.211707 | 0        | 0        | 0        | 0        | 0        | 0        | 0        | 0        | 0.266849 |
| MAPK3-TCEB2   | 0        | 0        | 0        | 0.462786 | 0.730835 | 0        | 0        | 0        | 0        | 0        | 0        | 0        | 0        | 0        | 0        | 0        |
| E2F3-PLCG1    | 0        | 0        | 0        | 0        | 0        | 0        | 0        | 0.421437 | 0.435826 | 0        | 0        | 0        | 0        | 0        | 0        | 0        |
| FZD4-TGFBR2   | 0        | 0        | 0        | 0        | 0        | 0        | 0.407349 | 0        | 0        | 0        | 0        | 0        | 0        | 0.316498 | 0        | 0        |
| DVL3-FZD2     | 0        | 0.267439 | 0        | 0        | 0        | 0        | 0        | 0        | 0        | 0        | 0        | 0        | 0        | 0.315912 | 0        | 0        |
| BAK1-DVL2     | 0        | 0.212365 | 0        | 0        | 0        | 0        | 0        | 0        | 0        | 0        | 0        | 0        | 0.221707 | 0        | 0        | 0        |
| BAD-E2F3      | 0        | 0        | 0        | 0        | 0        | 0        | 0        | 0.51004  | 0.328027 | 0        | 0        | 0        | 0        | 0        | 0        | 0        |
| FOXO3-SOS1    | 0        | 0        | 0        | 0        | 0        | 0        | 0        | 0.431966 | 0.373098 | 0        | 0        | 0        | 0        | 0        | 0        | 0        |
| ERBB2-STAT3   | 0        | 0        | 0        | 0        | 0        | 0        | 0        | 0.514155 | 0.244047 | 0        | 0        | 0        | 0        | 0        | 0        | 0        |
| NRAS-PIK3CD   | 0        | 0        | 0        | 0        | 0        | 0        | 0        | 0        | 0        | 0        | 0        | 0.470438 | 0        | 0        | 0        | 0.204256 |
| FRAT2-SOS2    | 0        | 0        | 0        | 0        | 0        | 0        | 0.253249 | 0        | 0        | 0        | 0        | 0        | 0        | 0.211498 | 0        | 0        |
| NRAS-POLK     | 0        | 0        | 0        | 0        | 0        | 0        | 0        | 0        | 0.257625 | 0        | 0        | 0.318003 | 0        | 0        | 0        | 0        |
| JAK3-STK4     | 0        | 0        | 0        | 0        | 0        | 0        | 0        | 0.252551 | 0.273874 | 0        | 0        | 0        | 0        | 0        | 0        | 0        |
| MTOR-RAF1     | 0        | 0        | 0        | 0        | 0        | 0        | 0.257417 | 0        | 0        | 0        | 0        | 0        | 0        | 0.558183 | 0        | 0        |
| GSK3B-HRAS    | 0        | 0        | 0.234233 | 0        | 0        | 0        | 0        | 0        | 0        | 0        | 0.430304 | 0        | 0        | 0        | 0        | 0        |
| GADD45A-KRAS  | 0        | 0        | 0        | 0        | 0        | 0        | 0.317055 | 0        | 0.206659 | 0        | 0        | 0        | 0        | 0        | 0        | 0        |
| GAB1-SOS2     | 0        | 0        | 0        | 0.277236 | 0        | 0        | 0.222645 | 0        | 0        | 0        | 0        | 0        | 0        | 0        | 0        | 0        |
| MAPK1-MAPK8   | 0        | 0        | 0.234717 | 0        | 0        | 0        | 0        | 0        | 0        | 0.790146 | 0        | 0        | 0        | 0        | 0        | 0        |
| EGF-PIK3R2    | 0        | 0        | 0        | 0        | 0        | 0.421665 | 0        | 0        | 0        | 0        | 0.287697 | 0        | 0        | 0        | 0        | 0        |
| BAD-EGLN2     | 0        | 0        | 0        | 0.20934  | 0.446556 | 0        | 0        | 0        | 0        | 0        | 0        | 0        | 0        | 0        | 0        | 0        |
| RBX1-SOS1     | 0        | 0        | 0        | 0.371107 | 0.568626 | 0        | 0        | 0        | 0        | 0        | 0        | 0        | 0        | 0        | 0        | 0        |
| BRCA2-KRAS    | 0        | 0.321054 | 0        | 0        | 0        | 0        | 0        | 0        | 0        | 0        | 0.200354 | 0        | 0        | 0        | 0        | 0        |
| MET-RPS6KB2   | 0        | 0        | 0        | 0        | 0        | 0        | 0.29875  | 0        | 0        | 0        | 0        | 0        | 0        | 0.219452 | 0        | 0        |



|                |          |          |          |          |          |          |          |          |          |          |          |          |         |          |          |   |
|----------------|----------|----------|----------|----------|----------|----------|----------|----------|----------|----------|----------|----------|---------|----------|----------|---|
| CHUK-TGFB1     | 0        | 0        | 0        | 0        | 0        | 0        | 0        | 0        | 0        | 0        | 0.437558 | 0        | 0       | 0        | 0        | 0 |
| CDC42-GADD45G  | 0        | 0        | 0        | 0        | 0        | 0        | 0        | 0        | 0        | 0        | 0.327066 | 0        | 0       | 0        | 0        | 0 |
| ERG-GRB2       | 0        | 0        | 0        | 0        | 0        | 0        | 0        | 0        | 0        | 0        | 0.240709 | 0        | 0       | 0        | 0        | 0 |
| RB1-TCF7L2     | 0        | 0        | 0        | 0        | 0        | 0        | 0        | 0        | 0        | 0        | 0.274268 | 0        | 0       | 0        | 0        | 0 |
| CDK4-DVL3      | 0        | 0.285831 | 0        | 0        | 0        | 0        | 0        | 0        | 0        | 0        | 0        | 0        | 0       | 0        | 0        | 0 |
| SHC2-SOS1      | 0        | 0.235504 | 0        | 0        | 0        | 0        | 0        | 0        | 0        | 0        | 0        | 0        | 0       | 0        | 0        | 0 |
| IKBKG-RP56KB2  | 0        | 0        | 0        | 0        | 0        | 0        | 0        | 0        | 0        | 0        | 0.787988 | 0        | 0       | 0        | 0        | 0 |
| ARID1A-FRAT1   | 0        | 0        | 0        | 0        | 0        | 0        | 0        | 0        | 0.371945 | 0        | 0        | 0        | 0       | 0        | 0        | 0 |
| IKKB8-SMAD3    | 0        | 0        | 0        | 0        | 0        | 0        | 0        | 0        | 0        | 0        | 0.56859  | 0        | 0       | 0        | 0        | 0 |
| ARID2-KRAS     | 0        | 0        | 0        | 0        | 0        | 0        | 0.447953 | 0        | 0        | 0        | 0        | 0        | 0       | 0        | 0        | 0 |
| ARID2-CSNK1A1  | 0        | 0        | 0        | 0        | 0        | 0        | 0.586132 | 0        | 0        | 0        | 0        | 0        | 0       | 0        | 0        | 0 |
| HES1-NFKB2     | 0        | 0.217478 | 0        | 0        | 0        | 0        | 0        | 0        | 0        | 0        | 0        | 0        | 0       | 0        | 0        | 0 |
| AKT2-CCND1     | 0        | 0        | 0        | 0        | 0        | 0        | 0        | 0        | 0        | 0        | 0        | 0.387501 | 0       | 0        | 0        | 0 |
| DDB2-GADD45A   | 0        | 0        | 0.266001 | 0        | 0        | 0        | 0        | 0        | 0        | 0        | 0        | 0        | 0       | 0        | 0        | 0 |
| JAK1-NFKB1     | 0        | 0        | 0        | 0        | 0        | 0        | 0        | 0        | 0        | 0.520757 | 0        | 0        | 0       | 0        | 0        | 0 |
| PBRM1-RAF1     | 0        | 0        | 0        | 0        | 0        | 0.976202 | 0        | 0        | 0        | 0        | 0        | 0        | 0       | 0        | 0        | 0 |
| CDKN1A-RELA    | 0        | 0        | 0        | 0        | 0        | 0        | 0        | 0        | 0        | 0        | 0.231858 | 0        | 0       | 0        | 0        | 0 |
| CALM3-CDKN1A   | 0        | 0        | 0        | 0        | 0        | 0.260076 | 0        | 0        | 0        | 0        | 0        | 0        | 0       | 0        | 0        | 0 |
| KRAS-TP53      | 0        | 0        | 0        | 0        | 0        | 0        | 0        | 0        | 0        | 0        | 0        | 0.307936 | 0       | 0        | 0        | 0 |
| GAB1-TCEB1     | 0        | 0        | 0        | 0        | 0.2839   | 0        | 0        | 0        | 0        | 0        | 0        | 0        | 0       | 0        | 0        | 0 |
| PIK3R1-TGFBR2  | 0        | 0        | 0        | 0        | 0        | 0        | 0        | 0        | 0        | 0        | 0.528434 | 0        | 0       | 0        | 0        | 0 |
| AR-MAPK1       | 0        | 0        | 0        | 0        | 0        | 0        | 0        | 0        | 0        | 0        | 0.331967 | 0        | 0       | 0        | 0        | 0 |
| PDGFRA-RAF1    | 0        | 0        | 0        | 0        | 0        | 0.405463 | 0        | 0        | 0        | 0        | 0        | 0        | 0       | 0        | 0        | 0 |
| AKT1-PDPK1     | 0        | 0        | 0        | 0        | 0        | 0        | 0        | 0        | 0.217192 | 0        | 0        | 0        | 0       | 0        | 0        | 0 |
| LRP6-NOTCH2    | 0        | 0.217704 | 0        | 0        | 0        | 0        | 0        | 0        | 0        | 0        | 0        | 0        | 0       | 0        | 0        | 0 |
| ELK1-SOS1      | 0        | 0        | 0        | 0        | 0        | 0        | 0        | 0        | 0        | 0        | 0        | 0        | 0       | 0        | 0.369742 | 0 |
| PIK3CD-TCEB1   | 0        | 0        | 0        | 0        | 0.208677 | 0        | 0        | 0        | 0        | 0        | 0        | 0        | 0       | 0        | 0        | 0 |
| DVL1-MYC       | 0        | 0.225233 | 0        | 0        | 0        | 0        | 0        | 0        | 0        | 0        | 0        | 0        | 0       | 0        | 0        | 0 |
| CREB1-SOS1     | 0        | 0        | 0        | 0        | 0        | 0        | 0        | 0        | 0        | 0        | 0.349421 | 0        | 0       | 0        | 0        | 0 |
| CREB1-SOS2     | 0        | 0        | 0        | 0        | 0        | 0        | 0        | 0        | 0        | 0        | 0.447227 | 0        | 0       | 0        | 0        | 0 |
| NRAS-SLC2A1    | 0        | 0        | 0        | 0        | 0.298784 | 0        | 0        | 0        | 0        | 0        | 0        | 0        | 0       | 0        | 0        | 0 |
| IL1R2-NFKBIA   | 0        | 0        | 0        | 0        | 0        | 0        | 0        | 0        | 0        | 0        | 0.243163 | 0        | 0       | 0        | 0        | 0 |
| FGF2-JAG1      | 0        | 0.21136  | 0        | 0        | 0        | 0        | 0        | 0        | 0        | 0        | 0        | 0        | 0       | 0        | 0        | 0 |
| GAB1-RBX1      | 0        | 0        | 0        | 0.205484 | 0        | 0        | 0        | 0        | 0        | 0        | 0        | 0        | 0       | 0        | 0        | 0 |
| CTNNB1-GADD45G | 0        | 0        | 0        | 0        | 0        | 0        | 0        | 0        | 0        | 0        | 0        | 0        | 0       | 0.233837 | 0        | 0 |
| MAP2K1-MAP2K2  | 0.215204 | 0        | 0        | 0        | 0        | 0        | 0        | 0        | 0        | 0        | 0        | 0        | 0       | 0        | 0        | 0 |
| NRAS-TCEB2     | 0        | 0        | 0        | 0.244293 | 0        | 0        | 0        | 0        | 0        | 0        | 0        | 0        | 0       | 0        | 0        | 0 |
| BRCA1-POLK     | 0        | 0.294036 | 0        | 0        | 0        | 0        | 0        | 0        | 0        | 0        | 0        | 0        | 0       | 0        | 0        | 0 |
| AR-MAP2K1      | 0        | 0        | 0        | 0        | 0        | 0        | 0        | 0        | 0        | 0        | 0.247652 | 0        | 0       | 0        | 0        | 0 |
| CSNK1A1-MAPK3  | 0        | 0        | 0        | 0        | 0        | 0        | 0.747263 | 0        | 0        | 0        | 0        | 0        | 0       | 0        | 0        | 0 |
| NFKB1-RAC3     | 0        | 0        | 0        | 0        | 0        | 0        | 0        | 0        | 0        | 0.630047 | 0        | 0        | 0       | 0        | 0        | 0 |
| GSK3B-RB1      | 0        | 0        | 0        | 0        | 0        | 0        | 0        | 0        | 0        | 0        | 0.292637 | 0        | 0       | 0        | 0        | 0 |
| CASP3-TCF7L1   | 0        | 0        | 0.3888   | 0        | 0        | 0        | 0        | 0        | 0        | 0        | 0        | 0        | 0       | 0        | 0        | 0 |
| CCNE1-CREB3L4  | 0        | 0        | 0        | 0        | 0        | 0        | 0        | 0        | 0        | 0        | 0.248811 | 0        | 0       | 0        | 0        | 0 |
| BAK1-LRP6      | 0        | 0        | 0        | 0        | 0        | 0        | 0        | 0        | 0        | 0        | 0        | 0.338368 | 0       | 0        | 0        | 0 |
| ARAF-FGF17     | 0        | 0        | 0        | 0        | 0        | 0        | 0        | 0        | 0        | 0        | 0.273158 | 0        | 0       | 0        | 0        | 0 |
| GAB1-TGFA      | 0        | 0        | 0        | 0.258089 | 0        | 0        | 0        | 0        | 0        | 0        | 0        | 0        | 0       | 0        | 0        | 0 |
| FRAT2-TP53     | 0        | 0.208908 | 0        | 0        | 0        | 0        | 0        | 0        | 0        | 0        | 0        | 0        | 0       | 0        | 0        | 0 |
| RP56KB2-SMARCB | 0        | 0        | 0        | 0        | 0        | 0        | 0.267533 | 0        | 0        | 0        | 0        | 0        | 0       | 0        | 0        | 0 |
| CASP9-PIK3R3   | 0        | 0        | 0        | 0        | 0        | 0        | 0        | 0        | 0.31968  | 0        | 0        | 0        | 0       | 0        | 0        | 0 |
| E2F1-TGFBR1    | 0        | 0        | 0        | 0        | 0        | 0        | 0        | 0        | 0        | 0        | 0        | 0        | 0.21307 | 0        | 0        | 0 |
| HRAS-RAC3      | 0        | 0        | 0.335068 | 0        | 0        | 0        | 0        | 0        | 0        | 0        | 0        | 0        | 0       | 0        | 0        | 0 |
| GADD45A-TGFB3  | 0        | 0        | 0        | 0        | 0        | 0        | 0        | 0        | 0        | 0.555823 | 0        | 0        | 0       | 0        | 0        | 0 |
| FZD2-SOS2      | 0        | 0.218595 | 0        | 0        | 0        | 0        | 0        | 0        | 0        | 0        | 0        | 0        | 0       | 0        | 0        | 0 |
| AXIN2-RARB     | 0        | 0        | 0        | 0        | 0        | 0        | 0        | 0        | 0        | 0        | 0        | 0.200324 | 0       | 0        | 0        | 0 |
| ARAF-BCL2      | 0        | 0        | 0        | 0        | 0        | 0        | 0        | 0        | 0        | 0        | 0.266964 | 0        | 0       | 0        | 0        | 0 |
| ACTL6B-PHF10   | 0        | 0        | 0        | 0        | 0        | 0        | 0.219453 | 0        | 0        | 0        | 0        | 0        | 0       | 0        | 0        | 0 |
| GSTP1-TCF7     | 0        | 0        | 0        | 0        | 0        | 0        | 0        | 0        | 0        | 0        | 0.265804 | 0        | 0       | 0        | 0        | 0 |
| NRAS-SMARCD2   | 0        | 0        | 0        | 0        | 0        | 0        | 0.238085 | 0        | 0        | 0        | 0        | 0        | 0       | 0        | 0        | 0 |
| IGF1-PLCG2     | 0        | 0        | 0        | 0        | 0        | 0.57998  | 0        | 0        | 0        | 0        | 0        | 0        | 0       | 0        | 0        | 0 |
| AKT2-RP56KB1   | 0        | 0        | 0        | 0        | 0        | 0        | 0.276017 | 0        | 0        | 0        | 0        | 0        | 0       | 0        | 0        | 0 |
| MTOR-PIK3R2    | 0        | 0.345504 | 0        | 0        | 0        | 0        | 0        | 0        | 0        | 0        | 0        | 0        | 0       | 0        | 0        | 0 |
| CREB3-KLK3     | 0        | 0        | 0        | 0        | 0        | 0        | 0        | 0        | 0        | 0        | 0.50653  | 0        | 0       | 0        | 0        | 0 |
| RB1-WNT5A      | 0        | 0        | 0        | 0        | 0        | 0        | 0        | 0        | 0        | 0        | 0        | 0.224976 | 0       | 0        | 0        | 0 |
| ESR2-NOTCH4    | 0        | 0.266013 | 0        | 0        | 0        | 0        | 0        | 0        | 0        | 0        | 0        | 0        | 0       | 0        | 0        | 0 |
| PTEN-SPINT1    | 0        | 0        | 0        | 0        | 0        | 0        | 0        | 0        | 0        | 0.244767 | 0        | 0        | 0       | 0        | 0        | 0 |
| PBRM1-SOS2     | 0        | 0        | 0        | 0        | 0        | 0        | 0.497418 | 0        | 0        | 0        | 0        | 0        | 0       | 0        | 0        | 0 |
| PLCG1-RXR      | 0        | 0        | 0        | 0        | 0        | 0        | 0        | 0.340395 | 0        | 0        | 0        | 0        | 0       | 0        | 0        | 0 |
| GADD45B-RASSF1 | 0        | 0        | 0        | 0        | 0        | 0        | 0        | 0        | 0.399178 | 0        | 0        | 0        | 0       | 0        | 0        | 0 |
| PIK3CA-PRKCA   | 0        | 0        | 0        | 0        | 0        | 0.450382 | 0        | 0        | 0        | 0        | 0        | 0        | 0       | 0        | 0        | 0 |
| AXIN2-RALB     | 0        | 0        | 0.229868 | 0        | 0        | 0        | 0        | 0        | 0        | 0        | 0        | 0        | 0       | 0        | 0        | 0 |
| BAK1-SHC1      | 0        | 0        | 0        | 0        | 0        | 0        | 0.632633 | 0        | 0        | 0        | 0        | 0        | 0       | 0        | 0        | 0 |
| POLK-SMAD2     | 0        | 0        | 0        | 0        | 0        | 0        | 0        | 0        | 0        | 0        | 0        | 0.396772 | 0       | 0        | 0        | 0 |
| PIK3CA-TXNRD2  | 0        | 0        | 0        | 0        | 0        | 0        | 0.375032 | 0        | 0        | 0        | 0        | 0        | 0       | 0        | 0        | 0 |
| APPL1-CDKN1A   | 0        | 0        | 0.278487 | 0        | 0        | 0        | 0        | 0        | 0        | 0        | 0        | 0        | 0       | 0        | 0        | 0 |
| DVL3-TCF7L2    | 0        | 0.20612  | 0        | 0        | 0        | 0        | 0        | 0        | 0        | 0        | 0        | 0        | 0       | 0        | 0        | 0 |
| PDGFB-PDGFD    | 0        | 0        | 0        | 0        | 0        | 0        | 0        | 0        | 0        | 0        | 0.763158 | 0        | 0       | 0        | 0        | 0 |





















|                |   |          |          |          |          |          |          |          |          |          |   |          |          |          |          |   |          |          |   |
|----------------|---|----------|----------|----------|----------|----------|----------|----------|----------|----------|---|----------|----------|----------|----------|---|----------|----------|---|
| PTPN11-TCEB2   | 0 | 0        | 0        | 0.262638 | 0        | 0        | 0        | 0        | 0        | 0        | 0 | 0        | 0        | 0        | 0        | 0 | 0        | 0        | 0 |
| BRAF-TPR       | 0 | 0        | 0        | 0        | 0        | 0        | 0        | 0        | 0        | 0        | 0 | 0        | 0        | 0        | 0        | 0 | 0.220588 | 0        | 0 |
| CALML6-SOS2    | 0 | 0        | 0        | 0        | 0        | 0.298655 | 0        | 0        | 0        | 0        | 0 | 0        | 0        | 0        | 0        | 0 | 0        | 0        | 0 |
| BAK1-BAX       | 0 | 0.547029 | 0        | 0        | 0        | 0        | 0        | 0        | 0        | 0        | 0 | 0        | 0        | 0        | 0        | 0 | 0        | 0        | 0 |
| IGF1R-NFKB2    | 0 | 0.255978 | 0        | 0        | 0        | 0        | 0        | 0        | 0        | 0        | 0 | 0        | 0        | 0        | 0        | 0 | 0        | 0        | 0 |
| CALM1-SHC2     | 0 | 0        | 0        | 0        | 0        | 0.210194 | 0        | 0        | 0        | 0        | 0 | 0        | 0        | 0        | 0        | 0 | 0        | 0        | 0 |
| BCL2-PIK3R3    | 0 | 0        | 0.266205 | 0        | 0        | 0        | 0        | 0        | 0        | 0        | 0 | 0        | 0        | 0        | 0        | 0 | 0        | 0        | 0 |
| AR-SOS1        | 0 | 0        | 0        | 0        | 0        | 0        | 0        | 0        | 0        | 0        | 0 | 0        | 0.371522 | 0        | 0        | 0 | 0        | 0        | 0 |
| CREB3L2-EGFR   | 0 | 0        | 0        | 0        | 0        | 0        | 0        | 0        | 0        | 0        | 0 | 0        | 0.295897 | 0        | 0        | 0 | 0        | 0        | 0 |
| PDGFRB-ZEB1    | 0 | 0        | 0        | 0        | 0        | 0        | 0        | 0        | 0        | 0        | 0 | 0        | 1.351613 | 0        | 0        | 0 | 0        | 0        | 0 |
| CREB3-ERBB2    | 0 | 0        | 0        | 0        | 0        | 0        | 0        | 0        | 0        | 0        | 0 | 0        | 0.288558 | 0        | 0        | 0 | 0        | 0        | 0 |
| HEY1-MTOR      | 0 | 0.412143 | 0        | 0        | 0        | 0        | 0        | 0        | 0        | 0        | 0 | 0        | 0        | 0        | 0        | 0 | 0        | 0        | 0 |
| CREB5-ZEB1     | 0 | 0        | 0        | 0        | 0        | 0        | 0        | 0        | 0        | 0        | 0 | 0        | 0.409385 | 0        | 0        | 0 | 0        | 0        | 0 |
| HRAS-PDGFB     | 0 | 0        | 0        | 0.277643 | 0        | 0        | 0        | 0        | 0        | 0        | 0 | 0        | 0        | 0        | 0        | 0 | 0        | 0        | 0 |
| AKT3-ETS1      | 0 | 0        | 0        | 0.472989 | 0        | 0        | 0        | 0        | 0        | 0        | 0 | 0        | 0        | 0        | 0        | 0 | 0        | 0        | 0 |
| PLD1-TP53      | 0 | 0        | 0        | 0        | 0        | 0        | 0        | 0        | 0        | 0        | 0 | 0.221884 | 0        | 0        | 0        | 0 | 0        | 0        | 0 |
| PLCG2-RASSF5   | 0 | 0        | 0        | 0        | 0        | 0        | 0        | 0.238648 | 0        | 0        | 0 | 0        | 0        | 0        | 0        | 0 | 0        | 0        | 0 |
| CYCS-SMAD3     | 0 | 0        | 0.347988 | 0        | 0        | 0        | 0        | 0        | 0        | 0        | 0 | 0        | 0        | 0        | 0        | 0 | 0        | 0        | 0 |
| PDGFA-RAF1     | 0 | 0        | 0        | 0        | 0        | 0.25127  | 0        | 0        | 0        | 0        | 0 | 0        | 0        | 0        | 0        | 0 | 0        | 0        | 0 |
| NRAS-SMARCC1   | 0 | 0        | 0        | 0        | 0        | 0        | 0.448256 | 0        | 0        | 0        | 0 | 0        | 0        | 0        | 0        | 0 | 0        | 0        | 0 |
| CHUK-PIK3CB    | 0 | 0        | 0        | 0        | 0        | 0        | 0        | 0        | 0        | 0        | 0 | 0        | 0.360463 | 0        | 0        | 0 | 0        | 0        | 0 |
| MAPK10-PIK3CB  | 0 | 0        | 0        | 0        | 0        | 0        | 0        | 0        | 0        | 0        | 0 | 0.304838 | 0        | 0        | 0        | 0 | 0        | 0        | 0 |
| MAPK10-PIK3CD  | 0 | 0        | 0.211821 | 0        | 0        | 0        | 0        | 0        | 0        | 0        | 0 | 0        | 0        | 0        | 0        | 0 | 0        | 0        | 0 |
| LRP5-RAF1      | 0 | 0        | 0        | 0        | 0        | 0        | 0.481335 | 0        | 0        | 0        | 0 | 0        | 0        | 0        | 0        | 0 | 0        | 0        | 0 |
| CDK4-RB1       | 0 | 0.23835  | 0        | 0        | 0        | 0        | 0        | 0        | 0        | 0        | 0 | 0        | 0        | 0        | 0        | 0 | 0        | 0        | 0 |
| CASP3-RHOA     | 0 | 0        | 0.395617 | 0        | 0        | 0        | 0        | 0        | 0        | 0        | 0 | 0        | 0        | 0        | 0        | 0 | 0        | 0        | 0 |
| CDKN1A-DLL4    | 0 | 0.203882 | 0        | 0        | 0        | 0        | 0        | 0        | 0        | 0        | 0 | 0        | 0        | 0        | 0        | 0 | 0        | 0        | 0 |
| ACTL6A-SMAD2   | 0 | 0        | 0        | 0        | 0        | 0        | 0.472533 | 0        | 0        | 0        | 0 | 0        | 0        | 0        | 0        | 0 | 0        | 0        | 0 |
| PLCG1-RB1      | 0 | 0        | 0        | 0        | 0        | 0        | 0        | 0.370419 | 0        | 0        | 0 | 0        | 0        | 0        | 0        | 0 | 0        | 0        | 0 |
| MGST2-SMARCA4  | 0 | 0        | 0        | 0        | 0        | 0        | 0.242769 | 0        | 0        | 0        | 0 | 0        | 0        | 0        | 0        | 0 | 0        | 0        | 0 |
| CDKN1A-CREB1   | 0 | 0        | 0        | 0        | 0        | 0        | 0        | 0        | 0        | 0        | 0 | 0.211163 | 0        | 0        | 0        | 0 | 0        | 0        | 0 |
| BAK1-SOS2      | 0 | 0        | 0        | 0        | 0        | 0        | 0        | 0.218652 | 0        | 0        | 0 | 0        | 0        | 0        | 0        | 0 | 0        | 0        | 0 |
| BAD-MITF       | 0 | 0        | 0        | 0        | 0        | 0        | 0        | 0        | 0        | 0        | 0 | 0        | 0        | 0.315883 | 0        | 0 | 0        | 0        | 0 |
| CDK4-RAC3      | 0 | 0        | 0        | 0        | 0        | 0        | 0        | 0        | 0        | 0        | 0 | 0.213698 | 0        | 0        | 0        | 0 | 0        | 0        | 0 |
| CREB3L2-PDPK1  | 0 | 0        | 0        | 0        | 0        | 0        | 0        | 0        | 0        | 0        | 0 | 0        | 0.400161 | 0        | 0        | 0 | 0        | 0        | 0 |
| MAP2K1-PIK3R3  | 0 | 0        | 0.503344 | 0        | 0        | 0        | 0        | 0        | 0        | 0        | 0 | 0        | 0        | 0        | 0        | 0 | 0        | 0        | 0 |
| JAG2-WNT9A     | 0 | 0.206028 | 0        | 0        | 0        | 0        | 0        | 0        | 0        | 0        | 0 | 0        | 0        | 0        | 0        | 0 | 0        | 0        | 0 |
| BAD-PIK3R1     | 0 | 0        | 0        | 0        | 0        | 0        | 0        | 0        | 0        | 0        | 0 | 0.322006 | 0        | 0        | 0        | 0 | 0        | 0        | 0 |
| GRB2-PIK3R3    | 0 | 0        | 0        | 0        | 0        | 0        | 0        | 0        | 0.201902 | 0        | 0 | 0        | 0        | 0        | 0        | 0 | 0        | 0        | 0 |
| BAD-PIK3R2     | 0 | 0        | 0        | 0.21716  | 0        | 0        | 0        | 0        | 0        | 0        | 0 | 0        | 0        | 0        | 0        | 0 | 0        | 0        | 0 |
| EP300-GAB1     | 0 | 0        | 0        | 0        | 0.263324 | 0        | 0        | 0        | 0        | 0        | 0 | 0        | 0        | 0        | 0        | 0 | 0        | 0        | 0 |
| ETS1-GAB1      | 0 | 0        | 0        | 0.206555 | 0        | 0        | 0        | 0        | 0        | 0        | 0 | 0        | 0        | 0        | 0        | 0 | 0        | 0        | 0 |
| BIRC5-MSH6     | 0 | 0        | 0.416386 | 0        | 0        | 0        | 0        | 0        | 0        | 0        | 0 | 0        | 0        | 0        | 0        | 0 | 0        | 0        | 0 |
| BIRC5-MSH2     | 0 | 0        | 0.327426 | 0        | 0        | 0        | 0        | 0        | 0        | 0        | 0 | 0        | 0        | 0        | 0        | 0 | 0        | 0        | 0 |
| PDPK1-PIK3CB   | 0 | 0        | 0        | 0        | 0        | 0        | 0        | 0.318196 | 0        | 0        | 0 | 0        | 0        | 0        | 0        | 0 | 0        | 0        | 0 |
| PDPK1-PIK3CA   | 0 | 0        | 0        | 0        | 0        | 0        | 0        | 0        | 0        | 0        | 0 | 0        | 0.202439 | 0        | 0        | 0 | 0        | 0        | 0 |
| DVL3-MGST2     | 0 | 0        | 0        | 0        | 0        | 0        | 0.405041 | 0        | 0        | 0        | 0 | 0        | 0        | 0        | 0        | 0 | 0        | 0        | 0 |
| CAMK2D-PIK3CA  | 0 | 0        | 0        | 0        | 0        | 0        | 0.425705 | 0        | 0        | 0        | 0 | 0        | 0        | 0        | 0        | 0 | 0        | 0        | 0 |
| CTNNB1-EGF     | 0 | 0        | 0.241736 | 0        | 0        | 0        | 0        | 0        | 0        | 0        | 0 | 0        | 0        | 0        | 0        | 0 | 0        | 0        | 0 |
| MET-TGFB3      | 0 | 0        | 0        | 0.241123 | 0        | 0        | 0        | 0        | 0        | 0        | 0 | 0        | 0        | 0        | 0        | 0 | 0        | 0        | 0 |
| GADD45A-PMAIP1 | 0 | 0        | 0.378097 | 0        | 0        | 0        | 0        | 0        | 0        | 0        | 0 | 0        | 0        | 0        | 0        | 0 | 0        | 0        | 0 |
| LRP6-TGFB1     | 0 | 0        | 0        | 0        | 0        | 0        | 0        | 0        | 0        | 0        | 0 | 0        | 0        | 0.445795 | 0        | 0 | 0        | 0        | 0 |
| ACTB-PIK3CD    | 0 | 0        | 0        | 0        | 0        | 0        | 0.329534 | 0        | 0        | 0        | 0 | 0        | 0        | 0        | 0        | 0 | 0        | 0        | 0 |
| MAP2K2-TGFB1   | 0 | 0        | 0.244503 | 0        | 0        | 0        | 0        | 0        | 0        | 0        | 0 | 0        | 0        | 0        | 0        | 0 | 0        | 0        | 0 |
| FGF7-IGF1      | 0 | 0.621354 | 0        | 0        | 0        | 0        | 0        | 0        | 0        | 0        | 0 | 0        | 0        | 0        | 0        | 0 | 0        | 0        | 0 |
| ARRGFE6-RAC3   | 0 | 0        | 0        | 0        | 0        | 0        | 0        | 0        | 0        | 0        | 0 | 0.238705 | 0        | 0        | 0        | 0 | 0        | 0        | 0 |
| E2F3-JUP       | 0 | 0        | 0        | 0        | 0        | 0        | 0        | 0        | 0        | 0        | 0 | 0        | 0        | 0        | 0.23769  | 0 | 0        | 0        | 0 |
| ARRGFE6-RAC1   | 0 | 0        | 0        | 0        | 0        | 0        | 0        | 0        | 0        | 0        | 0 | 0.277059 | 0        | 0        | 0        | 0 | 0        | 0        | 0 |
| GAB1-PRCC      | 0 | 0        | 0        | 0        | 0.383234 | 0        | 0        | 0        | 0        | 0        | 0 | 0        | 0        | 0        | 0        | 0 | 0        | 0        | 0 |
| STAT3-STAT5A   | 0 | 0        | 0        | 0        | 0        | 0        | 0        | 0        | 0        | 0.459631 | 0 | 0        | 0        | 0        | 0        | 0 | 0        | 0        | 0 |
| MSH2-MSH6      | 0 | 0        | 0.873176 | 0        | 0        | 0        | 0        | 0        | 0        | 0        | 0 | 0        | 0        | 0        | 0        | 0 | 0        | 0        | 0 |
| ETV5-PDGFC     | 0 | 0        | 0        | 0        | 0        | 0        | 0        | 0        | 0        | 0        | 0 | 0        | 0.302911 | 0        | 0        | 0 | 0        | 0        | 0 |
| FGFR2-PDGFR1   | 0 | 0        | 0        | 0        | 0        | 0        | 0        | 0        | 0        | 0        | 0 | 0        | 0.260812 | 0        | 0        | 0 | 0        | 0        | 0 |
| POLK-PRKCB     | 0 | 0        | 0        | 0        | 0        | 0        | 0        | 0        | 0.277167 | 0        | 0 | 0        | 0        | 0        | 0        | 0 | 0        | 0        | 0 |
| PRKCA-SOS2     | 0 | 0        | 0        | 0        | 0        | 0        | 0.244048 | 0        | 0        | 0        | 0 | 0        | 0        | 0        | 0        | 0 | 0        | 0        | 0 |
| ERG-RELA       | 0 | 0        | 0        | 0        | 0        | 0        | 0        | 0        | 0        | 0        | 0 | 0.222229 | 0        | 0        | 0        | 0 | 0        | 0        | 0 |
| NRAS-TXNRD2    | 0 | 0        | 0        | 0        | 0        | 0        | 0.21658  | 0        | 0        | 0        | 0 | 0        | 0        | 0        | 0        | 0 | 0        | 0        | 0 |
| HSP90B1-SPINT1 | 0 | 0        | 0        | 0        | 0        | 0        | 0        | 0        | 0        | 0        | 0 | 0.475317 | 0        | 0        | 0        | 0 | 0        | 0        | 0 |
| GSTM4-SMARCC1  | 0 | 0        | 0        | 0        | 0        | 0        | 0.289472 | 0        | 0        | 0        | 0 | 0        | 0        | 0        | 0        | 0 | 0        | 0        | 0 |
| MTOR-NOTCH2    | 0 | 0.433068 | 0        | 0        | 0        | 0        | 0        | 0        | 0        | 0        | 0 | 0        | 0        | 0        | 0        | 0 | 0        | 0        | 0 |
| BRAF-PIK3R1    | 0 | 0        | 0        | 0        | 0        | 0        | 0        | 0        | 0        | 0        | 0 | 0        | 0        | 0.276089 | 0        | 0 | 0        | 0        | 0 |
| BRAF-PIK3R3    | 0 | 0        | 0        | 0        | 0        | 0.204609 | 0        | 0        | 0        | 0        | 0 | 0        | 0        | 0        | 0        | 0 | 0        | 0        | 0 |
| ARAF-CSNK1A1L  | 0 | 0.24103  | 0        | 0        | 0        | 0        | 0        | 0        | 0        | 0        | 0 | 0        | 0        | 0        | 0        | 0 | 0        | 0        | 0 |
| MAP2K1-PDPK1   | 0 | 0        | 0        | 0        | 0        | 0        | 0        | 0        | 0        | 0        | 0 | 0        | 0        | 0        | 0        | 0 | 0        | 0.632354 | 0 |
| BCL2-LEF1      | 0 | 0        | 0        | 0        | 0        | 0        | 0        | 0        | 0        | 0        | 0 | 0        | 0        | 0        | 0.403203 | 0 | 0        | 0        | 0 |
| NOTCH3-PIK3CB  | 0 | 0.227361 | 0        | 0        | 0        | 0        | 0        | 0        | 0        | 0        | 0 | 0        | 0        | 0        | 0        | 0 | 0        | 0        | 0 |
| DVL3-LRP5      | 0 | 0        | 0        | 0        | 0        | 0        | 0        | 0        | 0        | 0        | 0 | 0        | 0        | 0        | 0.606255 | 0 | 0        | 0        | 0 |



|                 |   |          |          |   |   |          |          |          |          |   |          |         |          |          |          |   |          |   |          |
|-----------------|---|----------|----------|---|---|----------|----------|----------|----------|---|----------|---------|----------|----------|----------|---|----------|---|----------|
| ACTL6A-PIK3CA   | 0 | 0        | 0        | 0 | 0 | 0        | 0        | 1.27     | 0        | 0 | 0        | 0       | 0        | 0        | 0        | 0 | 0        | 0 | 0        |
| KRAS-SMAD2      | 0 | 0        | 0        | 0 | 0 | 0        | 0        | 0        | 0        | 0 | 0        | 0       | 0        | 0        | 0.242283 | 0 | 0        | 0 | 0        |
| FGF7-PDGFRB     | 0 | 0        | 0        | 0 | 0 | 0        | 0        | 0        | 0        | 0 | 0        | 0       | 0        | 0.236938 | 0        | 0 | 0        | 0 | 0        |
| FGF7-PDGFRB     | 0 | 0        | 0        | 0 | 0 | 0        | 0        | 0        | 0        | 0 | 0        | 0       | 0        | 0.329113 | 0        | 0 | 0        | 0 | 0        |
| CDK2-GRB2       | 0 | 0        | 0        | 0 | 0 | 0        | 0        | 0        | 0        | 0 | 0        | 0       | 0        | 0        | 0.521753 | 0 | 0        | 0 | 0        |
| CDK6-STK4       | 0 | 0        | 0        | 0 | 0 | 0        | 0        | 0.460077 | 0        | 0 | 0        | 0       | 0        | 0        | 0        | 0 | 0        | 0 | 0        |
| PIK3CD-RB1      | 0 | 0.449295 | 0        | 0 | 0 | 0        | 0        | 0        | 0        | 0 | 0        | 0       | 0        | 0        | 0        | 0 | 0        | 0 | 0        |
| FOXO3-LEF1      | 0 | 0        | 0        | 0 | 0 | 0        | 0        | 0        | 0        | 0 | 0        | 0       | 0        | 0        | 0        | 0 | 0        | 0 | 0.214309 |
| DDB2-PIK3CD     | 0 | 0        | 0        | 0 | 0 | 0        | 0        | 0.539547 | 0        | 0 | 0        | 0       | 0        | 0        | 0        | 0 | 0        | 0 | 0        |
| NFKB2-PIK3CD    | 0 | 1.05301  | 0        | 0 | 0 | 0        | 0        | 0        | 0        | 0 | 0        | 0       | 0        | 0        | 0        | 0 | 0        | 0 | 0        |
| FZD4-TGFB3      | 0 | 0        | 0        | 0 | 0 | 0        | 0        | 0        | 0        | 0 | 0        | 0       | 0        | 0        | 0.459016 | 0 | 0        | 0 | 0        |
| GRB2-PIK3CA     | 0 | 0        | 0        | 0 | 0 | 0        | 0        | 0        | 0        | 0 | 0        | 0       | 0        | 0        | 0        | 0 | 0        | 0 | 0.235048 |
| ERBB2-LRP5      | 0 | 0        | 0        | 0 | 0 | 0        | 0        | 0        | 0        | 0 | 0        | 0       | 0        | 0        | 0.238359 | 0 | 0        | 0 | 0        |
| CALML6-PLCG1    | 0 | 0        | 0        | 0 | 0 | 0        | 0        | 0.400181 | 0        | 0 | 0        | 0       | 0        | 0        | 0        | 0 | 0        | 0 | 0        |
| CDKN1A-CSNK1A1  | 0 | 0.392797 | 0        | 0 | 0 | 0        | 0        | 0        | 0        | 0 | 0        | 0       | 0        | 0        | 0        | 0 | 0        | 0 | 0        |
| JAG2-KRAS       | 0 | 0.212342 | 0        | 0 | 0 | 0        | 0        | 0        | 0        | 0 | 0        | 0       | 0        | 0        | 0        | 0 | 0        | 0 | 0        |
| E2F1-TCF7L1     | 0 | 0        | 0        | 0 | 0 | 0        | 0        | 0.25043  | 0        | 0 | 0        | 0       | 0        | 0        | 0        | 0 | 0        | 0 | 0        |
| RPS6KB1-SOS1    | 0 | 0        | 0        | 0 | 0 | 0        | 0        | 0        | 0        | 0 | 0        | 0       | 0        | 0        | 0.276078 | 0 | 0        | 0 | 0        |
| E2F3-FRAT1      | 0 | 0.229177 | 0        | 0 | 0 | 0        | 0        | 0        | 0        | 0 | 0        | 0       | 0        | 0        | 0        | 0 | 0        | 0 | 0        |
| TGFB3-WNT5A     | 0 | 0        | 0        | 0 | 0 | 0        | 0        | 0        | 0        | 0 | 0        | 0       | 0        | 0        | 0.230639 | 0 | 0        | 0 | 0        |
| FZD5-FZD6       | 0 | 0        | 0        | 0 | 0 | 0        | 0        | 0        | 0        | 0 | 0        | 0       | 0        | 0        | 0.3324   | 0 | 0        | 0 | 0        |
| PIK3CA-SMAD2    | 0 | 0        | 0        | 0 | 0 | 0        | 0        | 0.454658 | 0        | 0 | 0        | 0       | 0        | 0        | 0        | 0 | 0        | 0 | 0        |
| GSTP1-RAF1      | 0 | 0        | 0        | 0 | 0 | 0        | 0        | 0.306161 | 0        | 0 | 0        | 0       | 0        | 0        | 0        | 0 | 0        | 0 | 0        |
| AR-CCNE2        | 0 | 0        | 0        | 0 | 0 | 0        | 0        | 0        | 0        | 0 | 0        | 0       | 0.307273 | 0        | 0        | 0 | 0        | 0 | 0        |
| CTNNB1-NRAS     | 0 | 0        | 0.306954 | 0 | 0 | 0        | 0        | 0        | 0        | 0 | 0        | 0       | 0        | 0        | 0        | 0 | 0        | 0 | 0        |
| APC-GSK3B       | 0 | 0        | 0        | 0 | 0 | 0        | 0        | 0        | 0        | 0 | 0        | 0       | 0        | 0        | 0        | 0 | 0        | 0 | 0.223759 |
| GADD45G-HRAS    | 0 | 0        | 0        | 0 | 0 | 0        | 0        | 0        | 0        | 0 | 0        | 0       | 0        | 0.208987 | 0        | 0 | 0        | 0 | 0        |
| BRD7-GADD45G    | 0 | 0        | 0        | 0 | 0 | 0        | 0        | 0.203684 | 0        | 0 | 0        | 0       | 0        | 0        | 0        | 0 | 0        | 0 | 0        |
| RPS6KB1-SMARCE1 | 0 | 0        | 0        | 0 | 0 | 0        | 0        | 1.123968 | 0        | 0 | 0        | 0       | 0        | 0        | 0        | 0 | 0        | 0 | 0        |
| DDB2-JAG2       | 0 | 0.210787 | 0        | 0 | 0 | 0        | 0        | 0        | 0        | 0 | 0        | 0       | 0        | 0        | 0        | 0 | 0        | 0 | 0        |
| AKT2-STAT5A     | 0 | 0        | 0        | 0 | 0 | 0        | 0        | 0        | 0.334702 | 0 | 0        | 0       | 0        | 0        | 0        | 0 | 0        | 0 | 0        |
| FZD1-MAPK3      | 0 | 0        | 0        | 0 | 0 | 0        | 0        | 0.233544 | 0        | 0 | 0        | 0       | 0        | 0        | 0        | 0 | 0        | 0 | 0        |
| PDGFB-POLK      | 0 | 0        | 0        | 0 | 0 | 0        | 0        | 0        | 0        | 0 | 0        | 0       | 0        | 0.414466 | 0        | 0 | 0        | 0 | 0        |
| BRCA1-E2F1      | 0 | 0.370852 | 0        | 0 | 0 | 0        | 0        | 0        | 0        | 0 | 0        | 0       | 0        | 0        | 0        | 0 | 0        | 0 | 0        |
| DDB2-PDGFRB     | 0 | 0        | 0        | 0 | 0 | 0        | 0        | 0        | 0        | 0 | 0        | 0       | 0        | 0.217628 | 0        | 0 | 0        | 0 | 0        |
| CDK4-E2F2       | 0 | 0        | 0        | 0 | 0 | 0        | 0        | 0.256515 | 0        | 0 | 0        | 0       | 0        | 0        | 0        | 0 | 0        | 0 | 0        |
| PIK3R2-TGFB2    | 0 | 0        | 0        | 0 | 0 | 0.336931 | 0        | 0        | 0        | 0 | 0        | 0       | 0        | 0        | 0        | 0 | 0        | 0 | 0        |
| HSP90AA1-KRAS   | 0 | 0        | 0        | 0 | 0 | 0        | 0        | 0        | 0        | 0 | 0        | 0       | 0.243028 | 0        | 0        | 0 | 0        | 0 | 0        |
| BAX-MDM2        | 0 | 0        | 0        | 0 | 0 | 0        | 0        | 0        | 0        | 0 | 0        | 0       | 0        | 0.245413 | 0        | 0 | 0        | 0 | 0        |
| BRCA2-MAPK8     | 0 | 0        | 0        | 0 | 0 | 0        | 0        | 0        | 0        | 0 | 0.264919 | 0       | 0        | 0        | 0        | 0 | 0        | 0 | 0        |
| EP300-ETS1      | 0 | 0        | 0        | 0 | 0 | 0.200309 | 0        | 0        | 0        | 0 | 0        | 0       | 0        | 0        | 0        | 0 | 0        | 0 | 0        |
| MYC-PAX8        | 0 | 0        | 0        | 0 | 0 | 0        | 0        | 0        | 0        | 0 | 0        | 0       | 0        | 0        | 0        | 0 | 0.332934 | 0 | 0        |
| AKT3-CDC42      | 0 | 0        | 0        | 0 | 0 | 0.224875 | 0        | 0        | 0        | 0 | 0        | 0       | 0        | 0        | 0        | 0 | 0        | 0 | 0        |
| MAPK9-PIK3CD    | 0 | 0        | 0.328098 | 0 | 0 | 0        | 0        | 0        | 0        | 0 | 0        | 0       | 0        | 0        | 0        | 0 | 0        | 0 | 0        |
| AKT1-AKT2       | 0 | 0        | 0        | 0 | 0 | 0        | 0        | 0        | 0        | 0 | 0        | 0       | 0        | 0.352386 | 0        | 0 | 0        | 0 | 0        |
| FRAT1-SHC2      | 0 | 0        | 0        | 0 | 0 | 0        | 0        | 0        | 0        | 0 | 0        | 0       | 0        | 0        | 0.288997 | 0 | 0        | 0 | 0        |
| HRAS-MAPK3      | 0 | 0        | 0        | 0 | 0 | 0        | 0.385823 | 0        | 0        | 0 | 0        | 0       | 0        | 0        | 0        | 0 | 0        | 0 | 0        |
| KLK3-SRD5A2     | 0 | 0        | 0        | 0 | 0 | 0        | 0        | 0        | 0        | 0 | 0        | 0       | 0.239154 | 0        | 0        | 0 | 0        | 0 | 0        |
| AREG-EREG       | 0 | 0        | 0.558349 | 0 | 0 | 0        | 0        | 0        | 0        | 0 | 0        | 0       | 0        | 0        | 0        | 0 | 0        | 0 | 0        |
| E2F1-PIK3CA     | 0 | 0        | 0        | 0 | 0 | 0        | 0.292679 | 0        | 0        | 0 | 0        | 0       | 0        | 0        | 0        | 0 | 0        | 0 | 0        |
| JAG2-SP1        | 0 | 0.217679 | 0        | 0 | 0 | 0        | 0        | 0        | 0        | 0 | 0        | 0       | 0        | 0        | 0        | 0 | 0        | 0 | 0        |
| CREB3L2-PIK3CB  | 0 | 0        | 0        | 0 | 0 | 0        | 0        | 0        | 0        | 0 | 0        | 0       | 0.225433 | 0        | 0        | 0 | 0        | 0 | 0        |
| BAD-PRCC        | 0 | 0        | 0.236072 | 0 | 0 | 0        | 0        | 0        | 0        | 0 | 0        | 0       | 0        | 0        | 0        | 0 | 0        | 0 | 0        |
| APC-SMARCD2     | 0 | 0        | 0        | 0 | 0 | 0        | 0.430299 | 0        | 0        | 0 | 0        | 0       | 0        | 0        | 0        | 0 | 0        | 0 | 0        |
| RAP1A-RAP1B     | 0 | 0        | 0.835693 | 0 | 0 | 0        | 0        | 0        | 0        | 0 | 0        | 0       | 0        | 0        | 0        | 0 | 0        | 0 | 0        |
| FHIT-KRAS       | 0 | 0        | 0        | 0 | 0 | 0        | 0        | 0        | 0.265836 | 0 | 0        | 0       | 0        | 0        | 0        | 0 | 0        | 0 | 0        |
| FZD5-PIK3R2     | 0 | 0.259965 | 0        | 0 | 0 | 0        | 0        | 0        | 0        | 0 | 0        | 0       | 0        | 0        | 0        | 0 | 0        | 0 | 0        |
| EGFR-MAPK8      | 0 | 0        | 0        | 0 | 0 | 0        | 0        | 0        | 0        | 0 | 0.213322 | 0       | 0        | 0        | 0        | 0 | 0        | 0 | 0        |
| EGLN1-VEGFA     | 0 | 0        | 0        | 0 | 0 | 0.23005  | 0        | 0        | 0        | 0 | 0        | 0       | 0        | 0        | 0        | 0 | 0        | 0 | 0        |
| FZD5-PIK3R3     | 0 | 0        | 0        | 0 | 0 | 0        | 0        | 0.344422 | 0        | 0 | 0        | 0       | 0        | 0        | 0        | 0 | 0        | 0 | 0        |
| FGF7-TGFB3      | 0 | 0        | 0        | 0 | 0 | 0        | 0        | 0        | 0        | 0 | 0        | 0       | 0        | 0        | 0.240794 | 0 | 0        | 0 | 0        |
| PDGFB-RAF1      | 0 | 0        | 0        | 0 | 0 | 0        | 0        | 0        | 0        | 0 | 0        | 0       | 0        | 0.203225 | 0        | 0 | 0        | 0 | 0        |
| LRP6-MGST1      | 0 | 0        | 0        | 0 | 0 | 0        | 0        | 0.428276 | 0        | 0 | 0        | 0       | 0        | 0        | 0        | 0 | 0        | 0 | 0        |
| GADD45G-MAPK1   | 0 | 0        | 0        | 0 | 0 | 0        | 0        | 0        | 0        | 0 | 0        | 0       | 0        | 0        | 0        | 0 | 0.26539  | 0 | 0        |
| EGLN3-SLC2A1    | 0 | 0        | 0.251525 | 0 | 0 | 0        | 0        | 0        | 0        | 0 | 0        | 0       | 0        | 0        | 0        | 0 | 0        | 0 | 0        |
| NQO1-TXNRD1     | 0 | 0        | 0        | 0 | 0 | 0        | 0.230981 | 0        | 0        | 0 | 0        | 0       | 0        | 0        | 0        | 0 | 0        | 0 | 0        |
| ARHGEF6-BCL2L1  | 0 | 0        | 0        | 0 | 0 | 0        | 0        | 0        | 0        | 0 | 0.279268 | 0       | 0        | 0        | 0        | 0 | 0        | 0 | 0        |
| MAPK10-MAPK3    | 0 | 0        | 0        | 0 | 0 | 0        | 0        | 0        | 0        | 0 | 0.398985 | 0       | 0        | 0        | 0        | 0 | 0        | 0 | 0        |
| EGFR-KRAS       | 0 | 0        | 0        | 0 | 0 | 0        | 0        | 0        | 0        | 0 | 0.307069 | 0       | 0        | 0        | 0        | 0 | 0        | 0 | 0        |
| ARID2-GSK3B     | 0 | 0        | 0        | 0 | 0 | 0        | 0        | 0.536996 | 0        | 0 | 0        | 0       | 0        | 0        | 0        | 0 | 0        | 0 | 0        |
| E2F3-TGFB3      | 0 | 0        | 0        | 0 | 0 | 0        | 0        | 0        | 0        | 0 | 0.222119 | 0       | 0        | 0        | 0        | 0 | 0        | 0 | 0        |
| CYCS-RALGDS     | 0 | 0        | 0.373861 | 0 | 0 | 0        | 0        | 0        | 0        | 0 | 0        | 0       | 0        | 0        | 0        | 0 | 0        | 0 | 0        |
| FOXO1-IGF1R     | 0 | 0        | 0        | 0 | 0 | 0        | 0        | 0        | 0        | 0 | 0        | 0.31634 | 0        | 0        | 0        | 0 | 0        | 0 | 0        |
| AKT2-BAD        | 0 | 0        | 0        | 0 | 0 | 0        | 0        | 0        | 0        | 0 | 0        | 0       | 0        | 0.315221 | 0        | 0 | 0        | 0 | 0        |
| ARNT-HRAS       | 0 | 0        | 0        | 0 | 0 | 0.217452 | 0        | 0        | 0        | 0 | 0        | 0       | 0        | 0        | 0        | 0 | 0        | 0 | 0        |
| ARHGEF6-STAT3   | 0 | 0        | 0        | 0 | 0 | 0        | 0        | 0        | 0        | 0 | 0.379125 | 0       | 0        | 0        | 0        | 0 | 0        | 0 | 0        |
| ARHGEF6-STAT1   | 0 | 0        | 0        | 0 | 0 | 0        | 0        | 0        | 0        | 0 | 0.454591 | 0       | 0        | 0        | 0        | 0 | 0        | 0 | 0        |

|                |          |          |          |          |          |          |          |   |   |   |          |          |          |          |          |          |          |   |
|----------------|----------|----------|----------|----------|----------|----------|----------|---|---|---|----------|----------|----------|----------|----------|----------|----------|---|
| FH-PIK3R3      | 0        | 0        | 0        | 0        | 0.302559 | 0        | 0        | 0 | 0 | 0 | 0        | 0        | 0        | 0        | 0        | 0        | 0        | 0 |
| AKT3-FZD4      | 0        | 0        | 0        | 0        | 0        | 0        | 0        | 0 | 0 | 0 | 0        | 0        | 0        | 0        | 0.468989 | 0        | 0        | 0 |
| BAD-PRKCB      | 0        | 0        | 0        | 0        | 0        | 0        | 0.362085 | 0 | 0 | 0 | 0        | 0        | 0        | 0        | 0        | 0        | 0        | 0 |
| DVL3-SMARCA4   | 0        | 0        | 0        | 0        | 0        | 0        | 0.274248 | 0 | 0 | 0 | 0        | 0        | 0        | 0        | 0        | 0        | 0        | 0 |
| FZD7-MYC       | 0        | 0        | 0        | 0        | 0        | 0        | 0        | 0 | 0 | 0 | 0        | 0        | 0        | 0        | 0.219427 | 0        | 0        | 0 |
| CDH1-LRP6      | 0        | 0        | 0        | 0        | 0        | 0        | 0        | 0 | 0 | 0 | 0        | 0        | 0        | 0        | 0.237298 | 0        | 0        | 0 |
| JAG2-MAP2K2    | 0        | 0.274336 | 0        | 0        | 0        | 0        | 0        | 0 | 0 | 0 | 0        | 0        | 0        | 0        | 0        | 0        | 0        | 0 |
| PIK3CA-VHL     | 0        | 0        | 0        | 0        | 0.728948 | 0        | 0        | 0 | 0 | 0 | 0        | 0        | 0        | 0        | 0        | 0        | 0        | 0 |
| CCND1-TGFA     | 0        | 0        | 0        | 0        | 0        | 0        | 0        | 0 | 0 | 0 | 0.214264 | 0        | 0        | 0        | 0        | 0        | 0        | 0 |
| E2F3-MGST2     | 0        | 0        | 0        | 0        | 0        | 0        | 0.275754 | 0 | 0 | 0 | 0        | 0        | 0        | 0        | 0        | 0        | 0        | 0 |
| BRAF-PTPN11    | 0        | 0        | 0        | 0.259011 | 0        | 0        | 0        | 0 | 0 | 0 | 0        | 0        | 0        | 0        | 0        | 0        | 0        | 0 |
| BCL2L1-RAC1    | 0        | 0        | 0        | 0        | 0        | 0        | 0        | 0 | 0 | 0 | 0.321857 | 0        | 0        | 0        | 0        | 0        | 0        | 0 |
| PDGFRA-SHC2    | 0        | 0        | 0        | 0        | 0        | 0.248559 | 0        | 0 | 0 | 0 | 0        | 0        | 0        | 0        | 0        | 0        | 0        | 0 |
| PDGFRA-SHC1    | 0        | 0        | 0        | 0        | 0        | 0.25402  | 0        | 0 | 0 | 0 | 0        | 0        | 0        | 0        | 0        | 0        | 0        | 0 |
| ARAF-HRAS      | 0        | 0.318407 | 0        | 0        | 0        | 0        | 0        | 0 | 0 | 0 | 0        | 0        | 0        | 0        | 0        | 0        | 0        | 0 |
| HGF-PDGFRB     | 0        | 0        | 0        | 0        | 0        | 0        | 0        | 0 | 0 | 0 | 0        | 0        | 0        | 0.226575 | 0        | 0        | 0        | 0 |
| GADD45B-MTOR   | 0        | 0.33866  | 0        | 0        | 0        | 0        | 0        | 0 | 0 | 0 | 0        | 0        | 0        | 0        | 0        | 0        | 0        | 0 |
| PIK3R2-SMARCA4 | 0        | 0        | 0        | 0        | 0        | 0.246567 | 0        | 0 | 0 | 0 | 0        | 0        | 0        | 0        | 0        | 0        | 0        | 0 |
| ARHGEF6-TGFB3  | 0        | 0        | 0        | 0        | 0        | 0        | 0        | 0 | 0 | 0 | 0.472678 | 0        | 0        | 0        | 0        | 0        | 0        | 0 |
| BAD-MAPK8      | 0        | 0        | 0        | 0        | 0        | 0        | 0        | 0 | 0 | 0 | 0.231333 | 0        | 0        | 0        | 0        | 0        | 0        | 0 |
| BAK1-POLK      | 0        | 0        | 0        | 0        | 0        | 0        | 0        | 0 | 0 | 0 | 0        | 0        | 0.479479 | 0        | 0        | 0        | 0        | 0 |
| GSTM1-GSTM2    | 0        | 0        | 0        | 0        | 0        | 0        | 0.390137 | 0 | 0 | 0 | 0        | 0        | 0        | 0        | 0        | 0        | 0        | 0 |
| E2F3-FLT4      | 0        | 0.284758 | 0        | 0        | 0        | 0        | 0        | 0 | 0 | 0 | 0        | 0        | 0        | 0        | 0        | 0        | 0        | 0 |
| AKT3-IKKB      | 0        | 0        | 0        | 0        | 0        | 0        | 0        | 0 | 0 | 0 | 0.316045 | 0        | 0        | 0        | 0        | 0        | 0        | 0 |
| APC2-RALGDS    | 0        | 0        | 0.32266  | 0        | 0        | 0        | 0        | 0 | 0 | 0 | 0        | 0        | 0        | 0        | 0        | 0        | 0        | 0 |
| EGF-PLCG2      | 0        | 0        | 0        | 0        | 0        | 0.230478 | 0        | 0 | 0 | 0 | 0        | 0        | 0        | 0        | 0        | 0        | 0        | 0 |
| NOTCH1-NOTCH3  | 0        | 0.827043 | 0        | 0        | 0        | 0        | 0        | 0 | 0 | 0 | 0        | 0        | 0        | 0        | 0        | 0        | 0        | 0 |
| APPL1-MAPK1    | 0        | 0        | 0.496331 | 0        | 0        | 0        | 0        | 0 | 0 | 0 | 0        | 0        | 0        | 0        | 0        | 0        | 0        | 0 |
| LEF1-TGFB1     | 0        | 0        | 0        | 0        | 0        | 0        | 0        | 0 | 0 | 0 | 0        | 0        | 0        | 0        | 0.200741 | 0        | 0        | 0 |
| HRAS-ILK       | 0        | 0        | 0        | 0        | 0        | 0        | 0        | 0 | 0 | 0 | 0        | 0        | 0        | 0        | 0        | 0        | 0.772703 | 0 |
| MDM2-RB1       | 0        | 0        | 0        | 0        | 0        | 0        | 0        | 0 | 0 | 0 | 0.414735 | 0        | 0        | 0        | 0        | 0        | 0        | 0 |
| ACTL6A-FZD1    | 0        | 0        | 0        | 0        | 0        | 0.463282 | 0        | 0 | 0 | 0 | 0        | 0        | 0        | 0        | 0        | 0        | 0        | 0 |
| ARAF-SHC2      | 0        | 0.202796 | 0        | 0        | 0        | 0        | 0        | 0 | 0 | 0 | 0        | 0        | 0        | 0        | 0        | 0        | 0        | 0 |
| CDH1-EGFR      | 0        | 0        | 0        | 0        | 0        | 0        | 0        | 0 | 0 | 0 | 0        | 0        | 0        | 0        | 0        | 0        | 0.200136 | 0 |
| CRKL-HGF       | 0        | 0        | 0        | 0.226094 | 0        | 0        | 0        | 0 | 0 | 0 | 0        | 0        | 0        | 0        | 0        | 0        | 0        | 0 |
| BRCA2-PIK3R1   | 0        | 0        | 0        | 0        | 0        | 0        | 0        | 0 | 0 | 0 | 0.286615 | 0        | 0        | 0        | 0        | 0        | 0        | 0 |
| FGF16-LEF1     | 0        | 0        | 0        | 0        | 0        | 0        | 0        | 0 | 0 | 0 | 0        | 0        | 0        | 0        | 0.207882 | 0        | 0        | 0 |
| BCL2L1-PLCG1   | 0        | 0        | 0        | 0        | 0        | 0.291396 | 0        | 0 | 0 | 0 | 0        | 0        | 0        | 0        | 0        | 0        | 0        | 0 |
| BCL2L1-E2F3    | 0        | 0        | 0        | 0        | 0        | 0.29089  | 0        | 0 | 0 | 0 | 0        | 0        | 0        | 0        | 0        | 0        | 0        | 0 |
| BCL2L1-E2F2    | 0        | 0        | 0        | 0        | 0        | 0.210148 | 0        | 0 | 0 | 0 | 0        | 0        | 0        | 0        | 0        | 0        | 0        | 0 |
| GADD45A-MYC    | 0        | 0        | 0        | 0        | 0        | 0        | 0        | 0 | 0 | 0 | 0        | 0        | 0        | 0        | 0        | 0.38444  | 0        | 0 |
| BAK1-SMARCE1   | 0        | 0        | 0        | 0        | 0        | 0.20245  | 0        | 0 | 0 | 0 | 0        | 0        | 0        | 0        | 0        | 0        | 0        | 0 |
| CTNNB1-GSK3B   | 0        | 0        | 0        | 0        | 0        | 0        | 0        | 0 | 0 | 0 | 0        | 0        | 0        | 0        | 0.749273 | 0        | 0        | 0 |
| AKT2-MAPK1     | 0        | 0        | 0        | 0        | 0        | 0        | 0        | 0 | 0 | 0 | 0        | 0.393183 | 0        | 0        | 0        | 0        | 0        | 0 |
| IKBKG-TCF7L1   | 0        | 0        | 0        | 0        | 0        | 0        | 0        | 0 | 0 | 0 | 0        | 0.225835 | 0        | 0        | 0        | 0        | 0        | 0 |
| PIK3R2-TCF7L2  | 0        | 0        | 0        | 0        | 0        | 0        | 0        | 0 | 0 | 0 | 0        | 0        | 0        | 0.25074  | 0        | 0        | 0        | 0 |
| MAPK3-RAC1     | 0        | 0        | 0.214194 | 0        | 0        | 0        | 0        | 0 | 0 | 0 | 0        | 0        | 0        | 0        | 0        | 0        | 0        | 0 |
| AKT2-DVL1      | 0        | 0        | 0        | 0        | 0        | 0        | 0.431115 | 0 | 0 | 0 | 0        | 0        | 0        | 0        | 0        | 0        | 0        | 0 |
| CCDC6-NCOA4    | 0        | 0        | 0        | 0        | 0        | 0        | 0        | 0 | 0 | 0 | 0        | 0        | 0        | 0        | 0        | 0.2253   | 0        | 0 |
| RXR2-TCF7L2    | 0        | 0        | 0        | 0        | 0        | 0        | 0        | 0 | 0 | 0 | 0        | 0        | 0        | 0        | 0.299019 | 0        | 0        | 0 |
| AXIN2-TCF7L2   | 0        | 0.221547 | 0        | 0        | 0        | 0        | 0        | 0 | 0 | 0 | 0        | 0        | 0        | 0        | 0        | 0        | 0        | 0 |
| RXR2-TCF7L1    | 0        | 0        | 0        | 0        | 0        | 0        | 0        | 0 | 0 | 0 | 0        | 0        | 0        | 0        | 0        | 0.225262 | 0        | 0 |
| CDKN1A-E2F3    | 0.240949 | 0        | 0        | 0        | 0        | 0        | 0        | 0 | 0 | 0 | 0        | 0        | 0        | 0        | 0        | 0        | 0        | 0 |
| FH-TGFA        | 0        | 0        | 0        | 0        | 0.318654 | 0        | 0        | 0 | 0 | 0 | 0        | 0        | 0        | 0        | 0        | 0        | 0        | 0 |
| EGLN2-PRCC     | 0        | 0        | 0        | 0.216179 | 0        | 0        | 0        | 0 | 0 | 0 | 0        | 0        | 0        | 0        | 0        | 0        | 0        | 0 |
| CTNNB1-HSP90B1 | 0        | 0        | 0        | 0        | 0        | 0        | 0        | 0 | 0 | 0 | 0        | 0.444463 | 0        | 0        | 0        | 0        | 0        | 0 |
| PIK3CB-TGFB1   | 0        | 0        | 0        | 0        | 0.23545  | 0        | 0        | 0 | 0 | 0 | 0        | 0        | 0        | 0        | 0        | 0        | 0        | 0 |
| DVL1-NCOA3     | 0        | 0.58984  | 0        | 0        | 0        | 0        | 0        | 0 | 0 | 0 | 0        | 0        | 0        | 0        | 0        | 0        | 0        | 0 |
| ACTB-TGFB2     | 0        | 0        | 0        | 0        | 0        | 0        | 0.218876 | 0 | 0 | 0 | 0        | 0        | 0        | 0        | 0        | 0        | 0        | 0 |
| DVL2-MAPK3     | 0        | 0        | 0        | 0        | 0        | 0        | 0.406745 | 0 | 0 | 0 | 0        | 0        | 0        | 0        | 0        | 0        | 0        | 0 |
| APC-LRP6       | 0        | 0.446219 | 0        | 0        | 0        | 0        | 0        | 0 | 0 | 0 | 0        | 0        | 0        | 0        | 0        | 0        | 0        | 0 |
| NOTCH3-SHC1    | 0        | 0.417357 | 0        | 0        | 0        | 0        | 0        | 0 | 0 | 0 | 0        | 0        | 0        | 0        | 0        | 0        | 0        | 0 |
| MAP2K2-SHC2    | 0        | 0        | 0        | 0        | 0        | 0.284935 | 0        | 0 | 0 | 0 | 0        | 0        | 0        | 0        | 0        | 0        | 0        | 0 |
| AKT3-ARNT      | 0        | 0        | 0        | 0.310825 | 0        | 0        | 0        | 0 | 0 | 0 | 0        | 0        | 0        | 0        | 0        | 0        | 0        | 0 |
| DLL4-HEYL      | 0        | 0.574532 | 0        | 0        | 0        | 0        | 0        | 0 | 0 | 0 | 0        | 0        | 0        | 0        | 0        | 0        | 0        | 0 |
| PDGFRB-SRD5A2  | 0        | 0        | 0        | 0        | 0        | 0        | 0        | 0 | 0 | 0 | 0        | 0.235763 | 0        | 0        | 0        | 0        | 0        | 0 |
| APPL1-SMAD2    | 0        | 0        | 0.203419 | 0        | 0        | 0        | 0        | 0 | 0 | 0 | 0        | 0        | 0        | 0        | 0        | 0        | 0        | 0 |
| AKT1-TGFB1     | 0        | 0        | 0        | 0.276105 | 0        | 0        | 0        | 0 | 0 | 0 | 0        | 0        | 0        | 0        | 0        | 0        | 0        | 0 |
| FLCN-RBX1      | 0        | 0        | 0        | 0        | 0.256108 | 0        | 0        | 0 | 0 | 0 | 0        | 0        | 0        | 0        | 0        | 0        | 0        | 0 |
| AKT2-ARNT2     | 0        | 0        | 0        | 0        | 0.20464  | 0        | 0        | 0 | 0 | 0 | 0        | 0        | 0        | 0        | 0        | 0        | 0        | 0 |
| MAP2K1-PMAIP1  | 0        | 0        | 0.395946 | 0        | 0        | 0        | 0        | 0 | 0 | 0 | 0        | 0        | 0        | 0        | 0        | 0        | 0        | 0 |
| CTNNA1-PIK3R3  | 0        | 0        | 0        | 0        | 0        | 0        | 0        | 0 | 0 | 0 | 0        | 0        | 0        | 0        | 0        | 0        | 0.334132 | 0 |
| AKT2-TGFB2     | 0        | 0        | 0        | 0        | 0.244281 | 0        | 0        | 0 | 0 | 0 | 0        | 0        | 0        | 0        | 0        | 0        | 0        | 0 |
| AKT2-TGFB1     | 0        | 0        | 0        | 0        | 0        | 0        | 0        | 0 | 0 | 0 | 0.29181  | 0        | 0        | 0        | 0        | 0        | 0        | 0 |
| MAPK1-SMARCB1  | 0        | 0        | 0        | 0        | 0        | 0        | 1.263248 | 0 | 0 | 0 | 0        | 0        | 0        | 0        | 0        | 0        | 0        | 0 |
| CCNE1-E2F3     | 0        | 0        | 0        | 0        | 0        | 0        | 0        | 0 | 0 | 0 | 0        | 0        | 0        | 0        | 0.346549 | 0        | 0        | 0 |
| BAD-SMAD2      | 0        | 0        | 0        | 0        | 0        | 0        | 0        | 0 | 0 | 0 | 0.283732 | 0        | 0        | 0        | 0        | 0        | 0        | 0 |





|                |   |          |          |          |          |          |          |          |          |          |          |          |          |   |          |   |   |
|----------------|---|----------|----------|----------|----------|----------|----------|----------|----------|----------|----------|----------|----------|---|----------|---|---|
| ARID1A-GAB1    | 0 | 0        | 0        | 0        | 0        | 0.356176 | 0        | 0        | 0        | 0        | 0        | 0        | 0        | 0 | 0        | 0 | 0 |
| NRAS-PAK4      | 0 | 0        | 0        | 0.511263 | 0        | 0        | 0        | 0        | 0        | 0        | 0        | 0        | 0        | 0 | 0        | 0 | 0 |
| E2F1-LRP5      | 0 | 0        | 0        | 0        | 0        | 0        | 0        | 0        | 0        | 0        | 0        | 0        | 0.245844 | 0 | 0        | 0 | 0 |
| E2F3-PIK3CA    | 0 | 0        | 0        | 0        | 0        | 0        | 0        | 0        | 0        | 0        | 0        | 0        | 0.391086 | 0 | 0        | 0 | 0 |
| EGFR-RAC1      | 0 | 0        | 0.448429 | 0        | 0        | 0        | 0        | 0        | 0        | 0        | 0        | 0        | 0        | 0 | 0        | 0 | 0 |
| AKT2-HGF       | 0 | 0        | 0        | 0        | 0.254002 | 0        | 0        | 0        | 0        | 0        | 0        | 0        | 0        | 0 | 0        | 0 | 0 |
| SMAD4-TGFBR2   | 0 | 0        | 0        | 0        | 0        | 0        | 0        | 0        | 0        | 0        | 0        | 0        | 0.22959  | 0 | 0        | 0 | 0 |
| MTOR-TGFA      | 0 | 0        | 0        | 0        | 0        | 0.302049 | 0        | 0        | 0        | 0        | 0        | 0        | 0        | 0 | 0        | 0 | 0 |
| SHC1-TCF7L2    | 0 | 0        | 0        | 0        | 0        | 0        | 0.224292 | 0        | 0        | 0        | 0        | 0        | 0        | 0 | 0        | 0 | 0 |
| ARID2-PBRM1    | 0 | 0        | 0        | 0        | 0        | 0.765713 | 0        | 0        | 0        | 0        | 0        | 0        | 0        | 0 | 0        | 0 | 0 |
| SMARCA2-TGFBR1 | 0 | 0        | 0        | 0        | 0        | 0.21069  | 0        | 0        | 0        | 0        | 0        | 0        | 0        | 0 | 0        | 0 | 0 |
| PIK3CA-STAT5B  | 0 | 0        | 0        | 0        | 0        | 0        | 0        | 0.31306  | 0        | 0        | 0        | 0        | 0        | 0 | 0        | 0 | 0 |
| CDK4-PLCG2     | 0 | 0        | 0        | 0        | 0        | 0.243586 | 0        | 0        | 0        | 0        | 0        | 0        | 0        | 0 | 0        | 0 | 0 |
| ACT16B-PRKCG   | 0 | 0        | 0        | 0        | 0        | 0.247208 | 0        | 0        | 0        | 0        | 0        | 0        | 0        | 0 | 0        | 0 | 0 |
| BCL2-NFKBIA    | 0 | 0        | 0        | 0        | 0        | 0        | 0        | 0        | 0        | 0        | 0.449374 | 0        | 0        | 0 | 0        | 0 | 0 |
| LEF1-TGFA      | 0 | 0        | 0        | 0        | 0        | 0        | 0        | 0        | 0        | 0.251887 | 0        | 0        | 0        | 0 | 0        | 0 | 0 |
| AKT3-SMARCB1   | 0 | 0        | 0        | 0        | 0        | 0.31392  | 0        | 0        | 0        | 0        | 0        | 0        | 0        | 0 | 0        | 0 | 0 |
| GSTA5-SMARCC1  | 0 | 0        | 0        | 0        | 0        | 0.213385 | 0        | 0        | 0        | 0        | 0        | 0        | 0        | 0 | 0        | 0 | 0 |
| PDGFB-RBX1     | 0 | 0        | 0        | 0.304646 | 0        | 0        | 0        | 0        | 0        | 0        | 0        | 0        | 0        | 0 | 0        | 0 | 0 |
| RPS6KB1-SMARCB | 0 | 0        | 0        | 0        | 0        | 0.28472  | 0        | 0        | 0        | 0        | 0        | 0        | 0        | 0 | 0        | 0 | 0 |
| DVL2-MGST1     | 0 | 0        | 0        | 0        | 0        | 0.210781 | 0        | 0        | 0        | 0        | 0        | 0        | 0        | 0 | 0        | 0 | 0 |
| E2F2-MAPK3     | 0 | 0        | 0        | 0        | 0.316515 | 0        | 0        | 0        | 0        | 0        | 0        | 0        | 0        | 0 | 0        | 0 | 0 |
| HRAS-NFE2L2    | 0 | 0        | 0        | 0        | 0        | 0.393917 | 0        | 0        | 0        | 0        | 0        | 0        | 0        | 0 | 0        | 0 | 0 |
| GSTO1-SMARCD1  | 0 | 0        | 0        | 0        | 0        | 0.457585 | 0        | 0        | 0        | 0        | 0        | 0        | 0        | 0 | 0        | 0 | 0 |
| CCND1-CYCS     | 0 | 0        | 0.244685 | 0        | 0        | 0        | 0        | 0        | 0        | 0        | 0        | 0        | 0        | 0 | 0        | 0 | 0 |
| FGFR1-FZD7     | 0 | 0.259438 | 0        | 0        | 0        | 0        | 0        | 0        | 0        | 0        | 0        | 0        | 0        | 0 | 0        | 0 | 0 |
| FGFR1-TCF7L1   | 0 | 0        | 0        | 0        | 0        | 0        | 0        | 0        | 0.91235  | 0        | 0        | 0        | 0        | 0 | 0        | 0 | 0 |
| PIK3R3-STAT3   | 0 | 0        | 0        | 0        | 0        | 0        | 0        | 0.310554 | 0        | 0        | 0        | 0        | 0        | 0 | 0        | 0 | 0 |
| E2F3-HRAS      | 0 | 0        | 0        | 0        | 0        | 0        | 0        | 0        | 0        | 0.404221 | 0        | 0        | 0        | 0 | 0        | 0 | 0 |
| PIK3R3-RELA    | 0 | 0        | 0        | 0        | 0        | 0        | 0        | 0        | 0.210041 | 0        | 0        | 0        | 0        | 0 | 0        | 0 | 0 |
| MAPK1-SOS2     | 0 | 0.351297 | 0        | 0        | 0        | 0        | 0        | 0        | 0        | 0        | 0        | 0        | 0        | 0 | 0        | 0 | 0 |
| RAPGEF1-TCEB1  | 0 | 0        | 0.404124 | 0        | 0        | 0        | 0        | 0        | 0        | 0        | 0        | 0        | 0        | 0 | 0        | 0 | 0 |
| MGST1-SMARCB1  | 0 | 0        | 0        | 0        | 0        | 0.200833 | 0        | 0        | 0        | 0        | 0        | 0        | 0        | 0 | 0        | 0 | 0 |
| BCL2L1-BRAF    | 0 | 0        | 0        | 0        | 0        | 0.266965 | 0        | 0        | 0        | 0        | 0        | 0        | 0        | 0 | 0        | 0 | 0 |
| APC-TXNRD2     | 0 | 0        | 0        | 0        | 0        | 0.272816 | 0        | 0        | 0        | 0        | 0        | 0        | 0        | 0 | 0        | 0 | 0 |
| PRKCB-RASSF5   | 0 | 0        | 0        | 0        | 0        | 0        | 0        | 0.230141 | 0        | 0        | 0        | 0        | 0        | 0 | 0        | 0 | 0 |
| GSTA1-GSTA2    | 0 | 0        | 0        | 0        | 0        | 0.221235 | 0        | 0        | 0        | 0        | 0        | 0        | 0        | 0 | 0        | 0 | 0 |
| GSTA2-SMAD2    | 0 | 0        | 0        | 0        | 0        | 0.208939 | 0        | 0        | 0        | 0        | 0        | 0        | 0        | 0 | 0        | 0 | 0 |
| FGF19-FGF20    | 0 | 0        | 0        | 0        | 0        | 0        | 0        | 0        | 0        | 0.374275 | 0        | 0        | 0        | 0 | 0        | 0 | 0 |
| BAX-WNT3       | 0 | 0        | 0        | 0        | 0        | 0.23875  | 0        | 0        | 0        | 0        | 0        | 0        | 0        | 0 | 0        | 0 | 0 |
| PLCG2-STK4     | 0 | 0        | 0        | 0        | 0        | 0        | 0.462608 | 0        | 0        | 0        | 0        | 0        | 0        | 0 | 0        | 0 | 0 |
| DLL4-GADD45B   | 0 | 0.206262 | 0        | 0        | 0        | 0        | 0        | 0        | 0        | 0        | 0        | 0        | 0        | 0 | 0        | 0 | 0 |
| MTOR-SHC2      | 0 | 0        | 0        | 0        | 0.369386 | 0        | 0        | 0        | 0        | 0        | 0        | 0        | 0        | 0 | 0        | 0 | 0 |
| ESR2-SOS1      | 0 | 0.219671 | 0        | 0        | 0        | 0        | 0        | 0        | 0        | 0        | 0        | 0        | 0        | 0 | 0        | 0 | 0 |
| AXIN1-CASP3    | 0 | 0        | 0.24093  | 0        | 0        | 0        | 0        | 0        | 0        | 0        | 0        | 0        | 0        | 0 | 0        | 0 | 0 |
| FZD6-PIK3R1    | 0 | 0        | 0        | 0        | 0        | 0        | 0        | 0        | 0        | 0        | 0        | 0.462659 | 0        | 0 | 0        | 0 | 0 |
| AXIN1-PTEN     | 0 | 0.362481 | 0        | 0        | 0        | 0        | 0        | 0        | 0        | 0        | 0        | 0        | 0        | 0 | 0        | 0 | 0 |
| FGF1-GAB1      | 0 | 0        | 0        | 0        | 0        | 0        | 0        | 0        | 0        | 0        | 0        | 0.208689 | 0        | 0 | 0        | 0 | 0 |
| MSH2-PIK3R3    | 0 | 0        | 0.276769 | 0        | 0        | 0        | 0        | 0        | 0        | 0        | 0        | 0        | 0        | 0 | 0        | 0 | 0 |
| CREB3-EP300    | 0 | 0        | 0        | 0        | 0        | 0        | 0        | 0        | 0.290069 | 0        | 0        | 0        | 0        | 0 | 0        | 0 | 0 |
| BRAF-DVL2      | 0 | 0        | 0        | 0        | 0        | 0        | 0        | 0        | 0        | 0        | 0.25888  | 0        | 0        | 0 | 0        | 0 | 0 |
| FRAT1-MAPK3    | 0 | 0.722949 | 0        | 0        | 0        | 0        | 0        | 0        | 0        | 0        | 0        | 0        | 0        | 0 | 0        | 0 | 0 |
| MYC-TP53       | 0 | 0        | 0        | 0        | 0.221203 | 0        | 0        | 0        | 0        | 0        | 0        | 0        | 0        | 0 | 0        | 0 | 0 |
| CDKN1A-EML4    | 0 | 0        | 0        | 0        | 0        | 0        | 0.25597  | 0        | 0        | 0        | 0        | 0        | 0        | 0 | 0        | 0 | 0 |
| MAPK1-TPR      | 0 | 0        | 0        | 0        | 0        | 0        | 0        | 0        | 0        | 0        | 0        | 0.236418 | 0        | 0 | 0        | 0 | 0 |
| E2F2-RB1       | 0 | 0.286811 | 0        | 0        | 0        | 0        | 0        | 0        | 0        | 0        | 0        | 0        | 0        | 0 | 0        | 0 | 0 |
| JAK1-MAPK1     | 0 | 0        | 0        | 0        | 0        | 0        | 0        | 0.240121 | 0        | 0        | 0        | 0        | 0        | 0 | 0        | 0 | 0 |
| DDB2-SMAD2     | 0 | 0        | 0.22293  | 0        | 0        | 0        | 0        | 0        | 0        | 0        | 0        | 0        | 0        | 0 | 0        | 0 | 0 |
| IGF1-MAPK1     | 0 | 0        | 0        | 0        | 0        | 0        | 0        | 0        | 0.219266 | 0        | 0        | 0        | 0        | 0 | 0        | 0 | 0 |
| PLCG1-PRKCB    | 0 | 0        | 0        | 0        | 0        | 0        | 0        | 0.227037 | 0        | 0        | 0        | 0        | 0        | 0 | 0        | 0 | 0 |
| NOTCH4-WNT9B   | 0 | 0.224567 | 0        | 0        | 0        | 0        | 0        | 0        | 0        | 0        | 0        | 0        | 0        | 0 | 0        | 0 | 0 |
| CDKN1A-CTNNA1  | 0 | 0        | 0        | 0        | 0        | 0        | 0        | 0        | 0        | 0        | 0        | 0        | 0        | 0 | 0.321856 | 0 | 0 |
| GSTM2-GSTM4    | 0 | 0        | 0        | 0        | 0        | 0.376982 | 0        | 0        | 0        | 0        | 0        | 0        | 0        | 0 | 0        | 0 | 0 |
| APPL1-MAPK8    | 0 | 0        | 0.411486 | 0        | 0        | 0        | 0        | 0        | 0        | 0        | 0        | 0        | 0        | 0 | 0        | 0 | 0 |
| E2F1-FZD5      | 0 | 0        | 0        | 0        | 0        | 0        | 0        | 0        | 0        | 0        | 0.20771  | 0        | 0        | 0 | 0        | 0 | 0 |
| E2F1-PDGFC     | 0 | 0        | 0        | 0        | 0        | 0        | 0        | 0        | 0        | 0.277612 | 0        | 0        | 0        | 0 | 0        | 0 | 0 |
| CDKN1A-FOS     | 0 | 0        | 0.284398 | 0        | 0        | 0        | 0        | 0        | 0        | 0        | 0        | 0        | 0        | 0 | 0        | 0 | 0 |
| BAX-FRAT1      | 0 | 0        | 0        | 0        | 0        | 0        | 0        | 0        | 0        | 0        | 0.325803 | 0        | 0        | 0 | 0        | 0 | 0 |
| E2F3-IGF1R     | 0 | 0        | 0        | 0        | 0        | 0        | 0        | 0        | 0        | 0.275056 | 0        | 0        | 0        | 0 | 0        | 0 | 0 |
| PLCG2-RB1      | 0 | 0        | 0        | 0        | 0        | 0.457316 | 0        | 0        | 0        | 0        | 0        | 0        | 0        | 0 | 0        | 0 | 0 |
| CDKN1A-RAC2    | 0 | 0        | 0.206981 | 0        | 0        | 0        | 0        | 0        | 0        | 0        | 0        | 0        | 0        | 0 | 0        | 0 | 0 |
| IGF1R-PDPK1    | 0 | 0        | 0        | 0        | 0        | 0        | 0        | 0        | 0.224895 | 0        | 0        | 0        | 0        | 0 | 0        | 0 | 0 |
| SRD5A2-ZEB1    | 0 | 0        | 0        | 0        | 0        | 0        | 0        | 0        | 0.245354 | 0        | 0        | 0        | 0        | 0 | 0        | 0 | 0 |
| AKT2-SOS1      | 0 | 0        | 0        | 0        | 0        | 0        | 0        | 0        | 0        | 0        | 0.306655 | 0        | 0        | 0 | 0        | 0 | 0 |
| AKT2-SOS2      | 0 | 0        | 0        | 0        | 0        | 0        | 0        | 0        | 0        | 0        | 0.200741 | 0        | 0        | 0 | 0        | 0 | 0 |
| ARAF-HGF       | 0 | 0        | 0        | 0.246081 | 0        | 0        | 0        | 0        | 0        | 0        | 0        | 0        | 0        | 0 | 0        | 0 | 0 |
| APC2-CDK2      | 0 | 0        | 0        | 0        | 0        | 0        | 0        | 0        | 0        | 0        | 0        | 0.2288   | 0        | 0 | 0        | 0 | 0 |

|                |   |          |          |          |          |          |          |          |          |          |          |          |          |          |          |   |   |
|----------------|---|----------|----------|----------|----------|----------|----------|----------|----------|----------|----------|----------|----------|----------|----------|---|---|
| CDK2-EP300     | 0 | 0        | 0        | 0        | 0        | 0        | 0        | 0        | 0        | 0        | 0        | 0.478744 | 0        | 0        | 0        | 0 | 0 |
| FGF2-NOTCH3    | 0 | 0.274212 | 0        | 0        | 0        | 0        | 0        | 0        | 0        | 0        | 0        | 0        | 0        | 0        | 0        | 0 | 0 |
| GADD45G-PIK3R1 | 0 | 0        | 0        | 0        | 0        | 0.275182 | 0        | 0        | 0        | 0        | 0        | 0        | 0        | 0        | 0        | 0 | 0 |
| JAG2-NOTCH4    | 0 | 0.327322 | 0        | 0        | 0        | 0        | 0        | 0        | 0        | 0        | 0        | 0        | 0        | 0        | 0        | 0 | 0 |
| BAK1-CAMK2G    | 0 | 0        | 0        | 0        | 0        | 0.480602 | 0        | 0        | 0        | 0        | 0        | 0        | 0        | 0        | 0        | 0 | 0 |
| JAG2-NOTCH1    | 0 | 0.634204 | 0        | 0        | 0        | 0        | 0        | 0        | 0        | 0        | 0        | 0        | 0        | 0        | 0        | 0 | 0 |
| DDB2-FZD6      | 0 | 0.22096  | 0        | 0        | 0        | 0        | 0        | 0        | 0        | 0        | 0        | 0        | 0        | 0        | 0        | 0 | 0 |
| POLK-VEGFA     | 0 | 0        | 0        | 0        | 0        | 0        | 0        | 0        | 0        | 0        | 0.214147 | 0        | 0        | 0        | 0        | 0 | 0 |
| RAC2-RELA      | 0 | 0        | 0        | 0        | 0        | 0        | 0        | 0        | 0        | 0        | 0.332777 | 0        | 0        | 0        | 0        | 0 | 0 |
| APC-CDK4       | 0 | 0.25947  | 0        | 0        | 0        | 0        | 0        | 0        | 0        | 0        | 0        | 0        | 0        | 0        | 0        | 0 | 0 |
| GADD45A-PIK3R1 | 0 | 0        | 0        | 0        | 0        | 0.301507 | 0        | 0        | 0        | 0        | 0        | 0        | 0        | 0        | 0        | 0 | 0 |
| GADD45A-PIK3R3 | 0 | 0        | 0.297827 | 0        | 0        | 0        | 0        | 0        | 0        | 0        | 0        | 0        | 0        | 0        | 0        | 0 | 0 |
| PIK3R2-PTEN    | 0 | 0        | 0        | 0        | 0        | 0        | 0        | 0        | 0        | 0        | 0.313772 | 0        | 0        | 0        | 0        | 0 | 0 |
| PIK3CB-RAC3    | 0 | 0        | 0        | 0        | 0        | 0        | 0        | 0        | 0        | 0        | 0.2411   | 0        | 0        | 0        | 0        | 0 | 0 |
| IKBK-MDM2      | 0 | 0        | 0        | 0        | 0        | 0        | 0        | 0        | 0        | 0        | 0.449012 | 0        | 0        | 0        | 0        | 0 | 0 |
| MTOR-NRAS      | 0 | 0        | 0        | 0        | 0        | 0.998451 | 0        | 0        | 0        | 0        | 0        | 0        | 0        | 0        | 0        | 0 | 0 |
| MAPK8-NFKB1    | 0 | 0        | 0        | 0        | 0        | 0        | 0        | 0        | 0        | 0.293029 | 0        | 0        | 0        | 0        | 0        | 0 | 0 |
| AXIN1-HRAS     | 0 | 0        | 0.339606 | 0        | 0        | 0        | 0        | 0        | 0        | 0        | 0        | 0        | 0        | 0        | 0        | 0 | 0 |
| E2F3-SMARCC1   | 0 | 0        | 0        | 0        | 0        | 0.371242 | 0        | 0        | 0        | 0        | 0        | 0        | 0        | 0        | 0        | 0 | 0 |
| BAK1-BRAF      | 0 | 0        | 0        | 0        | 0        | 0        | 0        | 0        | 0        | 0        | 0        | 0        | 0.217863 | 0        | 0        | 0 | 0 |
| CREB3-PTEN     | 0 | 0        | 0        | 0        | 0        | 0        | 0        | 0        | 0        | 0        | 0.215879 | 0        | 0        | 0        | 0        | 0 | 0 |
| AKT2-POLK      | 0 | 0.226742 | 0        | 0        | 0        | 0        | 0        | 0        | 0        | 0        | 0        | 0        | 0        | 0        | 0        | 0 | 0 |
| NCOA1-PIK3R2   | 0 | 0.330081 | 0        | 0        | 0        | 0        | 0        | 0        | 0        | 0        | 0        | 0        | 0        | 0        | 0        | 0 | 0 |
| DVL2-PLCG1     | 0 | 0        | 0        | 0        | 0        | 0.40284  | 0        | 0        | 0        | 0        | 0        | 0        | 0        | 0        | 0        | 0 | 0 |
| POLK-TXNRD1    | 0 | 0        | 0        | 0        | 0        | 0.379376 | 0        | 0        | 0        | 0        | 0        | 0        | 0        | 0        | 0        | 0 | 0 |
| PIK3CB-SOS1    | 0 | 0        | 0        | 0        | 0        | 0        | 0        | 0.374261 | 0        | 0        | 0        | 0        | 0        | 0        | 0        | 0 | 0 |
| AKT2-RXR-1     | 0 | 0        | 0        | 0        | 0        | 0        | 0        | 0        | 0        | 0        | 0        | 0        | 0.506974 | 0        | 0        | 0 | 0 |
| AKT1-LRP5      | 0 | 0        | 0        | 0        | 0        | 0.615569 | 0        | 0        | 0        | 0        | 0        | 0        | 0        | 0        | 0        | 0 | 0 |
| FZD1-NCOA3     | 0 | 0.256191 | 0        | 0        | 0        | 0        | 0        | 0        | 0        | 0        | 0        | 0        | 0        | 0        | 0        | 0 | 0 |
| EGLN2-PIK3CD   | 0 | 0        | 0        | 0        | 0.673545 | 0        | 0        | 0        | 0        | 0        | 0        | 0        | 0        | 0        | 0        | 0 | 0 |
| E2F3-RAF1      | 0 | 0.2615   | 0        | 0        | 0        | 0        | 0        | 0        | 0        | 0        | 0        | 0        | 0        | 0        | 0        | 0 | 0 |
| JAK3-MAP2K2    | 0 | 0        | 0        | 0        | 0        | 0.208356 | 0        | 0        | 0        | 0        | 0        | 0        | 0        | 0        | 0        | 0 | 0 |
| CCND1-TGFB1    | 0 | 0        | 0.368877 | 0        | 0        | 0        | 0        | 0        | 0        | 0        | 0        | 0        | 0        | 0        | 0        | 0 | 0 |
| LRP6-SP1       | 0 | 0.487495 | 0        | 0        | 0        | 0        | 0        | 0        | 0        | 0        | 0        | 0        | 0        | 0        | 0        | 0 | 0 |
| CDKN1A-SOS1    | 0 | 0        | 0        | 0        | 0        | 0        | 0        | 0        | 0        | 0        | 0        | 0        | 0.222209 | 0        | 0        | 0 | 0 |
| ERBB2-TGFA     | 0 | 0        | 0        | 0        | 0        | 0        | 0        | 0        | 0.424699 | 0        | 0        | 0        | 0        | 0        | 0        | 0 | 0 |
| ARID1A-DPF3    | 0 | 0        | 0        | 0        | 0        | 0.265947 | 0        | 0        | 0        | 0        | 0        | 0        | 0        | 0        | 0        | 0 | 0 |
| RAF1-SMARCC1   | 0 | 0        | 0        | 0        | 0        | 0.2058   | 0        | 0        | 0        | 0        | 0        | 0        | 0        | 0        | 0        | 0 | 0 |
| EML4-GADD45B   | 0 | 0        | 0        | 0        | 0        | 0        | 0.211789 | 0        | 0        | 0        | 0        | 0        | 0        | 0        | 0        | 0 | 0 |
| EML4-GADD45A   | 0 | 0        | 0        | 0        | 0        | 0.266666 | 0        | 0        | 0        | 0        | 0        | 0        | 0        | 0        | 0        | 0 | 0 |
| CDKN1A-FRAT2   | 0 | 0.244449 | 0        | 0        | 0        | 0        | 0        | 0        | 0        | 0        | 0        | 0        | 0        | 0        | 0        | 0 | 0 |
| PHF10-PIK3R1   | 0 | 0        | 0        | 0        | 0.343824 | 0        | 0        | 0        | 0        | 0        | 0        | 0        | 0        | 0        | 0        | 0 | 0 |
| AXIN2-MAP2K1   | 0 | 0        | 0        | 0        | 0        | 0        | 0        | 0        | 0        | 0        | 0        | 0.212451 | 0        | 0        | 0        | 0 | 0 |
| HEY1-WNT5B     | 0 | 0.209237 | 0        | 0        | 0        | 0        | 0        | 0        | 0        | 0        | 0        | 0        | 0        | 0        | 0        | 0 | 0 |
| BAX-HMOX1      | 0 | 0        | 0        | 0        | 0        | 0.203678 | 0        | 0        | 0        | 0        | 0        | 0        | 0        | 0        | 0        | 0 | 0 |
| CREB3L4-SOS2   | 0 | 0        | 0        | 0        | 0        | 0        | 0        | 0        | 0.254272 | 0        | 0        | 0        | 0        | 0        | 0        | 0 | 0 |
| CREBBP-FOXO1   | 0 | 0        | 0        | 0        | 0        | 0        | 0        | 0        | 0        | 0.331653 | 0        | 0        | 0        | 0        | 0        | 0 | 0 |
| SMAD4-TGFB1    | 0 | 0        | 0.262191 | 0        | 0        | 0        | 0        | 0        | 0        | 0        | 0        | 0        | 0        | 0        | 0        | 0 | 0 |
| AR-BAD         | 0 | 0        | 0        | 0        | 0        | 0        | 0        | 0        | 0        | 0.250307 | 0        | 0        | 0        | 0        | 0        | 0 | 0 |
| GADD45B-PIK3CA | 0 | 0        | 0        | 0        | 0        | 0        | 0        | 0        | 0        | 0        | 0        | 0.23293  | 0        | 0        | 0        | 0 | 0 |
| AKT3-PRKCB     | 0 | 0        | 0        | 0        | 0        | 0.225301 | 0        | 0        | 0        | 0        | 0        | 0        | 0        | 0        | 0        | 0 | 0 |
| KRAS-TCF7L2    | 0 | 0        | 0.664645 | 0        | 0        | 0        | 0        | 0        | 0        | 0        | 0        | 0        | 0        | 0        | 0        | 0 | 0 |
| SOS1-ZEB1      | 0 | 0        | 0        | 0        | 0        | 0        | 0        | 0        | 0        | 0.244656 | 0        | 0        | 0        | 0        | 0        | 0 | 0 |
| AR-ATF4        | 0 | 0        | 0        | 0        | 0        | 0        | 0        | 0        | 0        | 0.70701  | 0        | 0        | 0        | 0        | 0        | 0 | 0 |
| PIK3CB-STAT3   | 0 | 0        | 0        | 0        | 0        | 0        | 0        | 0.22325  | 0        | 0        | 0        | 0        | 0        | 0        | 0        | 0 | 0 |
| CTNNA1-POLK    | 0 | 0        | 0        | 0        | 0        | 0        | 0        | 0        | 0        | 0        | 0        | 0        | 0        | 0.491985 | 0        | 0 | 0 |
| BAK1-MLH1      | 0 | 0        | 0        | 0        | 0        | 0        | 0        | 0        | 0        | 0        | 0        | 0.283362 | 0        | 0        | 0        | 0 | 0 |
| FGF8-PIK3CD    | 0 | 0        | 0        | 0        | 0        | 0        | 0        | 0        | 0        | 0        | 0.206965 | 0        | 0        | 0        | 0        | 0 | 0 |
| SMARCE1-WNT3   | 0 | 0        | 0        | 0        | 0        | 0.340935 | 0        | 0        | 0        | 0        | 0        | 0        | 0        | 0        | 0        | 0 | 0 |
| BIRC5-CYCS     | 0 | 0        | 0.479879 | 0        | 0        | 0        | 0        | 0        | 0        | 0        | 0        | 0        | 0        | 0        | 0        | 0 | 0 |
| NOTCH1-NOTCH2  | 0 | 0.215271 | 0        | 0        | 0        | 0        | 0        | 0        | 0        | 0        | 0        | 0        | 0        | 0        | 0        | 0 | 0 |
| ERBB2-MAPK8    | 0 | 0        | 0        | 0        | 0        | 0        | 0        | 0        | 0.218913 | 0        | 0        | 0        | 0        | 0        | 0        | 0 | 0 |
| MTOR-RAC1      | 0 | 0        | 0.439059 | 0        | 0        | 0        | 0        | 0        | 0        | 0        | 0        | 0        | 0        | 0        | 0        | 0 | 0 |
| NOTCH1-NOTCH4  | 0 | 0.434663 | 0        | 0        | 0        | 0        | 0        | 0        | 0        | 0        | 0        | 0        | 0        | 0        | 0        | 0 | 0 |
| MAPK3-TP53     | 0 | 0        | 0        | 0        | 0        | 0        | 0        | 0        | 0        | 0        | 0        | 0        | 0        | 0        | 0.217224 | 0 | 0 |
| AXIN2-BRD7     | 0 | 0        | 0        | 0        | 0        | 0.204619 | 0        | 0        | 0        | 0        | 0        | 0        | 0        | 0        | 0        | 0 | 0 |
| PDGFD-TCF7     | 0 | 0        | 0        | 0        | 0        | 0        | 0        | 0        | 0        | 0.239281 | 0        | 0        | 0        | 0        | 0        | 0 | 0 |
| APPL1-RAF1     | 0 | 0        | 0.272237 | 0        | 0        | 0        | 0        | 0        | 0        | 0        | 0        | 0        | 0        | 0        | 0        | 0 | 0 |
| PIK3CD-PTEN    | 0 | 0        | 0        | 0        | 0        | 0        | 0        | 0        | 0        | 0        | 0.352813 | 0        | 0        | 0        | 0        | 0 | 0 |
| ACTG1-SMARCD2  | 0 | 0        | 0        | 0        | 0        | 0.209906 | 0        | 0        | 0        | 0        | 0        | 0        | 0        | 0        | 0        | 0 | 0 |
| ERBB2-RXRA     | 0 | 0        | 0        | 0        | 0        | 0        | 0        | 0.202247 | 0        | 0        | 0        | 0        | 0        | 0        | 0        | 0 | 0 |
| AKT2-PLCG1     | 0 | 0        | 0        | 0        | 0        | 0.976745 | 0        | 0        | 0        | 0        | 0        | 0        | 0        | 0        | 0        | 0 | 0 |
| ERBB2-JUP      | 0 | 0        | 0        | 0        | 0        | 0        | 0        | 0        | 0        | 0        | 0        | 0.434853 | 0        | 0        | 0        | 0 | 0 |
| E2F3-ELK1      | 0 | 0        | 0        | 0        | 0        | 0.319492 | 0        | 0        | 0        | 0        | 0        | 0        | 0        | 0        | 0        | 0 | 0 |
| FLCN-TGFB2     | 0 | 0        | 0        | 0.211492 | 0        | 0        | 0        | 0        | 0        | 0        | 0        | 0        | 0        | 0        | 0        | 0 | 0 |
| POLK-RPS6KB1   | 0 | 0        | 0        | 0        | 0        | 0.267348 | 0        | 0        | 0        | 0        | 0        | 0        | 0        | 0        | 0        | 0 | 0 |
| IGF1R-TCF7     | 0 | 0        | 0        | 0        | 0        | 0        | 0        | 0        | 0        | 0        | 0.201862 | 0        | 0        | 0        | 0        | 0 | 0 |









|                 |          |          |          |          |          |          |          |   |          |          |          |          |          |          |          |   |   |          |   |
|-----------------|----------|----------|----------|----------|----------|----------|----------|---|----------|----------|----------|----------|----------|----------|----------|---|---|----------|---|
| AKT1-PIK3CD     | 0        | 0        | 0        | 0        | 0        | 0        | 0        | 0 | 0        | 0        | 0        | 0        | 0        | 0        | 0.501915 | 0 | 0 | 0        | 0 |
| FLCN-TCEB1      | 0        | 0        | 0        | 0        | 0.216643 | 0        | 0        | 0 | 0        | 0        | 0        | 0        | 0        | 0        | 0        | 0 | 0 | 0        | 0 |
| EML4-PIK3R1     | 0        | 0        | 0        | 0        | 0        | 0        | 0        | 0 | 0        | 0.227877 | 0        | 0        | 0        | 0        | 0        | 0 | 0 | 0        | 0 |
| BAD-CREB3       | 0        | 0        | 0        | 0        | 0        | 0        | 0        | 0 | 0        | 0        | 0        | 0        | 0.283944 | 0        | 0        | 0 | 0 | 0        | 0 |
| NOTCH1-SP1      | 0        | 0.20095  | 0        | 0        | 0        | 0        | 0        | 0 | 0        | 0        | 0        | 0        | 0        | 0        | 0        | 0 | 0 | 0        | 0 |
| EGFR-PLCG1      | 0        | 0        | 0        | 0        | 0        | 0.393895 | 0        | 0 | 0        | 0        | 0        | 0        | 0        | 0        | 0        | 0 | 0 | 0        | 0 |
| CSNK1A1-KRAS    | 0        | 0.390744 | 0        | 0        | 0        | 0        | 0        | 0 | 0        | 0        | 0        | 0        | 0        | 0        | 0        | 0 | 0 | 0        | 0 |
| CSNK1A1-CSNK1A1 | 0        | 0.610189 | 0        | 0        | 0        | 0        | 0        | 0 | 0        | 0        | 0        | 0        | 0        | 0        | 0        | 0 | 0 | 0        | 0 |
| EGF-MAPK3       | 0        | 0        | 0        | 0        | 0        | 0        | 0        | 0 | 0        | 0        | 0        | 0        | 0.220693 | 0        | 0        | 0 | 0 | 0        | 0 |
| HIF1A-NRAS      | 0        | 0        | 0        | 0        | 0.368707 | 0        | 0        | 0 | 0        | 0        | 0        | 0        | 0        | 0        | 0        | 0 | 0 | 0        | 0 |
| DDB2-ILK        | 0        | 0        | 0        | 0        | 0        | 0        | 0        | 0 | 0        | 0        | 0        | 0        | 0        | 0        | 0        | 0 | 0 | 0.486468 | 0 |
| PIK3CA-WNT9A    | 0        | 0.209413 | 0        | 0        | 0        | 0        | 0        | 0 | 0        | 0        | 0        | 0        | 0        | 0        | 0        | 0 | 0 | 0        | 0 |
| PIK3R1-RAC1     | 0        | 0        | 0.32382  | 0        | 0        | 0        | 0        | 0 | 0        | 0        | 0        | 0        | 0        | 0        | 0        | 0 | 0 | 0        | 0 |
| FZD2-TCF7L2     | 0        | 0.240442 | 0        | 0        | 0        | 0        | 0        | 0 | 0        | 0        | 0        | 0        | 0        | 0        | 0        | 0 | 0 | 0        | 0 |
| GAB1-RXRA       | 0        | 0        | 0        | 0        | 0        | 0        | 0        | 0 | 0        | 0        | 0        | 0        | 0        | 0        | 0.315798 | 0 | 0 | 0        | 0 |
| TGFBR2-TP53     | 0        | 0        | 0        | 0        | 0        | 0        | 0        | 0 | 0        | 0        | 0        | 0        | 0        | 0        | 0.236492 | 0 | 0 | 0        | 0 |
| GSTO2-SMARCD2   | 0        | 0        | 0        | 0        | 0        | 0.204828 | 0        | 0 | 0        | 0        | 0        | 0        | 0        | 0        | 0        | 0 | 0 | 0        | 0 |
| RAF1-TGFBR2     | 0        | 0        | 0        | 0        | 0        | 0        | 0        | 0 | 0        | 0        | 0.281806 | 0        | 0        | 0        | 0        | 0 | 0 | 0        | 0 |
| GADD45B-SMAD4   | 0        | 0        | 0.202369 | 0        | 0        | 0        | 0        | 0 | 0        | 0        | 0        | 0        | 0        | 0        | 0        | 0 | 0 | 0        | 0 |
| EGLN3-TGFA      | 0        | 0        | 0        | 0.480744 | 0        | 0        | 0        | 0 | 0        | 0        | 0        | 0        | 0        | 0        | 0        | 0 | 0 | 0        | 0 |
| MAPK1-TXNRD1    | 0        | 0        | 0        | 0        | 0        | 0        | 0.356327 | 0 | 0        | 0        | 0        | 0        | 0        | 0        | 0        | 0 | 0 | 0        | 0 |
| DLL4-MAP2K1     | 0        | 0.254354 | 0        | 0        | 0        | 0        | 0        | 0 | 0        | 0        | 0        | 0        | 0        | 0        | 0        | 0 | 0 | 0        | 0 |
| SPINT1-ZEB1     | 0        | 0        | 0        | 0        | 0        | 0        | 0        | 0 | 0        | 0        | 0        | 0        | 0.526372 | 0        | 0        | 0 | 0 | 0        | 0 |
| CDK6-MAP2K1     | 0        | 0        | 0        | 0        | 0        | 0        | 0        | 0 | 0        | 0        | 0        | 0        | 0        | 0.291923 | 0        | 0 | 0 | 0        | 0 |
| EGF-EGFR        | 0        | 0        | 0        | 0        | 0        | 0        | 0        | 0 | 0        | 0        | 0        | 0        | 0.264206 | 0        | 0        | 0 | 0 | 0        | 0 |
| FZD4-WNT3       | 0        | 0.206376 | 0        | 0        | 0        | 0        | 0        | 0 | 0        | 0        | 0        | 0        | 0        | 0        | 0        | 0 | 0 | 0        | 0 |
| GADD45G-RALB    | 0        | 0        | 0        | 0        | 0        | 0        | 0        | 0 | 0        | 0        | 0.514907 | 0        | 0        | 0        | 0        | 0 | 0 | 0        | 0 |
| ARAF-PTEN       | 0        | 0        | 0        | 0        | 0        | 0        | 0        | 0 | 0        | 0        | 0        | 0        | 0.293578 | 0        | 0        | 0 | 0 | 0        | 0 |
| GADD45G-RALA    | 0        | 0        | 0        | 0        | 0        | 0        | 0        | 0 | 0        | 0        | 0.310088 | 0        | 0        | 0        | 0        | 0 | 0 | 0        | 0 |
| PIK3CD-VEGFA    | 0        | 0        | 0        | 0        | 0.230737 | 0        | 0        | 0 | 0        | 0        | 0        | 0        | 0        | 0        | 0        | 0 | 0 | 0        | 0 |
| TGFB1-TGFB2     | 0        | 0        | 0        | 0        | 0        | 0        | 0        | 0 | 0        | 0        | 0.369174 | 0        | 0        | 0        | 0        | 0 | 0 | 0        | 0 |
| E2F3-PIK3R3     | 0        | 0        | 0        | 0        | 0        | 0.391709 | 0        | 0 | 0        | 0        | 0        | 0        | 0        | 0        | 0        | 0 | 0 | 0        | 0 |
| MGST3-SMARCC1   | 0        | 0        | 0        | 0        | 0        | 0        | 0.473907 | 0 | 0        | 0        | 0        | 0        | 0        | 0        | 0        | 0 | 0 | 0        | 0 |
| ARAF-EGFR       | 0        | 0        | 0        | 0        | 0        | 0        | 0        | 0 | 0        | 0        | 0        | 0        | 0.202544 | 0        | 0        | 0 | 0 | 0        | 0 |
| E2F2-FGF21      | 0        | 0        | 0        | 0        | 0        | 0        | 0        | 0 | 0        | 0        | 0        | 0        | 0.288156 | 0        | 0        | 0 | 0 | 0        | 0 |
| PDGFB-PLCG2     | 0        | 0        | 0        | 0        | 0        | 0.743532 | 0        | 0 | 0        | 0        | 0        | 0        | 0        | 0        | 0        | 0 | 0 | 0        | 0 |
| CAMK2D-EGF      | 0        | 0        | 0        | 0        | 0        | 0.292136 | 0        | 0 | 0        | 0        | 0        | 0        | 0        | 0        | 0        | 0 | 0 | 0        | 0 |
| EGFR-GAB1       | 0        | 0        | 0        | 0        | 0        | 0        | 0        | 0 | 0        | 0        | 0        | 0        | 0        | 0        | 0.327461 | 0 | 0 | 0        | 0 |
| FGFR3-SRC       | 0.216608 | 0        | 0        | 0        | 0        | 0        | 0        | 0 | 0        | 0        | 0        | 0        | 0        | 0        | 0        | 0 | 0 | 0        | 0 |
| ARAF-DVL3       | 0        | 0        | 0        | 0        | 0        | 0        | 0.732242 | 0 | 0        | 0        | 0        | 0        | 0        | 0        | 0        | 0 | 0 | 0        | 0 |
| BBC3-RALGDS     | 0        | 0        | 0.211853 | 0        | 0        | 0        | 0        | 0 | 0        | 0        | 0        | 0        | 0        | 0        | 0        | 0 | 0 | 0        | 0 |
| BAD-BAX         | 0        | 0        | 0        | 0        | 0        | 0        | 0        | 0 | 0        | 0        | 0        | 0        | 0.572199 | 0        | 0        | 0 | 0 | 0        | 0 |
| GADD45B-MAPK3   | 0        | 0.243835 | 0        | 0        | 0        | 0        | 0        | 0 | 0        | 0        | 0        | 0        | 0        | 0        | 0        | 0 | 0 | 0        | 0 |
| APC-PTEN        | 0        | 0        | 0        | 0        | 0        | 0        | 0.207482 | 0 | 0        | 0        | 0        | 0        | 0        | 0        | 0        | 0 | 0 | 0        | 0 |
| DVL3-E2F3       | 0        | 0.457267 | 0        | 0        | 0        | 0        | 0        | 0 | 0        | 0        | 0        | 0        | 0        | 0        | 0        | 0 | 0 | 0        | 0 |
| ARHGAP6-JAK1    | 0        | 0        | 0        | 0        | 0        | 0        | 0        | 0 | 0        | 0        | 0.659505 | 0        | 0        | 0        | 0        | 0 | 0 | 0        | 0 |
| BAD-MTOR        | 0        | 0        | 0.508638 | 0        | 0        | 0        | 0        | 0 | 0        | 0        | 0        | 0        | 0        | 0        | 0        | 0 | 0 | 0        | 0 |
| ARAF-FGF7       | 0        | 0        | 0        | 0        | 0        | 0        | 0        | 0 | 0        | 0        | 0        | 0        | 0.337213 | 0        | 0        | 0 | 0 | 0        | 0 |
| ARNT-BRAF       | 0        | 0        | 0        | 0        | 0.233508 | 0        | 0        | 0 | 0        | 0        | 0        | 0        | 0        | 0        | 0        | 0 | 0 | 0        | 0 |
| ELK1-SMARCD1    | 0        | 0        | 0        | 0        | 0        | 0        | 0.202405 | 0 | 0        | 0        | 0        | 0        | 0        | 0        | 0        | 0 | 0 | 0        | 0 |
| PMAP1-TGFA      | 0        | 0        | 0.206645 | 0        | 0        | 0        | 0        | 0 | 0        | 0        | 0        | 0        | 0        | 0        | 0        | 0 | 0 | 0        | 0 |
| ETS1-VEGFA      | 0        | 0        | 0        | 0        | 0.259874 | 0        | 0        | 0 | 0        | 0        | 0        | 0        | 0        | 0        | 0        | 0 | 0 | 0        | 0 |
| CREB1-NRAS      | 0        | 0        | 0        | 0        | 0        | 0        | 0        | 0 | 0        | 0        | 0        | 0.490842 | 0        | 0        | 0        | 0 | 0 | 0        | 0 |
| FGF1-NRAS       | 0        | 0        | 0        | 0        | 0        | 0        | 0        | 0 | 0        | 0        | 0        | 0        | 0.338607 | 0        | 0        | 0 | 0 | 0        | 0 |
| APC-AXIN1       | 0        | 0.206435 | 0        | 0        | 0        | 0        | 0        | 0 | 0        | 0        | 0        | 0        | 0        | 0        | 0        | 0 | 0 | 0        | 0 |
| MGST3-MTOR      | 0        | 0        | 0        | 0        | 0        | 0        | 0.256206 | 0 | 0        | 0        | 0        | 0        | 0        | 0        | 0        | 0 | 0 | 0        | 0 |
| CDK6-JAG1       | 0        | 0.274682 | 0        | 0        | 0        | 0        | 0        | 0 | 0        | 0        | 0        | 0        | 0        | 0        | 0        | 0 | 0 | 0        | 0 |
| CDH17-MAPK3     | 0        | 0        | 0        | 0        | 0        | 0        | 0        | 0 | 0        | 0        | 0        | 0        | 0        | 0        | 0.20117  | 0 | 0 | 0        | 0 |
| CALM2-TP53      | 0        | 0        | 0        | 0        | 0        | 0.252933 | 0        | 0 | 0        | 0        | 0        | 0        | 0        | 0        | 0        | 0 | 0 | 0        | 0 |
| EGFR-EP300      | 0        | 0        | 0        | 0        | 0        | 0        | 0        | 0 | 0        | 0        | 0        | 0.401948 | 0        | 0        | 0        | 0 | 0 | 0        | 0 |
| PIK3CD-WNT10B   | 0        | 0        | 0        | 0        | 0        | 0.215238 | 0        | 0 | 0        | 0        | 0        | 0        | 0        | 0        | 0        | 0 | 0 | 0        | 0 |
| GSK3B-MYC       | 0        | 0        | 0        | 0        | 0        | 0.230412 | 0        | 0 | 0        | 0        | 0        | 0        | 0        | 0        | 0        | 0 | 0 | 0        | 0 |
| ACTL6A-POLK     | 0        | 0        | 0        | 0        | 0        | 0        | 0.267612 | 0 | 0        | 0        | 0        | 0        | 0        | 0        | 0        | 0 | 0 | 0        | 0 |
| AKT1-FGFR1      | 0        | 0        | 0        | 0        | 0        | 0        | 0        | 0 | 0        | 0        | 0        | 0        | 0.227045 | 0        | 0        | 0 | 0 | 0        | 0 |
| FZD5-NRAS       | 0        | 0        | 0        | 0        | 0        | 0.679686 | 0        | 0 | 0        | 0        | 0        | 0        | 0        | 0        | 0        | 0 | 0 | 0        | 0 |
| HSP90B1-TCF7L1  | 0        | 0        | 0        | 0        | 0        | 0        | 0        | 0 | 0        | 0        | 0        | 0.363527 | 0        | 0        | 0        | 0 | 0 | 0        | 0 |
| CHUK-MAP2K2     | 0        | 0        | 0        | 0        | 0        | 0        | 0        | 0 | 0        | 0        | 0        | 0.431825 | 0        | 0        | 0        | 0 | 0 | 0        | 0 |
| FGF17-FGF20     | 0        | 0        | 0        | 0        | 0        | 0        | 0        | 0 | 0        | 0        | 0        | 0        | 0.228528 | 0        | 0        | 0 | 0 | 0        | 0 |
| FGF17-FGF21     | 0        | 0        | 0        | 0        | 0        | 0        | 0        | 0 | 0        | 0        | 0        | 0        | 0.209273 | 0        | 0        | 0 | 0 | 0        | 0 |
| MET-TFE3        | 0        | 0        | 0        | 0        | 0.268299 | 0        | 0        | 0 | 0        | 0        | 0        | 0        | 0        | 0        | 0        | 0 | 0 | 0        | 0 |
| EML4-RXRA       | 0        | 0        | 0        | 0        | 0        | 0        | 0        | 0 | 0.317282 | 0        | 0        | 0        | 0        | 0        | 0        | 0 | 0 | 0        | 0 |
| CCND1-TP53      | 0        | 0        | 0        | 0        | 0        | 0        | 0        | 0 | 0        | 0        | 0        | 0        | 0.393975 | 0        | 0        | 0 | 0 | 0        | 0 |
| ARID1B-SOS2     | 0        | 0        | 0        | 0        | 0        | 0.561814 | 0        | 0 | 0        | 0        | 0        | 0        | 0        | 0        | 0        | 0 | 0 | 0        | 0 |
| BAD-TGFBR2      | 0        | 0        | 0        | 0        | 0        | 0        | 0.273496 | 0 | 0        | 0        | 0        | 0        | 0        | 0        | 0        | 0 | 0 | 0        | 0 |
| MAPK1-NCOA3     | 0        | 0.236352 | 0        | 0        | 0        | 0        | 0        | 0 | 0        | 0        | 0        | 0        | 0        | 0        | 0        | 0 | 0 | 0        | 0 |
| FZD3-RPS6KB1    | 0        | 0        | 0        | 0        | 0        | 0        | 0        | 0 | 0        | 0        | 0        | 0        | 0        | 0.212692 | 0        | 0 | 0 | 0        | 0 |
| BRCA2-MTOR      | 0        | 0        | 0        | 0        | 0        | 0        | 0        | 0 | 0        | 0        | 0.24452  | 0        | 0        | 0        | 0        | 0 | 0 | 0        | 0 |

|                |   |          |          |          |          |          |          |          |          |          |          |          |          |          |          |          |          |   |
|----------------|---|----------|----------|----------|----------|----------|----------|----------|----------|----------|----------|----------|----------|----------|----------|----------|----------|---|
| POLK-RXRA      | 0 | 0        | 0        | 0        | 0        | 0        | 0        | 0        | 0        | 0        | 0        | 0        | 0        | 0        | 0        | 0.283993 | 0        | 0 |
| KRAS-SP1       | 0 | 0.208094 | 0        | 0        | 0        | 0        | 0        | 0        | 0        | 0        | 0        | 0        | 0        | 0        | 0        | 0        | 0        | 0 |
| ACTL6B-TGFBR2  | 0 | 0        | 0        | 0        | 0        | 0        | 0.222836 | 0        | 0        | 0        | 0        | 0        | 0        | 0        | 0        | 0        | 0        | 0 |
| BCL2-CDKN1B    | 0 | 0        | 0        | 0        | 0        | 0        | 0        | 0        | 0        | 0        | 0        | 0        | 0        | 0        | 0        | 0.221465 | 0        | 0 |
| ARNT2-TGFB2    | 0 | 0        | 0        | 0        | 0.233647 | 0        | 0        | 0        | 0        | 0        | 0        | 0        | 0        | 0        | 0        | 0        | 0        | 0 |
| ARRHGF6-TGFBR2 | 0 | 0        | 0        | 0        | 0        | 0        | 0        | 0        | 0        | 0.566706 | 0        | 0        | 0        | 0        | 0        | 0        | 0        | 0 |
| GRB2-HMOX1     | 0 | 0        | 0        | 0        | 0        | 0        | 0.214251 | 0        | 0        | 0        | 0        | 0        | 0        | 0        | 0        | 0        | 0        | 0 |
| ERG-HSP90AA1   | 0 | 0        | 0        | 0        | 0        | 0        | 0        | 0        | 0        | 0        | 0        | 0.232039 | 0        | 0        | 0        | 0        | 0        | 0 |
| CAMK2D-GADD45  | 0 | 0        | 0        | 0        | 0        | 0.407357 | 0        | 0        | 0        | 0        | 0        | 0        | 0        | 0        | 0        | 0        | 0        | 0 |
| PRKCB-RB1      | 0 | 0        | 0        | 0        | 0        | 0        | 0        | 0.392244 | 0        | 0        | 0        | 0        | 0        | 0        | 0        | 0        | 0        | 0 |
| FRAT1-SOS1     | 0 | 0.244216 | 0        | 0        | 0        | 0        | 0        | 0        | 0        | 0        | 0        | 0        | 0        | 0        | 0        | 0        | 0        | 0 |
| PIK3CB-RASSF1  | 0 | 0        | 0        | 0        | 0        | 0        | 0        | 0        | 0        | 0.295604 | 0        | 0        | 0        | 0        | 0        | 0        | 0        | 0 |
| FGFR1-NRAS     | 0 | 0        | 0        | 0        | 0        | 0        | 0        | 0        | 0        | 0        | 0        | 0        | 0.239846 | 0        | 0        | 0        | 0        | 0 |
| E2F2-NOTCH1    | 0 | 0.305027 | 0        | 0        | 0        | 0        | 0        | 0        | 0        | 0        | 0        | 0        | 0        | 0        | 0        | 0        | 0        | 0 |
| AKT2-CDKN1A    | 0 | 0        | 0        | 0        | 0        | 0.34732  | 0        | 0        | 0        | 0        | 0        | 0        | 0        | 0        | 0        | 0        | 0        | 0 |
| AKT2-FLCN      | 0 | 0        | 0.468868 | 0        | 0        | 0        | 0        | 0        | 0        | 0        | 0        | 0        | 0        | 0        | 0        | 0        | 0        | 0 |
| CDK6-MYC       | 0 | 0        | 0        | 0        | 0        | 0        | 0.288344 | 0        | 0        | 0        | 0        | 0        | 0        | 0        | 0        | 0        | 0        | 0 |
| AKT3-DDB2      | 0 | 0        | 0        | 0        | 0        | 0.204137 | 0        | 0        | 0        | 0        | 0        | 0        | 0        | 0        | 0        | 0        | 0        | 0 |
| CREB3-PDPK1    | 0 | 0        | 0        | 0        | 0        | 0        | 0        | 0        | 0        | 0        | 0        | 0.358158 | 0        | 0        | 0        | 0        | 0        | 0 |
| CCND1-MAP2K1   | 0 | 0        | 0        | 0        | 0        | 0        | 0        | 0        | 0        | 0        | 0        | 0        | 0        | 0.294681 | 0        | 0        | 0        | 0 |
| CHUK-HRAS      | 0 | 0        | 0        | 0        | 0        | 0        | 0        | 0        | 0        | 0        | 0        | 0        | 0.627169 | 0        | 0        | 0        | 0        | 0 |
| CDK6-E2F1      | 0 | 0        | 0        | 0        | 0        | 0        | 0        | 0        | 0        | 0        | 0        | 0        | 0        | 0.332004 | 0        | 0        | 0        | 0 |
| SLC2A1-VEGFA   | 0 | 0        | 0        | 0.314745 | 0        | 0        | 0        | 0        | 0        | 0        | 0        | 0        | 0        | 0        | 0        | 0        | 0        | 0 |
| MAPK1-RAPGEF1  | 0 | 0        | 0        | 0.569616 | 0        | 0        | 0        | 0        | 0        | 0        | 0        | 0        | 0        | 0        | 0        | 0        | 0        | 0 |
| CTNNA1-FZD7    | 0 | 0.209072 | 0        | 0        | 0        | 0        | 0        | 0        | 0        | 0        | 0        | 0        | 0        | 0        | 0        | 0        | 0        | 0 |
| JAK3-RASSF5    | 0 | 0        | 0        | 0        | 0        | 0        | 0        | 0.242178 | 0        | 0        | 0        | 0        | 0        | 0        | 0        | 0        | 0        | 0 |
| MTOR-PLCG2     | 0 | 0        | 0        | 0        | 0        | 0        | 0.387234 | 0        | 0        | 0        | 0        | 0        | 0        | 0        | 0        | 0        | 0        | 0 |
| FGF7-RXRA      | 0 | 0        | 0        | 0        | 0        | 0        | 0        | 0        | 0        | 0        | 0        | 0        | 0        | 0        | 0.28897  | 0        | 0        | 0 |
| ARAF-KLK3      | 0 | 0        | 0        | 0        | 0        | 0        | 0        | 0        | 0        | 0        | 0        | 0.241497 | 0        | 0        | 0        | 0        | 0        | 0 |
| FZD1-SMARCD3   | 0 | 0        | 0        | 0        | 0        | 0        | 0.284299 | 0        | 0        | 0        | 0        | 0        | 0        | 0        | 0        | 0        | 0        | 0 |
| FZD1-SMARCD1   | 0 | 0        | 0        | 0        | 0        | 0        | 0.205897 | 0        | 0        | 0        | 0        | 0        | 0        | 0        | 0        | 0        | 0        | 0 |
| ARID1B-ARID2   | 0 | 0        | 0        | 0        | 0        | 0        | 0.286538 | 0        | 0        | 0        | 0        | 0        | 0        | 0        | 0        | 0        | 0        | 0 |
| E2F3-SMARCD1   | 0 | 0        | 0        | 0        | 0        | 0        | 0.401843 | 0        | 0        | 0        | 0        | 0        | 0        | 0        | 0        | 0        | 0        | 0 |
| MGST1-SMAD2    | 0 | 0        | 0        | 0        | 0        | 0        | 0.216299 | 0        | 0        | 0        | 0        | 0        | 0        | 0        | 0        | 0        | 0        | 0 |
| BCL2-POLK      | 0 | 0        | 0        | 0        | 0        | 0        | 0        | 0        | 0        | 0        | 0        | 0        | 0        | 0        | 0.234513 | 0        | 0        | 0 |
| CHUK-PTEN      | 0 | 0        | 0        | 0        | 0        | 0        | 0        | 0        | 0        | 0        | 0        | 0.212609 | 0        | 0        | 0        | 0        | 0        | 0 |
| GADD45B-NCOA3  | 0 | 0.381601 | 0        | 0        | 0        | 0        | 0        | 0        | 0        | 0        | 0        | 0        | 0        | 0        | 0        | 0        | 0        | 0 |
| CDKN1A-MYC     | 0 | 0        | 0.204453 | 0        | 0        | 0        | 0        | 0        | 0        | 0        | 0        | 0        | 0        | 0        | 0        | 0        | 0        | 0 |
| CCND1-PIK3CD   | 0 | 0        | 0        | 0        | 0        | 0        | 0        | 0        | 0        | 0        | 0        | 0        | 0.510632 | 0        | 0        | 0        | 0        | 0 |
| ARAF-PDPK1     | 0 | 0        | 0        | 0        | 0        | 0        | 0        | 0        | 0        | 0        | 0        | 0        | 0        | 0        | 0        | 0        | 0.420862 | 0 |
| CRK-ETS1       | 0 | 0        | 0        | 0.416034 | 0        | 0        | 0        | 0        | 0        | 0        | 0        | 0        | 0        | 0        | 0        | 0        | 0        | 0 |
| NFKB2-POLK     | 0 | 0.297361 | 0        | 0        | 0        | 0        | 0        | 0        | 0        | 0        | 0        | 0        | 0        | 0        | 0        | 0        | 0        | 0 |
| FH-VEGFA       | 0 | 0        | 0.361067 | 0        | 0        | 0        | 0        | 0        | 0        | 0        | 0        | 0        | 0        | 0        | 0        | 0        | 0        | 0 |
| ARID2-SMARCC2  | 0 | 0        | 0        | 0        | 0        | 0        | 1.517487 | 0        | 0        | 0        | 0        | 0        | 0        | 0        | 0        | 0        | 0        | 0 |
| APC-TCF7L1     | 0 | 0.353417 | 0        | 0        | 0        | 0        | 0        | 0        | 0        | 0        | 0        | 0        | 0        | 0        | 0        | 0        | 0        | 0 |
| FZD4-NOTCH4    | 0 | 0.440069 | 0        | 0        | 0        | 0        | 0        | 0        | 0        | 0        | 0        | 0        | 0        | 0        | 0        | 0        | 0        | 0 |
| DVL2-HES1      | 0 | 0.247464 | 0        | 0        | 0        | 0        | 0        | 0        | 0        | 0        | 0        | 0        | 0        | 0        | 0        | 0        | 0        | 0 |
| PRKCG-SHC1     | 0 | 0        | 0        | 0        | 0.213343 | 0        | 0        | 0        | 0        | 0        | 0        | 0        | 0        | 0        | 0        | 0        | 0        | 0 |
| AKT3-SMAD2     | 0 | 0        | 0        | 0        | 0        | 0        | 0        | 0        | 0        | 0.580062 | 0        | 0        | 0        | 0        | 0        | 0        | 0        | 0 |
| AKT3-SMAD4     | 0 | 0        | 0        | 0        | 0        | 0        | 0.245055 | 0        | 0        | 0        | 0        | 0        | 0        | 0        | 0        | 0        | 0        | 0 |
| PIK3R1-RARB    | 0 | 0        | 0        | 0        | 0        | 0        | 0        | 0        | 0.210204 | 0        | 0        | 0        | 0        | 0        | 0        | 0        | 0        | 0 |
| RALB-TGFB2     | 0 | 0        | 0        | 0        | 0        | 0        | 0        | 0        | 0        | 0.229797 | 0        | 0        | 0        | 0        | 0        | 0        | 0        | 0 |
| FGF2-FRAT2     | 0 | 0.26924  | 0        | 0        | 0        | 0        | 0        | 0        | 0        | 0        | 0        | 0        | 0        | 0        | 0        | 0        | 0        | 0 |
| FGF10-FGF18    | 0 | 0        | 0        | 0        | 0        | 0        | 0        | 0        | 0        | 0        | 0        | 0        | 0.212272 | 0        | 0        | 0        | 0        | 0 |
| AR-PDPK1       | 0 | 0        | 0        | 0        | 0        | 0        | 0        | 0        | 0        | 0        | 0.88426  | 0        | 0        | 0        | 0        | 0        | 0        | 0 |
| DVL2-LRP5      | 0 | 0.22391  | 0        | 0        | 0        | 0        | 0        | 0        | 0        | 0        | 0        | 0        | 0        | 0        | 0        | 0        | 0        | 0 |
| MDM2-SHC2      | 0 | 0        | 0        | 0        | 0.206464 | 0        | 0        | 0        | 0        | 0        | 0        | 0        | 0        | 0        | 0        | 0        | 0        | 0 |
| FRAT2-SHC2     | 0 | 0.207275 | 0        | 0        | 0        | 0        | 0        | 0        | 0        | 0        | 0        | 0        | 0        | 0        | 0        | 0        | 0        | 0 |
| FRAT2-SHC1     | 0 | 0        | 0        | 0        | 0        | 0        | 0.20014  | 0        | 0        | 0        | 0        | 0        | 0        | 0        | 0        | 0        | 0        | 0 |
| CDK4-STK4      | 0 | 0        | 0        | 0        | 0        | 0        | 0        | 0        | 0        | 0.3094   | 0        | 0        | 0        | 0        | 0        | 0        | 0        | 0 |
| BAD-CHUK       | 0 | 0        | 0        | 0        | 0        | 0        | 0        | 0        | 0        | 0        | 0.458757 | 0        | 0        | 0        | 0        | 0        | 0        | 0 |
| AKT3-FGF21     | 0 | 0        | 0        | 0        | 0        | 0        | 0        | 0        | 0        | 0        | 0        | 0        | 0.307934 | 0        | 0        | 0        | 0        | 0 |
| FGFR1-HRAS     | 0 | 0        | 0        | 0        | 0        | 0        | 0        | 0        | 0        | 0        | 0        | 0        | 0.231488 | 0        | 0        | 0        | 0        | 0 |
| BRCA2-NOTCH1   | 0 | 0.251054 | 0        | 0        | 0        | 0        | 0        | 0        | 0        | 0        | 0        | 0        | 0        | 0        | 0        | 0        | 0        | 0 |
| RAC1-RAD51     | 0 | 0        | 0        | 0        | 0        | 0        | 0        | 0        | 0        | 0.256026 | 0        | 0        | 0        | 0        | 0        | 0        | 0        | 0 |
| CYCS-PIK3R3    | 0 | 0        | 0.206969 | 0        | 0        | 0        | 0        | 0        | 0        | 0        | 0        | 0        | 0        | 0        | 0        | 0        | 0        | 0 |
| MITF-PDGFC     | 0 | 0        | 0        | 0        | 0        | 0        | 0        | 0        | 0        | 0        | 0        | 0        | 0.281348 | 0        | 0        | 0        | 0        | 0 |
| BAK1-MET       | 0 | 0        | 0        | 0        | 0        | 0.201719 | 0        | 0        | 0        | 0        | 0        | 0        | 0        | 0        | 0        | 0        | 0        | 0 |
| NOTCH4-PIK3CB  | 0 | 0.270211 | 0        | 0        | 0        | 0        | 0        | 0        | 0        | 0        | 0        | 0        | 0        | 0        | 0        | 0        | 0        | 0 |
| NCOA3-SOS1     | 0 | 0.720006 | 0        | 0        | 0        | 0        | 0        | 0        | 0        | 0        | 0        | 0        | 0        | 0        | 0        | 0        | 0        | 0 |
| PDGFRB-TP53    | 0 | 0        | 0        | 0        | 0        | 0        | 0        | 0        | 0        | 0        | 0        | 0        | 0        | 0.248175 | 0        | 0        | 0        | 0 |
| CREB3L2-MTOR   | 0 | 0        | 0        | 0        | 0        | 0        | 0        | 0        | 0        | 0        | 0        | 0.632002 | 0        | 0        | 0        | 0        | 0        | 0 |
| APC-NOTCH2     | 0 | 0.495638 | 0        | 0        | 0        | 0        | 0        | 0        | 0        | 0        | 0        | 0        | 0        | 0        | 0        | 0        | 0        | 0 |
| APC-NOTCH1     | 0 | 0.404033 | 0        | 0        | 0        | 0        | 0        | 0        | 0        | 0        | 0        | 0        | 0        | 0        | 0        | 0        | 0        | 0 |
| AR-CREBBP      | 0 | 0        | 0        | 0        | 0        | 0        | 0        | 0        | 0        | 0        | 0        | 0.838774 | 0        | 0        | 0        | 0        | 0        | 0 |
| DLL1-FRAT2     | 0 | 0.238087 | 0        | 0        | 0        | 0        | 0        | 0        | 0        | 0        | 0        | 0        | 0        | 0        | 0        | 0        | 0        | 0 |
| JUP-RAF1       | 0 | 0        | 0        | 0        | 0        | 0        | 0        | 0        | 0        | 0        | 0        | 0        | 0        | 0        | 0.359143 | 0        | 0        | 0 |



|                 |   |          |          |          |          |          |          |         |          |          |          |          |          |          |   |   |         |          |   |
|-----------------|---|----------|----------|----------|----------|----------|----------|---------|----------|----------|----------|----------|----------|----------|---|---|---------|----------|---|
| BCL2-MAPK1      | 0 | 0        | 0.286626 | 0        | 0        | 0        | 0        | 0       | 0        | 0        | 0        | 0        | 0        | 0        | 0 | 0 | 0       | 0        | 0 |
| DVL2-GADD45A    | 0 | 0        | 0        | 0        | 0        | 0        | 0.23997  | 0       | 0        | 0        | 0        | 0        | 0        | 0        | 0 | 0 | 0       | 0        | 0 |
| FH-RAP1A        | 0 | 0        | 0        | 0        | 0.208487 | 0        | 0        | 0       | 0        | 0        | 0        | 0        | 0        | 0        | 0 | 0 | 0       | 0        | 0 |
| FGF8-PIK3R1     | 0 | 0        | 0        | 0        | 0        | 0        | 0        | 0       | 0        | 0        | 0        | 0        | 0.220709 | 0        | 0 | 0 | 0       | 0        | 0 |
| RAP1B-RAPGEF1   | 0 | 0        | 0        | 0.320826 | 0        | 0        | 0        | 0       | 0        | 0        | 0        | 0        | 0        | 0        | 0 | 0 | 0       | 0        | 0 |
| FGF7-GADD45B    | 0 | 0        | 0        | 0        | 0        | 0        | 0        | 0       | 0        | 0        | 0        | 0        | 0        | 0.303577 | 0 | 0 | 0       | 0        | 0 |
| CRK-TCEB1       | 0 | 0        | 0        | 0        | 0.221097 | 0        | 0        | 0       | 0        | 0        | 0        | 0        | 0        | 0        | 0 | 0 | 0       | 0        | 0 |
| CDK4-CDKN1A     | 0 | 0        | 0        | 0        | 0        | 0        | 0        | 0       | 0        | 0.261137 | 0        | 0        | 0        | 0        | 0 | 0 | 0       | 0        | 0 |
| E2F3-MAP2K1     | 0 | 0        | 0        | 0        | 0        | 0        | 0.23553  | 0       | 0        | 0        | 0        | 0        | 0        | 0        | 0 | 0 | 0       | 0        | 0 |
| ACTL6A-MAP2K1   | 0 | 0        | 0        | 0        | 0        | 0        | 0.229089 | 0       | 0        | 0        | 0        | 0        | 0        | 0        | 0 | 0 | 0       | 0        | 0 |
| PAK4-RAF1       | 0 | 0        | 0        | 0.223273 | 0        | 0        | 0        | 0       | 0        | 0        | 0        | 0        | 0        | 0        | 0 | 0 | 0       | 0        | 0 |
| MAPK10-TGFB3    | 0 | 0        | 0        | 0        | 0        | 0        | 0        | 0       | 0        | 0.222512 | 0        | 0        | 0        | 0        | 0 | 0 | 0       | 0        | 0 |
| POLK-TPR        | 0 | 0        | 0        | 0        | 0        | 0        | 0        | 0       | 0        | 0        | 0        | 0        | 0        | 0        | 0 | 0 | 0.20924 | 0        | 0 |
| GADD45A-STAT5B  | 0 | 0        | 0        | 0        | 0        | 0        | 0        | 0       | 0.203231 | 0        | 0        | 0        | 0        | 0        | 0 | 0 | 0       | 0        | 0 |
| CDKN1B-DVL2     | 0 | 0        | 0        | 0        | 0        | 0        | 0        | 0       | 0        | 0        | 0        | 0        | 0        | 0.280497 | 0 | 0 | 0       | 0        | 0 |
| TCF7L1-TXNRD1   | 0 | 0        | 0        | 0        | 0        | 0        | 0.25632  | 0       | 0        | 0        | 0        | 0        | 0        | 0        | 0 | 0 | 0       | 0        | 0 |
| CDKN1A-SMAD4    | 0 | 0        | 0.244522 | 0        | 0        | 0        | 0        | 0       | 0        | 0        | 0        | 0        | 0        | 0        | 0 | 0 | 0       | 0        | 0 |
| SOS1-WNT5A      | 0 | 0.218167 | 0        | 0        | 0        | 0        | 0        | 0       | 0        | 0        | 0        | 0        | 0        | 0        | 0 | 0 | 0       | 0        | 0 |
| CDKN1A-SMAD3    | 0 | 0        | 0        | 0        | 0        | 0        | 0        | 0       | 0        | 0        | 0        | 0        | 0        | 0.310751 | 0 | 0 | 0       | 0        | 0 |
| BIRC5-TGFB2     | 0 | 0        | 0.371177 | 0        | 0        | 0        | 0        | 0       | 0        | 0        | 0        | 0        | 0        | 0        | 0 | 0 | 0       | 0        | 0 |
| AXIN1-LRP5      | 0 | 0        | 0        | 0        | 0        | 0        | 0        | 0       | 0        | 0        | 0        | 0        | 0        | 0.242158 | 0 | 0 | 0       | 0        | 0 |
| AXIN1-AXIN2     | 0 | 0        | 0        | 0        | 0        | 0        | 0        | 0       | 0        | 0        | 0        | 0        | 0        | 0.24774  | 0 | 0 | 0       | 0        | 0 |
| BAK1-DVL1       | 0 | 0        | 0        | 0        | 0        | 0        | 0        | 0       | 0        | 0        | 0        | 0        | 0        | 0.315203 | 0 | 0 | 0       | 0        | 0 |
| CDK4-MAP2K2     | 0 | 0        | 0        | 0        | 0        | 0        | 0.275285 | 0       | 0        | 0        | 0        | 0        | 0        | 0        | 0 | 0 | 0       | 0        | 0 |
| PIK3R1-PIK3R2   | 0 | 0.228314 | 0        | 0        | 0        | 0        | 0        | 0       | 0        | 0        | 0        | 0        | 0        | 0        | 0 | 0 | 0       | 0        | 0 |
| BAD-E2F1        | 0 | 0        | 0        | 0        | 0        | 0        | 0        | 0       | 0        | 0        | 0        | 0.315354 | 0        | 0        | 0 | 0 | 0       | 0        | 0 |
| PIK3R2-SLC2A1   | 0 | 0        | 0        | 0.235486 | 0        | 0        | 0        | 0       | 0        | 0        | 0        | 0        | 0        | 0        | 0 | 0 | 0       | 0        | 0 |
| BAD-E2F2        | 0 | 0        | 0        | 0        | 0        | 0        | 0        | 0       | 0        | 0        | 0        | 0        | 0.38811  | 0        | 0 | 0 | 0       | 0        | 0 |
| AKT2-ETS1       | 0 | 0        | 0.289118 | 0        | 0        | 0        | 0        | 0       | 0        | 0        | 0        | 0        | 0        | 0        | 0 | 0 | 0       | 0        | 0 |
| PIK3R1-SMAD4    | 0 | 0        | 0        | 0        | 0        | 0        | 0        | 0       | 0        | 0.475963 | 0        | 0        | 0        | 0        | 0 | 0 | 0       | 0        | 0 |
| CTNNB1-PBRM1    | 0 | 0        | 0        | 0        | 0        | 0        | 0.23249  | 0       | 0        | 0        | 0        | 0        | 0        | 0        | 0 | 0 | 0       | 0        | 0 |
| ACTL6A-SMARCC1  | 0 | 0        | 0        | 0        | 0        | 0        | 0.334364 | 0       | 0        | 0        | 0        | 0        | 0        | 0        | 0 | 0 | 0       | 0        | 0 |
| FRAT1-NCOA1     | 0 | 0.360357 | 0        | 0        | 0        | 0        | 0        | 0       | 0        | 0        | 0        | 0        | 0        | 0        | 0 | 0 | 0       | 0        | 0 |
| TCEB2-VHL       | 0 | 0        | 0        | 0.590288 | 0        | 0        | 0        | 0       | 0        | 0        | 0        | 0        | 0        | 0        | 0 | 0 | 0       | 0        | 0 |
| LRP5-SMARCE1    | 0 | 0        | 0        | 0        | 0        | 0        | 0.324701 | 0       | 0        | 0        | 0        | 0        | 0        | 0        | 0 | 0 | 0       | 0        | 0 |
| CCND1-MDM2      | 0 | 0        | 0        | 0        | 0        | 0        | 0        | 0       | 0        | 0        | 0        | 0        | 0.30224  | 0        | 0 | 0 | 0       | 0        | 0 |
| BCL2L1-RPS6KB1  | 0 | 0        | 0        | 0        | 0        | 0        | 0.346367 | 0       | 0        | 0        | 0        | 0        | 0        | 0        | 0 | 0 | 0       | 0        | 0 |
| FGF1-TGFB3      | 0 | 0        | 0        | 0        | 0        | 0        | 0        | 0       | 0        | 0        | 0        | 0        | 0        | 0.247781 | 0 | 0 | 0       | 0        | 0 |
| SMAD3-VEGFA     | 0 | 0        | 0        | 0        | 0        | 0        | 0        | 0       | 0        | 0.20051  | 0        | 0        | 0        | 0        | 0 | 0 | 0       | 0        | 0 |
| AKT3-MTOR       | 0 | 0        | 0        | 0        | 0        | 0        | 0        | 0       | 0        | 0        | 0.285961 | 0        | 0        | 0        | 0 | 0 | 0       | 0        | 0 |
| CAMK2G-MAPK1    | 0 | 0        | 0        | 0        | 0        | 0.268222 | 0        | 0       | 0        | 0        | 0        | 0        | 0        | 0        | 0 | 0 | 0       | 0        | 0 |
| GADD45G-SMARCC1 | 0 | 0        | 0        | 0        | 0        | 0        | 0.277302 | 0       | 0        | 0        | 0        | 0        | 0        | 0        | 0 | 0 | 0       | 0        | 0 |
| PLAT-RELA       | 0 | 0        | 0        | 0        | 0        | 0        | 0        | 0       | 0        | 0        | 0.201102 | 0        | 0        | 0        | 0 | 0 | 0       | 0        | 0 |
| CDK2-MAP2K1     | 0 | 0        | 0        | 0        | 0        | 0        | 0        | 0       | 0        | 0        | 0        | 0        | 0.213671 | 0        | 0 | 0 | 0       | 0        | 0 |
| BIRC5-RPS6KB2   | 0 | 0        | 0.724164 | 0        | 0        | 0        | 0        | 0       | 0        | 0        | 0        | 0        | 0        | 0        | 0 | 0 | 0       | 0        | 0 |
| BIRC5-RPS6KB1   | 0 | 0        | 0.24879  | 0        | 0        | 0        | 0        | 0       | 0        | 0        | 0        | 0        | 0        | 0        | 0 | 0 | 0       | 0        | 0 |
| BRD7-PIK3R1     | 0 | 0        | 0        | 0        | 0        | 0        | 0.290659 | 0       | 0        | 0        | 0        | 0        | 0        | 0        | 0 | 0 | 0       | 0        | 0 |
| BAD-MGST3       | 0 | 0        | 0        | 0        | 0        | 0        | 0.273318 | 0       | 0        | 0        | 0        | 0        | 0        | 0        | 0 | 0 | 0       | 0        | 0 |
| FOXO3-HRAS      | 0 | 0        | 0        | 0        | 0        | 0        | 0        | 0       | 0        | 0        | 0        | 0        | 0        | 0        | 0 | 0 | 0       | 0.271459 | 0 |
| ACTL6A-MAPK1    | 0 | 0        | 0        | 0        | 0        | 0        | 0.30498  | 0       | 0        | 0        | 0        | 0        | 0        | 0        | 0 | 0 | 0       | 0        | 0 |
| FH-TGFB1        | 0 | 0        | 0        | 0        | 0.350115 | 0        | 0        | 0       | 0        | 0        | 0        | 0        | 0        | 0        | 0 | 0 | 0       | 0        | 0 |
| PLAU-TGFA       | 0 | 0        | 0        | 0        | 0        | 0        | 0        | 0       | 0        | 0        | 0        | 0.272548 | 0        | 0        | 0 | 0 | 0       | 0        | 0 |
| FH-TGFB3        | 0 | 0        | 0        | 0.305513 | 0        | 0        | 0        | 0       | 0        | 0        | 0        | 0        | 0        | 0        | 0 | 0 | 0       | 0        | 0 |
| FZD2-MAPK3      | 0 | 0.238674 | 0        | 0        | 0        | 0        | 0        | 0       | 0        | 0        | 0        | 0        | 0        | 0        | 0 | 0 | 0       | 0        | 0 |
| KEAP1-TXNRD1    | 0 | 0        | 0        | 0        | 0        | 0        | 0.225117 | 0       | 0        | 0        | 0        | 0        | 0        | 0        | 0 | 0 | 0       | 0        | 0 |
| ERBB2-PIK3CB    | 0 | 0        | 0        | 0        | 0        | 0        | 0        | 0       | 0        | 0        | 0        | 0.343181 | 0        | 0        | 0 | 0 | 0       | 0        | 0 |
| AKT3-MAPK1      | 0 | 0        | 0        | 0        | 0        | 0        | 0        | 0       | 0        | 0        | 0.35074  | 0        | 0        | 0        | 0 | 0 | 0       | 0        | 0 |
| TCF7L1-TGFB2    | 0 | 0        | 0.249535 | 0        | 0        | 0        | 0        | 0       | 0        | 0        | 0        | 0        | 0        | 0        | 0 | 0 | 0       | 0        | 0 |
| PTEN-TGFA       | 0 | 0        | 0        | 0        | 0        | 0        | 0        | 0       | 0        | 0        | 0        | 0.246823 | 0        | 0        | 0 | 0 | 0       | 0        | 0 |
| AKT3-TCF7L1     | 0 | 0        | 0.735567 | 0        | 0        | 0        | 0        | 0       | 0        | 0        | 0        | 0        | 0        | 0        | 0 | 0 | 0       | 0        | 0 |
| MAP2K1-PRKCB    | 0 | 0        | 0        | 0        | 0        | 0        | 0.409507 | 0       | 0        | 0        | 0        | 0        | 0        | 0        | 0 | 0 | 0       | 0        | 0 |
| PIK3R3-RAC1     | 0 | 0        | 0        | 0        | 0        | 0        | 0        | 0       | 0        | 0        | 0.221016 | 0        | 0        | 0        | 0 | 0 | 0       | 0        | 0 |
| HRAS-PRKCB      | 0 | 0        | 0        | 0        | 0        | 0        | 0        | 0.20701 | 0        | 0        | 0        | 0        | 0        | 0        | 0 | 0 | 0       | 0        | 0 |
| ERG-PIK3CB      | 0 | 0        | 0        | 0        | 0        | 0        | 0        | 0       | 0        | 0        | 0        | 0.253191 | 0        | 0        | 0 | 0 | 0       | 0        | 0 |
| CREBBP-KLK3     | 0 | 0        | 0        | 0        | 0        | 0        | 0        | 0       | 0        | 0        | 0        | 0.257295 | 0        | 0        | 0 | 0 | 0       | 0        | 0 |
| MDM2-MITF       | 0 | 0        | 0        | 0        | 0        | 0        | 0        | 0       | 0        | 0        | 0        | 0        | 0.259925 | 0        | 0 | 0 | 0       | 0        | 0 |
| EGFR-GRB2       | 0 | 0        | 0        | 0        | 0        | 0        | 0        | 0       | 0        | 0        | 0        | 0        | 0        | 0.207032 | 0 | 0 | 0       | 0        | 0 |
| FZD1-MYC        | 0 | 0        | 0        | 0        | 0        | 0        | 0        | 0       | 0        | 0        | 0        | 0        | 0        | 0.22527  | 0 | 0 | 0       | 0        | 0 |
| ARID2-SMARCB1   | 0 | 0        | 0        | 0        | 0        | 0        | 0.246559 | 0       | 0        | 0        | 0        | 0        | 0        | 0        | 0 | 0 | 0       | 0        | 0 |
| NRAS-STAT5B     | 0 | 0        | 0        | 0        | 0        | 0        | 0        | 0       | 0.318542 | 0        | 0        | 0        | 0        | 0        | 0 | 0 | 0       | 0        | 0 |
| PBRM1-PRKCG     | 0 | 0        | 0        | 0        | 0        | 0        | 0.207742 | 0       | 0        | 0        | 0        | 0        | 0        | 0        | 0 | 0 | 0       | 0        | 0 |
| E2F3-RB1        | 0 | 0        | 0        | 0        | 0        | 0        | 0        | 0       | 0.360108 | 0        | 0        | 0        | 0        | 0        | 0 | 0 | 0       | 0        | 0 |
| RAD51-RALB      | 0 | 0        | 0        | 0        | 0        | 0        | 0        | 0       | 0        | 0.379162 | 0        | 0        | 0        | 0        | 0 | 0 | 0       | 0        | 0 |
| CREBBP-PDPK1    | 0 | 0        | 0        | 0        | 0        | 0        | 0        | 0       | 0        | 0        | 0        | 0.523949 | 0        | 0        | 0 | 0 | 0       | 0        | 0 |
| DVL2-SMARCA2    | 0 | 0        | 0        | 0        | 0        | 0        | 0.251972 | 0       | 0        | 0        | 0        | 0        | 0        | 0        | 0 | 0 | 0       | 0        | 0 |
| DVL2-HGF        | 0 | 0        | 0        | 0        | 0        | 0        | 0        | 0       | 0        | 0        | 0        | 0        | 0        | 0.406045 | 0 | 0 | 0       | 0        | 0 |
| WNT2-WNT5A      | 0 | 0        | 0        | 0        | 0        | 0        | 0        | 0       | 0        | 0        | 0        | 0        | 0        | 0.285494 | 0 | 0 | 0       | 0        | 0 |





|                 |          |          |          |          |          |          |          |   |          |          |          |          |          |   |          |         |   |   |   |
|-----------------|----------|----------|----------|----------|----------|----------|----------|---|----------|----------|----------|----------|----------|---|----------|---------|---|---|---|
| AKT3-FGF1       | 0        | 0.239134 | 0        | 0        | 0        | 0        | 0        | 0 | 0        | 0        | 0        | 0        | 0        | 0 | 0        | 0       | 0 | 0 | 0 |
| HRAS-RXRA       | 0        | 0        | 0        | 0        | 0        | 0        | 0        | 0 | 0.269132 | 0        | 0        | 0        | 0        | 0 | 0        | 0       | 0 | 0 | 0 |
| PBRM1-SMARCD2   | 0        | 0        | 0        | 0        | 0        | 0        | 0.230443 | 0 | 0        | 0        | 0        | 0        | 0        | 0 | 0        | 0       | 0 | 0 | 0 |
| PAK1-PIK3R3     | 0        | 0        | 0        | 0        | 0.294022 | 0        | 0        | 0 | 0        | 0        | 0        | 0        | 0        | 0 | 0        | 0       | 0 | 0 | 0 |
| BAK1-RAD51      | 0        | 0        | 0        | 0        | 0        | 0        | 0        | 0 | 0        | 0.359015 | 0        | 0        | 0        | 0 | 0        | 0       | 0 | 0 | 0 |
| CAMK2B-SOS2     | 0        | 0        | 0        | 0        | 0        | 0.30475  | 0        | 0 | 0        | 0        | 0        | 0        | 0        | 0 | 0        | 0       | 0 | 0 | 0 |
| MAPK9-RAC2      | 0        | 0        | 0        | 0        | 0        | 0        | 0        | 0 | 0        | 0.450155 | 0        | 0        | 0        | 0 | 0        | 0       | 0 | 0 | 0 |
| GSK3B-NCOA3     | 0        | 0.569824 | 0        | 0        | 0        | 0        | 0        | 0 | 0        | 0        | 0        | 0        | 0        | 0 | 0        | 0       | 0 | 0 | 0 |
| IGF1-RELA       | 0        | 0        | 0        | 0        | 0        | 0        | 0        | 0 | 0        | 0        | 0.264962 | 0        | 0        | 0 | 0        | 0       | 0 | 0 | 0 |
| AKT3-RPS6KB2    | 0        | 0        | 0.202352 | 0        | 0        | 0        | 0        | 0 | 0        | 0        | 0        | 0        | 0        | 0 | 0        | 0       | 0 | 0 | 0 |
| BAX-RPS6KB1     | 0        | 0.300865 | 0        | 0        | 0        | 0        | 0        | 0 | 0        | 0        | 0        | 0        | 0        | 0 | 0        | 0       | 0 | 0 | 0 |
| AKT3-RPS6KB1    | 0        | 0        | 0        | 0        | 0        | 0        | 0        | 0 | 0        | 0        | 0.244391 | 0        | 0        | 0 | 0        | 0       | 0 | 0 | 0 |
| CREB1-PIK3R1    | 0        | 0        | 0        | 0        | 0        | 0        | 0        | 0 | 0        | 0        | 0.443842 | 0        | 0        | 0 | 0        | 0       | 0 | 0 | 0 |
| BAD-GSTP1       | 0        | 0        | 0        | 0        | 0        | 0        | 0.209916 | 0 | 0        | 0        | 0        | 0        | 0        | 0 | 0        | 0       | 0 | 0 | 0 |
| BRAF-STAT5A     | 0        | 0        | 0        | 0        | 0        | 0        | 0        | 0 | 0.212992 | 0        | 0        | 0        | 0        | 0 | 0        | 0       | 0 | 0 | 0 |
| CTNNA1-RARB     | 0        | 0        | 0        | 0        | 0        | 0        | 0        | 0 | 0        | 0        | 0        | 0        | 0        | 0 | 0.21069  | 0       | 0 | 0 | 0 |
| BBC3-BIRC5      | 0        | 0        | 0.261104 | 0        | 0        | 0        | 0        | 0 | 0        | 0        | 0        | 0        | 0        | 0 | 0        | 0       | 0 | 0 | 0 |
| HEY1-NCOA1      | 0        | 0.22475  | 0        | 0        | 0        | 0        | 0        | 0 | 0        | 0        | 0        | 0        | 0        | 0 | 0        | 0       | 0 | 0 | 0 |
| GRB2-MTOR       | 0        | 0.397881 | 0        | 0        | 0        | 0        | 0        | 0 | 0        | 0        | 0        | 0        | 0        | 0 | 0        | 0       | 0 | 0 | 0 |
| TCF7L2-TGFA     | 0        | 0        | 0.20884  | 0        | 0        | 0        | 0        | 0 | 0        | 0        | 0        | 0        | 0        | 0 | 0        | 0       | 0 | 0 | 0 |
| RALA-RALB       | 0        | 0        | 0        | 0        | 0        | 0        | 0        | 0 | 0        | 0        | 0.415955 | 0        | 0        | 0 | 0        | 0       | 0 | 0 | 0 |
| MAPK10-RALGDS   | 0        | 0        | 0        | 0        | 0        | 0        | 0        | 0 | 0        | 0        | 0.242565 | 0        | 0        | 0 | 0        | 0       | 0 | 0 | 0 |
| GAB1-MGST2      | 0        | 0        | 0        | 0        | 0        | 0        | 0.533976 | 0 | 0        | 0        | 0        | 0        | 0        | 0 | 0        | 0       | 0 | 0 | 0 |
| ARHGFE6-RPS6KB1 | 0        | 0        | 0        | 0        | 0        | 0        | 0        | 0 | 0        | 0        | 0.206206 | 0        | 0        | 0 | 0        | 0       | 0 | 0 | 0 |
| CREB1-MAP2K2    | 0        | 0        | 0        | 0        | 0        | 0        | 0        | 0 | 0        | 0        | 0.797236 | 0        | 0        | 0 | 0        | 0       | 0 | 0 | 0 |
| NRAS-RAC3       | 0        | 0        | 0.255011 | 0        | 0        | 0        | 0        | 0 | 0        | 0        | 0        | 0        | 0        | 0 | 0        | 0       | 0 | 0 | 0 |
| FZD7-TCF7       | 0        | 0.202651 | 0        | 0        | 0        | 0        | 0        | 0 | 0        | 0        | 0        | 0        | 0        | 0 | 0        | 0       | 0 | 0 | 0 |
| CCNE2-CDK2      | 0        | 0        | 0        | 0        | 0        | 0        | 0        | 0 | 0        | 0        | 0        | 1.043133 | 0        | 0 | 0        | 0       | 0 | 0 | 0 |
| BBC3-MAPK1      | 0        | 0        | 0.28264  | 0        | 0        | 0        | 0        | 0 | 0        | 0        | 0        | 0        | 0        | 0 | 0        | 0       | 0 | 0 | 0 |
| FLT4-HEYL       | 0        | 0.486716 | 0        | 0        | 0        | 0        | 0        | 0 | 0        | 0        | 0        | 0        | 0        | 0 | 0        | 0       | 0 | 0 | 0 |
| PIK3R2-TGFA     | 0        | 0        | 0        | 0        | 0        | 0        | 0        | 0 | 0        | 0        | 0.206988 | 0        | 0        | 0 | 0        | 0       | 0 | 0 | 0 |
| BAX-GSK3B       | 0        | 0.215924 | 0        | 0        | 0        | 0        | 0        | 0 | 0        | 0        | 0        | 0        | 0        | 0 | 0        | 0       | 0 | 0 | 0 |
| PIK3CA-TCEB2    | 0        | 0        | 0        | 0        | 0        | 0.318066 | 0        | 0 | 0        | 0        | 0        | 0        | 0        | 0 | 0        | 0       | 0 | 0 | 0 |
| DDB2-MAPK8      | 0        | 0        | 0        | 0        | 0        | 0        | 0        | 0 | 0        | 0        | 0.280777 | 0        | 0        | 0 | 0        | 0       | 0 | 0 | 0 |
| MMP2-THBS1      | 0.444402 | 0        | 0        | 0        | 0        | 0        | 0        | 0 | 0        | 0        | 0        | 0        | 0        | 0 | 0        | 0       | 0 | 0 | 0 |
| BAX-GADD45B     | 0        | 0.372324 | 0        | 0        | 0        | 0        | 0        | 0 | 0        | 0        | 0        | 0        | 0        | 0 | 0        | 0       | 0 | 0 | 0 |
| DDB2-MAPK3      | 0        | 0.265816 | 0        | 0        | 0        | 0        | 0        | 0 | 0        | 0        | 0        | 0        | 0        | 0 | 0        | 0       | 0 | 0 | 0 |
| BAX-GADD45G     | 0        | 0        | 0        | 0        | 0        | 0        | 0        | 0 | 0        | 0.23071  | 0        | 0        | 0        | 0 | 0        | 0       | 0 | 0 | 0 |
| MAPK3-PRKCB     | 0        | 0        | 0        | 0        | 0        | 0.373451 | 0        | 0 | 0        | 0        | 0        | 0        | 0        | 0 | 0        | 0       | 0 | 0 | 0 |
| CCND1-EGFR      | 0        | 0        | 0        | 0        | 0        | 0        | 0        | 0 | 0        | 0        | 0.249349 | 0        | 0        | 0 | 0        | 0       | 0 | 0 | 0 |
| POLK-TP53       | 0        | 0        | 0        | 0        | 0        | 0        | 0        | 0 | 0        | 0        | 0.23404  | 0        | 0        | 0 | 0        | 0       | 0 | 0 | 0 |
| MET-PDGFB       | 0        | 0        | 0        | 0.274227 | 0        | 0        | 0        | 0 | 0        | 0        | 0        | 0        | 0        | 0 | 0        | 0       | 0 | 0 | 0 |
| AR-CREB3L1      | 0        | 0        | 0        | 0        | 0        | 0        | 0        | 0 | 0        | 0        | 0        | 0.219272 | 0        | 0 | 0        | 0       | 0 | 0 | 0 |
| AR-CREB3L2      | 0        | 0        | 0        | 0        | 0        | 0        | 0        | 0 | 0        | 0        | 0        | 0.343797 | 0        | 0 | 0        | 0       | 0 | 0 | 0 |
| TCF7-TGFB2      | 0        | 0        | 0        | 0        | 0        | 0        | 0        | 0 | 0        | 0        | 0        | 0        | 0.226657 | 0 | 0        | 0       | 0 | 0 | 0 |
| HMOX1-SMARCA4   | 0        | 0        | 0        | 0        | 0        | 0        | 0.209183 | 0 | 0        | 0        | 0        | 0        | 0        | 0 | 0        | 0       | 0 | 0 | 0 |
| FZD1-GSK3B      | 0        | 0        | 0        | 0        | 0        | 0        | 0        | 0 | 0        | 0        | 0        | 0        | 0        | 0 | 0.386299 | 0       | 0 | 0 | 0 |
| BIRC5-RALGDS    | 0        | 0        | 0.2179   | 0        | 0        | 0        | 0        | 0 | 0        | 0        | 0        | 0        | 0        | 0 | 0        | 0       | 0 | 0 | 0 |
| CALM3-PRKCB     | 0        | 0        | 0        | 0        | 0        | 0.341624 | 0        | 0 | 0        | 0        | 0        | 0        | 0        | 0 | 0        | 0       | 0 | 0 | 0 |
| DVL1-E2F1       | 0        | 0        | 0        | 0        | 0        | 0        | 0.302443 | 0 | 0        | 0        | 0        | 0        | 0        | 0 | 0        | 0       | 0 | 0 | 0 |
| CALM3-PRKCG     | 0        | 0        | 0        | 0        | 0        | 0.409767 | 0        | 0 | 0        | 0        | 0        | 0        | 0        | 0 | 0        | 0       | 0 | 0 | 0 |
| PIK3CD-RALGDS   | 0        | 0        | 0.389063 | 0        | 0        | 0        | 0        | 0 | 0        | 0        | 0        | 0        | 0        | 0 | 0        | 0       | 0 | 0 | 0 |
| SOS1-TXNRD2     | 0        | 0        | 0        | 0        | 0        | 0        | 0.294875 | 0 | 0        | 0        | 0        | 0        | 0        | 0 | 0        | 0       | 0 | 0 | 0 |
| BAD-SMARCC1     | 0        | 0        | 0        | 0        | 0        | 0        | 0.612528 | 0 | 0        | 0        | 0        | 0        | 0        | 0 | 0        | 0       | 0 | 0 | 0 |
| PDGFD-PIK3CB    | 0        | 0        | 0        | 0        | 0        | 0        | 0        | 0 | 0        | 0        | 0        | 0        | 0.299912 | 0 | 0        | 0       | 0 | 0 | 0 |
| CREB1-IKBK      | 0        | 0        | 0        | 0        | 0        | 0        | 0        | 0 | 0        | 0        | 0        | 0.320316 | 0        | 0 | 0        | 0       | 0 | 0 | 0 |
| ARNT-NRAS       | 0        | 0        | 0        | 0        | 0.23606  | 0        | 0        | 0 | 0        | 0        | 0        | 0        | 0        | 0 | 0        | 0       | 0 | 0 | 0 |
| DDB2-RAF1       | 0        | 0        | 0        | 0        | 0        | 0.226744 | 0        | 0 | 0        | 0        | 0        | 0        | 0        | 0 | 0        | 0       | 0 | 0 | 0 |
| GADD45B-TGFB1   | 0        | 0        | 0        | 0        | 0        | 0        | 0        | 0 | 0        | 0        | 0.209251 | 0        | 0        | 0 | 0        | 0       | 0 | 0 | 0 |
| ARID1A-MGST2    | 0        | 0        | 0        | 0        | 0        | 0        | 0.321386 | 0 | 0        | 0        | 0        | 0        | 0        | 0 | 0        | 0       | 0 | 0 | 0 |
| BAX-E2F3        | 0        | 0        | 0        | 0        | 0        | 0        | 0        | 0 | 0        | 0        | 0        | 0        | 0.227405 | 0 | 0        | 0       | 0 | 0 | 0 |
| CSNK1A1-FGF21   | 0        | 0        | 0        | 0        | 0        | 0        | 0        | 0 | 0        | 0        | 0        | 0        | 0        | 0 | 0.309823 | 0       | 0 | 0 | 0 |
| PDGFRB-TCF7L1   | 0        | 0        | 0        | 0        | 0        | 0        | 0        | 0 | 0        | 0        | 0        | 0.324064 | 0        | 0 | 0        | 0       | 0 | 0 | 0 |
| CREB3L1-EP300   | 0        | 0        | 0        | 0        | 0        | 0        | 0        | 0 | 0        | 0        | 0        | 0.229273 | 0        | 0 | 0        | 0       | 0 | 0 | 0 |
| NCOA3-TCF7      | 0        | 0.21067  | 0        | 0        | 0        | 0        | 0        | 0 | 0        | 0        | 0        | 0        | 0        | 0 | 0        | 0       | 0 | 0 | 0 |
| CDK6-TCF7L1     | 0        | 0        | 0        | 0        | 0        | 0        | 0.247879 | 0 | 0        | 0        | 0        | 0        | 0        | 0 | 0        | 0       | 0 | 0 | 0 |
| AKT3-PTEN       | 0        | 0        | 0        | 0        | 0        | 0        | 0        | 0 | 0        | 0        | 0        | 0.262348 | 0        | 0 | 0        | 0       | 0 | 0 | 0 |
| PIK3CA-PRCC     | 0        | 0        | 0        | 0        | 0.280851 | 0        | 0        | 0 | 0        | 0        | 0        | 0        | 0        | 0 | 0        | 0       | 0 | 0 | 0 |
| LRP5-PIK3R2     | 0        | 0        | 0        | 0        | 0        | 0        | 0.392542 | 0 | 0        | 0        | 0        | 0        | 0        | 0 | 0        | 0       | 0 | 0 | 0 |
| GADD45G-SHC2    | 0        | 0        | 0        | 0        | 0        | 0.300428 | 0        | 0 | 0        | 0        | 0        | 0        | 0        | 0 | 0        | 0       | 0 | 0 | 0 |
| LRP6-PIK3R1     | 0        | 0        | 0        | 0        | 0        | 0        | 0.21539  | 0 | 0        | 0        | 0        | 0        | 0        | 0 | 0        | 0       | 0 | 0 | 0 |
| EGFR-TGFA       | 0        | 0        | 0        | 0        | 0        | 0        | 0        | 0 | 0        | 0        | 0.252395 | 0        | 0        | 0 | 0        | 0       | 0 | 0 | 0 |
| HIF1A-TGFB3     | 0        | 0        | 0        | 0.209363 | 0        | 0        | 0        | 0 | 0        | 0        | 0        | 0        | 0        | 0 | 0        | 0       | 0 | 0 | 0 |
| CREBBP-FH       | 0        | 0        | 0        | 0        | 0.272612 | 0        | 0        | 0 | 0        | 0        | 0        | 0        | 0        | 0 | 0        | 0       | 0 | 0 | 0 |
| AXIN2-CSNK1A1   | 0        | 0        | 0        | 0        | 0        | 0        | 0.223603 | 0 | 0        | 0        | 0        | 0        | 0        | 0 | 0        | 0       | 0 | 0 | 0 |
| CDKN1B-PIK3R2   | 0        | 0        | 0        | 0        | 0        | 0        | 0        | 0 | 0        | 0        | 0        | 0        | 0        | 0 | 0.268132 | 0       | 0 | 0 | 0 |
| RXRG-TCF7L2     | 0        | 0        | 0        | 0        | 0        | 0        | 0        | 0 | 0        | 0        | 0        | 0        | 0        | 0 | 0        | 0.25698 | 0 | 0 | 0 |



|                |         |          |          |          |          |          |          |          |   |          |          |          |          |          |   |   |   |   |
|----------------|---------|----------|----------|----------|----------|----------|----------|----------|---|----------|----------|----------|----------|----------|---|---|---|---|
| BRAF-RAPGEF1   | 0       | 0        | 0        | 0        | 0.352145 | 0        | 0        | 0        | 0 | 0        | 0        | 0        | 0        | 0        | 0 | 0 | 0 | 0 |
| EGLN2-TCEB2    | 0       | 0        | 0        | 0.332285 | 0        | 0        | 0        | 0        | 0 | 0        | 0        | 0        | 0        | 0        | 0 | 0 | 0 | 0 |
| AKT3-CREB3L2   | 0       | 0        | 0        | 0        | 0        | 0        | 0        | 0        | 0 | 0        | 0.32511  | 0        | 0        | 0        | 0 | 0 | 0 | 0 |
| MSH2-SOS1      | 0       | 0        | 0.412533 | 0        | 0        | 0        | 0        | 0        | 0 | 0        | 0        | 0        | 0        | 0        | 0 | 0 | 0 | 0 |
| SHC4-TGFB2     | 0       | 0        | 0        | 0        | 0        | 0        | 0        | 0        | 0 | 0        | 0        | 0        | 0        | 0.24041  | 0 | 0 | 0 | 0 |
| SLC2A1-TGFA    | 0       | 0        | 0        | 0.261288 | 0        | 0        | 0        | 0        | 0 | 0        | 0        | 0        | 0        | 0        | 0 | 0 | 0 | 0 |
| AXIN1-BRAF     | 0       | 0        | 0        | 0        | 0        | 0        | 0.223105 | 0        | 0 | 0        | 0        | 0        | 0        | 0        | 0 | 0 | 0 | 0 |
| HRAS-RB1       | 0       | 0        | 0        | 0        | 0        | 0.839492 | 0        | 0        | 0 | 0        | 0        | 0        | 0        | 0        | 0 | 0 | 0 | 0 |
| CDK4-HRAS      | 0       | 0.207384 | 0        | 0        | 0        | 0        | 0        | 0        | 0 | 0        | 0        | 0        | 0        | 0        | 0 | 0 | 0 | 0 |
| GAB1-LRP6      | 0       | 0        | 0        | 0        | 0        | 0        | 0.278245 | 0        | 0 | 0        | 0        | 0        | 0        | 0        | 0 | 0 | 0 | 0 |
| HGF-HRAS       | 0       | 0        | 0        | 0        | 0.245928 | 0        | 0        | 0        | 0 | 0        | 0        | 0        | 0        | 0        | 0 | 0 | 0 | 0 |
| AKT1-MAPK10    | 0       | 0        | 0        | 0        | 0        | 0        | 0        | 0        | 0 | 0.237153 | 0        | 0        | 0        | 0        | 0 | 0 | 0 | 0 |
| AKT3-PIK3R1    | 0       | 0        | 0        | 0        | 0        | 0.530357 | 0        | 0        | 0 | 0        | 0        | 0        | 0        | 0        | 0 | 0 | 0 | 0 |
| CRK-EPAS1      | 0       | 0        | 0        | 0.258903 | 0        | 0        | 0        | 0        | 0 | 0        | 0        | 0        | 0        | 0        | 0 | 0 | 0 | 0 |
| PIK3R3-SLC2A1  | 0       | 0        | 0        | 0.204703 | 0        | 0        | 0        | 0        | 0 | 0        | 0        | 0        | 0        | 0        | 0 | 0 | 0 | 0 |
| MAP2K2-NFKB1   | 0       | 0        | 0        | 0        | 0        | 0        | 0        | 0        | 0 | 0        | 0.301747 | 0        | 0        | 0        | 0 | 0 | 0 | 0 |
| E2F2-EML4      | 0       | 0        | 0        | 0        | 0        | 0        | 0.320788 | 0        | 0 | 0        | 0        | 0        | 0        | 0        | 0 | 0 | 0 | 0 |
| MAP2K1-PDGFD   | 0       | 0        | 0        | 0        | 0        | 0        | 0        | 0        | 0 | 0        | 0.220536 | 0        | 0        | 0        | 0 | 0 | 0 | 0 |
| MAP2K2-NFKB2   | 0       | 0.290346 | 0        | 0        | 0        | 0        | 0        | 0        | 0 | 0        | 0        | 0        | 0        | 0        | 0 | 0 | 0 | 0 |
| CREB1-GSK3B    | 0       | 0        | 0        | 0        | 0        | 0        | 0        | 0        | 0 | 0        | 0.379667 | 0        | 0        | 0        | 0 | 0 | 0 | 0 |
| CCND1-RAC1     | 0       | 0        | 0.326014 | 0        | 0        | 0        | 0        | 0        | 0 | 0        | 0        | 0        | 0        | 0        | 0 | 0 | 0 | 0 |
| PLCG1-SOS1     | 0       | 0        | 0        | 0        | 0        | 0        | 0        | 0.377828 | 0 | 0        | 0        | 0        | 0        | 0        | 0 | 0 | 0 | 0 |
| ARAF-RAF1      | 0       | 0        | 0        | 0        | 0        | 0        | 0.399531 | 0        | 0 | 0        | 0        | 0        | 0        | 0        | 0 | 0 | 0 | 0 |
| CTNNA1-SMAD3   | 0       | 0        | 0.399948 | 0        | 0        | 0        | 0        | 0        | 0 | 0        | 0        | 0        | 0        | 0        | 0 | 0 | 0 | 0 |
| DVL1-RXRA      | 0       | 0        | 0        | 0        | 0        | 0        | 0        | 0        | 0 | 0        | 0        | 0        | 0        | 0.225622 | 0 | 0 | 0 | 0 |
| RB1-SHC2       | 0       | 0        | 0        | 0        | 0        | 0.369817 | 0        | 0        | 0 | 0        | 0        | 0        | 0        | 0        | 0 | 0 | 0 | 0 |
| PIK3CA-RAC1    | 0       | 0        | 0        | 0.475402 | 0        | 0        | 0        | 0        | 0 | 0        | 0        | 0        | 0        | 0        | 0 | 0 | 0 | 0 |
| CREBBP-RAPGEF1 | 0       | 0        | 0        | 0.319265 | 0        | 0        | 0        | 0        | 0 | 0        | 0        | 0        | 0        | 0        | 0 | 0 | 0 | 0 |
| ACTB-SMAD3     | 0       | 0        | 0        | 0        | 0        | 0        | 0.321308 | 0        | 0 | 0        | 0        | 0        | 0        | 0        | 0 | 0 | 0 | 0 |
| SHC1-TGFB2     | 0       | 0        | 0        | 0        | 0        | 0        | 0        | 0        | 0 | 0        | 0        | 0        | 0.20966  | 0        | 0 | 0 | 0 | 0 |
| ACTL6B-WNT8A   | 0       | 0        | 0        | 0        | 0        | 0        | 1.118169 | 0        | 0 | 0        | 0        | 0        | 0        | 0        | 0 | 0 | 0 | 0 |
| FZD3-MAPK3     | 0       | 0        | 0        | 0        | 0        | 0        | 0        | 0        | 0 | 0        | 0        | 0        | 0.212803 | 0        | 0 | 0 | 0 | 0 |
| CCNE2-GSK3B    | 0       | 0        | 0        | 0        | 0        | 0        | 0        | 0        | 0 | 0        | 0.295818 | 0        | 0        | 0        | 0 | 0 | 0 | 0 |
| APC-BRCA2      | 0       | 0.354548 | 0        | 0        | 0        | 0        | 0        | 0        | 0 | 0        | 0        | 0        | 0        | 0        | 0 | 0 | 0 | 0 |
| GADD45G-RXRA   | 0       | 0        | 0        | 0        | 0        | 0        | 0        | 0.22202  | 0 | 0        | 0        | 0        | 0        | 0        | 0 | 0 | 0 | 0 |
| AKT1-JUN       | 0       | 0.214328 | 0        | 0        | 0        | 0        | 0        | 0        | 0 | 0        | 0        | 0        | 0        | 0        | 0 | 0 | 0 | 0 |
| JUN-RALGDS     | 0       | 0        | 0.297192 | 0        | 0        | 0        | 0        | 0        | 0 | 0        | 0        | 0        | 0        | 0        | 0 | 0 | 0 | 0 |
| BAK1-FOXO3     | 0       | 0        | 0        | 0        | 0        | 0        | 0        | 0.33209  | 0 | 0        | 0        | 0        | 0        | 0        | 0 | 0 | 0 | 0 |
| AKT1-ERG       | 0       | 0        | 0        | 0        | 0        | 0        | 0        | 0        | 0 | 0.256778 | 0        | 0        | 0        | 0        | 0 | 0 | 0 | 0 |
| CDC42-ETS1     | 0       | 0        | 0        | 0.233406 | 0        | 0        | 0        | 0        | 0 | 0        | 0        | 0        | 0        | 0        | 0 | 0 | 0 | 0 |
| ARID1A-HRAS    | 0       | 0        | 0        | 0        | 0        | 0.508603 | 0        | 0        | 0 | 0        | 0        | 0        | 0        | 0        | 0 | 0 | 0 | 0 |
| FGF10-PDGFRB   | 0       | 0        | 0        | 0        | 0        | 0        | 0        | 0        | 0 | 0        | 0.273401 | 0        | 0        | 0        | 0 | 0 | 0 | 0 |
| GSK3B-NOTCH3   | 0       | 0.223377 | 0        | 0        | 0        | 0        | 0        | 0        | 0 | 0        | 0        | 0        | 0        | 0        | 0 | 0 | 0 | 0 |
| CDKN1B-HRAS    | 0       | 0        | 0        | 0        | 0        | 0        | 0        | 0        | 0 | 0        | 0.316209 | 0        | 0        | 0        | 0 | 0 | 0 | 0 |
| HMOX1-LRP6     | 0       | 0        | 0        | 0        | 0        | 0        | 0.215793 | 0        | 0 | 0        | 0        | 0        | 0        | 0        | 0 | 0 | 0 | 0 |
| CREBBP-IGF1R   | 0       | 0        | 0        | 0        | 0        | 0        | 0        | 0        | 0 | 0        | 0.22972  | 0        | 0        | 0        | 0 | 0 | 0 | 0 |
| ERBB2-SMAD3    | 0       | 0        | 0        | 0        | 0        | 0        | 0        | 0        | 0 | 0.365334 | 0        | 0        | 0        | 0        | 0 | 0 | 0 | 0 |
| FHIT-PIK3CA    | 0       | 0        | 0        | 0        | 0        | 0        | 0        | 0.32368  | 0 | 0        | 0        | 0        | 0        | 0        | 0 | 0 | 0 | 0 |
| CAMK2B-CAMK2G  | 0       | 0        | 0        | 0        | 0        | 0.225519 | 0        | 0        | 0 | 0        | 0        | 0        | 0        | 0        | 0 | 0 | 0 | 0 |
| CAMK2B-CAMK2D  | 0       | 0        | 0        | 0        | 0        | 0.244396 | 0        | 0        | 0 | 0        | 0        | 0        | 0        | 0        | 0 | 0 | 0 | 0 |
| MAPK8-MTOR     | 0       | 0        | 0        | 0        | 0        | 0        | 0        | 0        | 0 | 0.256992 | 0        | 0        | 0        | 0        | 0 | 0 | 0 | 0 |
| ARID1A-ARID1B  | 0       | 0        | 0        | 0        | 0        | 0        | 0.739546 | 0        | 0 | 0        | 0        | 0        | 0        | 0        | 0 | 0 | 0 | 0 |
| ETS1-TGFB3     | 0       | 0        | 0        | 0.340264 | 0        | 0        | 0        | 0        | 0 | 0        | 0        | 0        | 0        | 0        | 0 | 0 | 0 | 0 |
| FGF2-FGF7      | 0       | 0        | 0        | 0        | 0        | 0        | 0        | 0        | 0 | 0        | 0        | 0        | 0.501714 | 0        | 0 | 0 | 0 | 0 |
| DVL1-NFKB2     | 0       | 0.378488 | 0        | 0        | 0        | 0        | 0        | 0        | 0 | 0        | 0        | 0        | 0        | 0        | 0 | 0 | 0 | 0 |
| PIK3R3-TFE3    | 0       | 0        | 0        | 0.211934 | 0        | 0        | 0        | 0        | 0 | 0        | 0        | 0        | 0        | 0        | 0 | 0 | 0 | 0 |
| FLCN-RAC1      | 0       | 0        | 0        | 0.449524 | 0        | 0        | 0        | 0        | 0 | 0        | 0        | 0        | 0        | 0        | 0 | 0 | 0 | 0 |
| NCOA1-SP1      | 0       | 0.524129 | 0        | 0        | 0        | 0        | 0        | 0        | 0 | 0        | 0        | 0        | 0        | 0        | 0 | 0 | 0 | 0 |
| MAPK3-PAK4     | 0       | 0        | 0        | 0.214814 | 0        | 0        | 0        | 0        | 0 | 0        | 0        | 0        | 0        | 0        | 0 | 0 | 0 | 0 |
| MAPK1-RPS6KB2  | 0       | 0.247096 | 0        | 0        | 0        | 0        | 0        | 0        | 0 | 0        | 0        | 0        | 0        | 0        | 0 | 0 | 0 | 0 |
| NFKB1-PIK3R1   | 0       | 0        | 0        | 0        | 0        | 0        | 0        | 0        | 0 | 0.256577 | 0        | 0        | 0        | 0        | 0 | 0 | 0 | 0 |
| HBEGF-MYC      | 0.22964 | 0        | 0        | 0        | 0        | 0        | 0        | 0        | 0 | 0        | 0        | 0        | 0        | 0        | 0 | 0 | 0 | 0 |
| FZD2-MAP2K2    | 0       | 0.226238 | 0        | 0        | 0        | 0        | 0        | 0        | 0 | 0        | 0        | 0        | 0        | 0        | 0 | 0 | 0 | 0 |
| APC-PBRM1      | 0       | 0        | 0        | 0        | 0        | 0.310992 | 0        | 0        | 0 | 0        | 0        | 0        | 0        | 0        | 0 | 0 | 0 | 0 |
| STAT5A-STK4    | 0       | 0        | 0        | 0        | 0        | 0        | 0.324841 | 0        | 0 | 0        | 0        | 0        | 0        | 0        | 0 | 0 | 0 | 0 |
| AR-EP300       | 0       | 0        | 0        | 0        | 0        | 0        | 0        | 0        | 0 | 0        | 1.096875 | 0        | 0        | 0        | 0 | 0 | 0 | 0 |
| LRP6-MAPK3     | 0       | 0        | 0        | 0        | 0        | 0        | 0        | 0        | 0 | 0        | 0        | 0.33373  | 0        | 0        | 0 | 0 | 0 | 0 |
| LRP6-MAPK1     | 0       | 0        | 0        | 0        | 0        | 0.304579 | 0        | 0        | 0 | 0        | 0        | 0        | 0        | 0        | 0 | 0 | 0 | 0 |
| ARID2-SMARCD1  | 0       | 0        | 0        | 0        | 0        | 0.649996 | 0        | 0        | 0 | 0        | 0        | 0        | 0        | 0        | 0 | 0 | 0 | 0 |
| PDGFC-SRD5A2   | 0       | 0        | 0        | 0        | 0        | 0        | 0        | 0        | 0 | 0        | 0.349951 | 0        | 0        | 0        | 0 | 0 | 0 | 0 |
| ACTG1-MTOR     | 0       | 0        | 0        | 0        | 0        | 0        | 0.24358  | 0        | 0 | 0        | 0        | 0        | 0        | 0        | 0 | 0 | 0 | 0 |
| ARAF-MAP2K2    | 0       | 0.432486 | 0        | 0        | 0        | 0        | 0        | 0        | 0 | 0        | 0        | 0        | 0        | 0        | 0 | 0 | 0 | 0 |
| CDK2-TCF7L2    | 0       | 0        | 0        | 0        | 0        | 0        | 0        | 0        | 0 | 0        | 0.296496 | 0        | 0        | 0        | 0 | 0 | 0 | 0 |
| CREB3L2-EP300  | 0       | 0        | 0        | 0        | 0        | 0        | 0        | 0        | 0 | 0        | 0.336008 | 0        | 0        | 0        | 0 | 0 | 0 | 0 |
| APC-CTNNA1     | 0       | 0        | 0        | 0        | 0        | 0        | 0        | 0        | 0 | 0        | 0        | 0.690492 | 0        | 0        | 0 | 0 | 0 | 0 |
| EGFR-GSK3B     | 0       | 0        | 0        | 0        | 0        | 0        | 0        | 0        | 0 | 0        | 0.327957 | 0        | 0        | 0        | 0 | 0 | 0 | 0 |
| CREB5-PLAU     | 0       | 0        | 0        | 0        | 0        | 0        | 0        | 0        | 0 | 0        | 0.30981  | 0        | 0        | 0        | 0 | 0 | 0 | 0 |



|                |   |          |          |          |          |          |          |          |          |          |          |          |          |          |          |   |          |   |
|----------------|---|----------|----------|----------|----------|----------|----------|----------|----------|----------|----------|----------|----------|----------|----------|---|----------|---|
| BAK1-STAT5A    | 0 | 0        | 0        | 0        | 0        | 0        | 0        | 0        | 0.364387 | 0        | 0        | 0        | 0        | 0        | 0        | 0 | 0        | 0 |
| FGF1-NOTCH1    | 0 | 0.217739 | 0        | 0        | 0        | 0        | 0        | 0        | 0        | 0        | 0        | 0        | 0        | 0        | 0        | 0 | 0        | 0 |
| CREB1-RB1      | 0 | 0        | 0        | 0        | 0        | 0        | 0        | 0        | 0        | 0        | 0        | 1.045382 | 0        | 0        | 0        | 0 | 0        | 0 |
| ARID1A-DVL1    | 0 | 0        | 0        | 0        | 0        | 0        | 0        | 0.579817 | 0        | 0        | 0        | 0        | 0        | 0        | 0        | 0 | 0        | 0 |
| ARID1A-DVL2    | 0 | 0        | 0        | 0        | 0        | 0        | 0        | 0.540238 | 0        | 0        | 0        | 0        | 0        | 0        | 0        | 0 | 0        | 0 |
| AXIN2-PMAIP1   | 0 | 0        | 0.267556 | 0        | 0        | 0        | 0        | 0        | 0        | 0        | 0        | 0        | 0        | 0        | 0        | 0 | 0        | 0 |
| APC-DVL1       | 0 | 0.560331 | 0        | 0        | 0        | 0        | 0        | 0        | 0        | 0        | 0        | 0        | 0        | 0        | 0        | 0 | 0        | 0 |
| CAMK2B-RAF1    | 0 | 0        | 0        | 0        | 0        | 0        | 0.404087 | 0        | 0        | 0        | 0        | 0        | 0        | 0        | 0        | 0 | 0        | 0 |
| PAX8-RXRA      | 0 | 0        | 0        | 0        | 0        | 0        | 0        | 0        | 0        | 0        | 0        | 0        | 0        | 0        | 0        | 0 | 0.304146 | 0 |
| SMAD2-TGFBR2   | 0 | 0        | 0        | 0        | 0        | 0        | 0        | 0        | 0        | 0        | 0        | 0        | 0        | 0        | 0.232862 | 0 | 0        | 0 |
| BRAF-EML4      | 0 | 0        | 0        | 0        | 0        | 0        | 0        | 0        | 0.487741 | 0        | 0        | 0        | 0        | 0        | 0        | 0 | 0        | 0 |
| PRKCG-WNT8A    | 0 | 0        | 0        | 0        | 0        | 0        | 0        | 0.540187 | 0        | 0        | 0        | 0        | 0        | 0        | 0        | 0 | 0        | 0 |
| GSTP1-TCF7L1   | 0 | 0        | 0        | 0        | 0        | 0        | 0        | 0        | 0        | 0        | 0        | 1.308914 | 0        | 0        | 0        | 0 | 0        | 0 |
| AR-GSK3B       | 0 | 0        | 0        | 0        | 0        | 0        | 0        | 0        | 0        | 0        | 0        | 0.320248 | 0        | 0        | 0        | 0 | 0        | 0 |
| BAD-NRAS       | 0 | 0        | 0        | 0        | 0        | 0        | 0        | 0        | 0        | 0        | 0        | 0        | 0.200559 | 0        | 0        | 0 | 0        | 0 |
| CTNNA1-KRAS    | 0 | 0        | 0        | 0        | 0        | 0        | 0        | 0        | 0        | 0        | 0        | 0        | 0        | 0        | 0        | 0 | 0.216309 | 0 |
| FRAT1-FZD4     | 0 | 0.264962 | 0        | 0        | 0        | 0        | 0        | 0        | 0        | 0        | 0        | 0        | 0        | 0        | 0        | 0 | 0        | 0 |
| AKT3-DVL1      | 0 | 0        | 0        | 0        | 0        | 0        | 0        | 0.220608 | 0        | 0        | 0        | 0        | 0        | 0        | 0        | 0 | 0        | 0 |
| FRAT2-MLH1     | 0 | 0        | 0        | 0        | 0        | 0        | 0        | 0        | 0        | 0        | 0        | 0        | 0        | 0.240522 | 0        | 0 | 0        | 0 |
| PIK3R3-RAP1A   | 0 | 0        | 0        | 0        | 0.278421 | 0        | 0        | 0        | 0        | 0        | 0        | 0        | 0        | 0        | 0        | 0 | 0        | 0 |
| FGF20-PDGFC    | 0 | 0        | 0        | 0        | 0        | 0        | 0        | 0        | 0        | 0        | 0        | 0        | 0.230478 | 0        | 0        | 0 | 0        | 0 |
| PRCC-SOS2      | 0 | 0        | 0        | 0.399399 | 0        | 0        | 0        | 0        | 0        | 0        | 0        | 0        | 0        | 0        | 0        | 0 | 0        | 0 |
| BRD7-MAP2K1    | 0 | 0        | 0        | 0        | 0        | 0        | 0.429272 | 0        | 0        | 0        | 0        | 0        | 0        | 0        | 0        | 0 | 0        | 0 |
| MAP2K1-RXR8    | 0 | 0        | 0        | 0        | 0        | 0        | 0        | 0        | 0.396142 | 0        | 0        | 0        | 0        | 0        | 0        | 0 | 0        | 0 |
| PDGFA-PTEN     | 0 | 0        | 0        | 0        | 0        | 0.412242 | 0        | 0        | 0        | 0        | 0        | 0        | 0        | 0        | 0        | 0 | 0        | 0 |
| MAP2K1-MAPK10  | 0 | 0        | 0.356254 | 0        | 0        | 0        | 0        | 0        | 0        | 0        | 0        | 0        | 0        | 0        | 0        | 0 | 0        | 0 |
| ARID1A-PBRM1   | 0 | 0        | 0        | 0        | 0        | 0        | 0.322346 | 0        | 0        | 0        | 0        | 0        | 0        | 0        | 0        | 0 | 0        | 0 |
| GSTO1-GSTO2    | 0 | 0        | 0        | 0        | 0        | 0        | 0.222454 | 0        | 0        | 0        | 0        | 0        | 0        | 0        | 0        | 0 | 0        | 0 |
| SMAD4-TGFA     | 0 | 0        | 0        | 0        | 0        | 0        | 0        | 0        | 0        | 0.26761  | 0        | 0        | 0        | 0        | 0        | 0 | 0        | 0 |
| FGF22-MAP2K1   | 0 | 0        | 0        | 0        | 0        | 0        | 0        | 0        | 0        | 0        | 0        | 0        | 0        | 0.201052 | 0        | 0 | 0        | 0 |
| E2F2-MITF      | 0 | 0        | 0        | 0        | 0        | 0        | 0        | 0        | 0        | 0        | 0        | 0.697003 | 0        | 0        | 0        | 0 | 0        | 0 |
| IGF1R-PDGFRB   | 0 | 0        | 0        | 0        | 0        | 0        | 0        | 0        | 0        | 0        | 0        | 0        | 0.219673 | 0        | 0        | 0 | 0        | 0 |
| AKT2-CDK2      | 0 | 0        | 0        | 0        | 0        | 0        | 0        | 0        | 0        | 0        | 0        | 0        | 0        | 0.261009 | 0        | 0 | 0        | 0 |
| CSNK1A1-NOTCH1 | 0 | 0.361765 | 0        | 0        | 0        | 0        | 0        | 0        | 0        | 0        | 0        | 0        | 0        | 0        | 0        | 0 | 0        | 0 |
| CDKN1A-MTOR    | 0 | 0        | 0        | 0        | 0        | 0.619736 | 0        | 0        | 0        | 0        | 0        | 0        | 0        | 0        | 0        | 0 | 0        | 0 |
| FRAT1-GSTO1    | 0 | 0        | 0        | 0        | 0        | 0        | 0.358494 | 0        | 0        | 0        | 0        | 0        | 0        | 0        | 0        | 0 | 0        | 0 |
| HRAS-SRD5A2    | 0 | 0        | 0        | 0        | 0        | 0        | 0        | 0        | 0        | 0        | 0        | 0.227632 | 0        | 0        | 0        | 0 | 0        | 0 |
| EGLN1-PAK3     | 0 | 0        | 0        | 0.20256  | 0        | 0        | 0        | 0        | 0        | 0        | 0        | 0        | 0        | 0        | 0        | 0 | 0        | 0 |
| E2F2-GRB2      | 0 | 0        | 0        | 0        | 0        | 0        | 0        | 0.261575 | 0        | 0        | 0        | 0        | 0        | 0        | 0        | 0 | 0        | 0 |
| FOXO3-STK4     | 0 | 0        | 0        | 0        | 0        | 0        | 0        | 0.284358 | 0        | 0        | 0        | 0        | 0        | 0        | 0        | 0 | 0        | 0 |
| PDGFRB-TCF7    | 0 | 0        | 0        | 0        | 0        | 0        | 0        | 0        | 0        | 0        | 0.251871 | 0        | 0        | 0        | 0        | 0 | 0        | 0 |
| HMOX1-PIK3CD   | 0 | 0        | 0        | 0        | 0        | 0.337298 | 0        | 0        | 0        | 0        | 0        | 0        | 0        | 0        | 0        | 0 | 0        | 0 |
| BAD-TCF7L2     | 0 | 0        | 0        | 0        | 0        | 0.260026 | 0        | 0        | 0        | 0        | 0        | 0        | 0        | 0        | 0        | 0 | 0        | 0 |
| E2F2-RAD51     | 0 | 0        | 0        | 0        | 0        | 0        | 0        | 0        | 0        | 0.654719 | 0        | 0        | 0        | 0        | 0        | 0 | 0        | 0 |
| AKT1-AXIN1     | 0 | 0.220507 | 0        | 0        | 0        | 0        | 0        | 0        | 0        | 0        | 0        | 0        | 0        | 0        | 0        | 0 | 0        | 0 |
| HES1-TCF7L2    | 0 | 0.213493 | 0        | 0        | 0        | 0        | 0        | 0        | 0        | 0        | 0        | 0        | 0        | 0        | 0        | 0 | 0        | 0 |
| FRAT1-GSK3B    | 0 | 0.238505 | 0        | 0        | 0        | 0        | 0        | 0        | 0        | 0        | 0        | 0        | 0        | 0        | 0        | 0 | 0        | 0 |
| ARNT-HGF       | 0 | 0        | 0        | 0.22851  | 0        | 0        | 0        | 0        | 0        | 0        | 0        | 0        | 0        | 0        | 0        | 0 | 0        | 0 |
| IGF1R-PDGFRB   | 0 | 0        | 0        | 0        | 0        | 0.359454 | 0        | 0        | 0        | 0        | 0        | 0        | 0        | 0        | 0        | 0 | 0        | 0 |
| HMOX1-PRKCA    | 0 | 0        | 0        | 0        | 0        | 0        | 0.306999 | 0        | 0        | 0        | 0        | 0        | 0        | 0        | 0        | 0 | 0        | 0 |
| E2F3-LEF1      | 0 | 0        | 0        | 0        | 0        | 0        | 0        | 0        | 0        | 0        | 0        | 0.261937 | 0        | 0        | 0        | 0 | 0        | 0 |
