# Supplementary material for: Cancer Genetic Network Inference Using Gaussian Graphical Models
Source: PubMed Central journal article supplement — Bioinform Biol Insights. 2019 Apr 8;13:1177932219839402. doi: 10.1177/1177932219839402 (PMC6456846; doi:10.1177/1177932219839402), 2019-04-08
Supplement: Table_S2-GeneInteractionsInNormalNetworks_xyz13790a43a5179.pdf [file Table_S2-GeneInteractionsInNormalNetworks_xyz13790a43a5179.pdf]

|                 |          |          |          |          |          |          |          |          |          |          |
|-----------------|----------|----------|----------|----------|----------|----------|----------|----------|----------|----------|
| HRAS-MAPK1      | 0        | 0.377074 | 0        | 0        | 0        | 0        | 0        | 0        | 0.219007 | 0        |
| TGFB2-TGFB3     | 0        | 0        | 0.51302  | 0.391017 | 0        | 0        | 0        | 0        | 0        | 0        |
| HRAS-RB1        | 0.490191 | 0.523702 | 0        | 0        | 0        | 0        | 0        | 0        | 0        | 0        |
| HGF-HRAS        | 0        | 0        | 0        | 0.423733 | 0.211697 | 0        | 0        | 0        | 0        | 0        |
| HGF-MAP2K2      | 0        | 0        | 0        | 0.472304 | 0.249397 | 0        | 0        | 0        | 0        | 0        |
| AKT3-PIK3R1     | 0        | 0        | 0.304883 | 0        | 0        | 0        | 0        | 0.5225   | 0        | 0        |
| FZD2-TGFB1      | 0        | 0        | 0        | 0        | 0.345698 | 0        | 0        | 0.245352 | 0        | 0        |
| BAD-HGF         | 0        | 0        | 0        | 0.238    | 0.521341 | 0        | 0        | 0        | 0        | 0        |
| APC2-MTOR       | 0        | 0        | 0.483384 | 0        | 0        | 0        | 0        | 0.482654 | 0        | 0        |
| CDKN1A-E2F3     | 0        | 0        | 0        | 0        | 0.401759 | 0.464237 | 0        | 0        | 0        | 0        |
| CDH1-TP53       | 0.399618 | 0        | 0        | 0        | 0        | 0        | 0        | 0        | 0        | 0.211135 |
| HGF-SOS2        | 0        | 0        | 0        | 0.224553 | 0.235497 | 0        | 0        | 0        | 0        | 0        |
| AKT1-APC2       | 0        | 0        | 0        | 0        | 0        | 0        | 0        | 0.283071 | 0        | 0.426987 |
| FOS-JUN         | 0        | 0.541029 | 0.698831 | 0        | 0        | 0        | 0        | 0        | 0        | 0        |
| FZD1-FZD7       | 0        | 0.204616 | 0        | 0        | 0        | 0        | 0        | 0.275922 | 0        | 0        |
| BAK1-TGFB3      | 0        | 0        | 0.242653 | 0        | 0.310864 | 0        | 0        | 0        | 0        | 0        |
| WNT4-WNT5B      | 0        | 0.233203 | 0        | 0        | 0        | 0        | 0        | 0.32176  | 0        | 0        |
| EGFR-GSK3B      | 0        | 0.310934 | 0        | 0        | 0        | 0        | 0        | 0.219241 | 0        | 0        |
| AKT3-BAK1       | 0        | 0        | 0.26637  | 0        | 0        | 0        | 0        | 0.437111 | 0        | 0        |
| CDKN2A-E2F2     | 0.209236 | 0        | 0        | 0        | 0.219681 | 0        | 0        | 0        | 0        | 0        |
| AKT3-PIK3CA     | 0        | 0        | 0.422338 | 0        | 0        | 0        | 0        | 0        | 0        | 0.546025 |
| APC2-BAD        | 0        | 0        | 0.346773 | 0        | 0        | 0        | 0        | 0        | 0        | 0.34851  |
| AKT3-FGF2       | 0        | 0.248546 | 0        | 0        | 0        | 0        | 0        | 0.47636  | 0        | 0        |
| CDKN1A-TGFB3    | 0        | 0        | 0        | 0.297123 | 0.442398 | 0        | 0        | 0        | 0        | 0        |
| PIK3CA-SOS1     | 0        | 0.333178 | 0        | 0        | 0.263985 | 0        | 0        | 0        | 0        | 0        |
| BAX-HRAS        | 0        | 0        | 0        | 0        | 0        | 0        | 0        | 0        | 0.598386 | 0.250799 |
| WNT5B-WNT6      | 0        | 0.222153 | 0        | 0        | 0        | 0        | 0        | 0.229233 | 0        | 0        |
| LEF1-MAP2K1     | 0        | 0.220847 | 0        | 0        | 0        | 0        | 0        | 0        | 0.278631 | 0        |
| ERBB2-PIK3R3    | 0        | 0        | 0        | 0        | 0        | 0        | 0        | 0        | 0        | 0.41082  |
| ERBB2-PIK3R2    | 0        | 0.455684 | 0        | 0        | 0        | 0        | 0        | 0        | 0        | 0        |
| BAK1-EGF        | 0        | 0        | 0        | 0        | 0        | 0        | 0        | 0.234699 | 0        | 0        |
| ESR1-IGF1R      | 0        | 0.384503 | 0        | 0        | 0        | 0        | 0        | 0        | 0        | 0        |
| DLL4-FLT4       | 0        | 0.323665 | 0        | 0        | 0        | 0        | 0        | 0        | 0        | 0        |
| PAK3-TGFB3      | 0        | 0        | 0        | 0.209866 | 0        | 0        | 0        | 0        | 0        | 0        |
| AXIN1-DVL1      | 0        | 0.459603 | 0        | 0        | 0        | 0        | 0        | 0        | 0        | 0        |
| APC2-HRAS       | 0        | 0        | 0        | 0        | 0        | 0        | 0        | 0        | 0        | 0.272392 |
| FGFR3-MMP2      | 0.434426 | 0        | 0        | 0        | 0        | 0        | 0        | 0        | 0        | 0        |
| PDGFRA-SOS1     | 0        | 0        | 0        | 0        | 0        | 0        | 0.230428 | 0        | 0        | 0        |
| FZD1-WNT5B      | 0        | 0.336357 | 0        | 0        | 0        | 0        | 0        | 0        | 0        | 0        |
| CREB3L1-CTNNB1  | 0        | 0        | 0        | 0        | 0        | 0        | 0.213198 | 0        | 0        | 0        |
| HSP90AB1-PDGFR  | 0        | 0        | 0        | 0        | 0        | 0        | 0.26853  | 0        | 0        | 0        |
| CDKN1A-HIF1A    | 0        | 0        | 0        | 0.317985 | 0        | 0        | 0        | 0        | 0        | 0        |
| AKT2-HGF        | 0        | 0        | 0        | 0.264321 | 0        | 0        | 0        | 0        | 0        | 0        |
| CDH1-WNT10A     | 0        | 0        | 0        | 0        | 0        | 0        | 0        | 0.296024 | 0        | 0        |
| NRAS-PIK3R3     | 0        | 0        | 0        | 0        | 0        | 0        | 0        | 0        | 0        | 0.382202 |
| FZD1-TGFB2      | 0        | 0        | 0        | 0        | 0        | 0        | 0        | 0.235528 | 0        | 0        |
| LRP6-POLK       | 0        | 0.305546 | 0        | 0        | 0        | 0        | 0        | 0        | 0        | 0        |
| MMP9-PIK3CD     | 0        | 0        | 0        | 0        | 0        | 0        | 0.221215 | 0        | 0        | 0        |
| POLK-SOS1       | 0        | 0.303028 | 0        | 0        | 0        | 0        | 0        | 0        | 0        | 0        |
| CREB3L4-TMPRSS2 | 0        | 0        | 0        | 0        | 0        | 0        | 0.638307 | 0        | 0        | 0        |
| AXIN1-TGFB2     | 0        | 0        | 0.231871 | 0        | 0        | 0        | 0        | 0        | 0        | 0        |
| BAK1-TCF7       | 0        | 0        | 0        | 0        | 0        | 0        | 0        | 0        | 0.372699 | 0        |
| APC2-JUN        | 0        | 0        | 0.393735 | 0        | 0        | 0        | 0        | 0        | 0        | 0        |
| MMP1-NRAS       | 0.371531 | 0        | 0        | 0        | 0        | 0        | 0        | 0        | 0        | 0        |
| MTOR-WNT5A      | 0        | 0        | 0        | 0        | 0.220034 | 0        | 0        | 0        | 0        | 0        |
| BAK1-SHH        | 0        | 0        | 0        | 0        | 0        | 0        | 0        | 0.23598  | 0        | 0        |
| AREG-CDKN1A     | 0        | 0        | 0.329389 | 0        | 0        | 0        | 0        | 0        | 0        | 0        |





|               |          |          |          |          |          |          |          |          |   |          |
|---------------|----------|----------|----------|----------|----------|----------|----------|----------|---|----------|
| MAP2K2-RARB   | 0        | 0        | 0        | 0        | 0        | 0        | 0        | 0.518867 | 0 | 0        |
| ESR2-SOS1     | 0        | 0.305174 | 0        | 0        | 0        | 0        | 0        | 0        | 0 | 0        |
| CTNNA3-MAPK1  | 0        | 0        | 0        | 0        | 0        | 0        | 0        | 0        | 0 | 0.479656 |
| HRAS-NRAS     | 0        | 0.358266 | 0        | 0        | 0        | 0        | 0        | 0        | 0 | 0        |
| BAX-SHC2      | 0        | 0.390564 | 0        | 0        | 0        | 0        | 0        | 0        | 0 | 0        |
| BAK1-TGFBR1   | 0        | 0        | 0        | 0        | 0        | 0        | 0        | 0.224427 | 0 | 0        |
| FGF3-WNT8A    | 0        | 0        | 0        | 0        | 0        | 0        | 0        | 0.808786 | 0 | 0        |
| FGF8-WNT4     | 0        | 0        | 0        | 0        | 0        | 0        | 0        | 0.203584 | 0 | 0        |
| RARB-WNT3     | 0        | 0        | 0        | 0        | 0        | 0        | 0        | 0.732832 | 0 | 0        |
| CDKN2A-FZD3   | 0        | 0        | 0        | 0.285959 | 0        | 0        | 0        | 0        | 0 | 0        |
| FGF2-SHC4     | 0        | 0        | 0        | 0        | 0        | 0        | 0        | 0.433044 | 0 | 0        |
| ESR2-FGF2     | 0        | 0.353936 | 0        | 0        | 0        | 0        | 0        | 0        | 0 | 0        |
| EGFR-FOXO3    | 0        | 0        | 0        | 0        | 0        | 0.71384  | 0        | 0        | 0 | 0        |
| AKT3-TP53     | 0        | 0        | 0        | 0        | 0        | 0        | 0        | 0        | 0 | 0.318347 |
| PIK3R3-SHC2   | 0        | 0        | 0        | 0        | 0        | 0        | 0        | 0.228511 | 0 | 0        |
| FZD4-MAP2K1   | 0        | 0.540289 | 0        | 0        | 0        | 0        | 0        | 0        | 0 | 0        |
| EGF-RXRA      | 0        | 0        | 0        | 0        | 0        | 0        | 0        | 0.24821  | 0 | 0        |
| EGFR-ERBB2    | 0        | 0        | 0        | 0        | 0        | 0.20116  | 0        | 0        | 0 | 0        |
| CDKN1A-IL8    | 0.369105 | 0        | 0        | 0        | 0        | 0        | 0        | 0        | 0 | 0        |
| HMOX1-WNT5A   | 0        | 0        | 0        | 0        | 0.25541  | 0        | 0        | 0        | 0 | 0        |
| FGF8-FGF9     | 0        | 0        | 0        | 0        | 0        | 0        | 0        | 0.206034 | 0 | 0        |
| AKT1-SHC2     | 0        | 0        | 0        | 0        | 0        | 0        | 0        | 0.299565 | 0 | 0        |
| CCNE2-TERC    | 0        | 0        | 0        | 0        | 0        | 0        | 0        | 0.278036 | 0 | 0        |
| CDK6-LRP6     | 0        | 0.326196 | 0        | 0        | 0        | 0        | 0        | 0        | 0 | 0        |
| FGF10-FZD5    | 0        | 0        | 0        | 0        | 0        | 0        | 0        | 0.232355 | 0 | 0        |
| TGFB2-TP53    | 0        | 0        | 0.302672 | 0        | 0        | 0        | 0        | 0        | 0 | 0        |
| TGFB3-WNT9B   | 0        | 0        | 0        | 0        | 0.223337 | 0        | 0        | 0        | 0 | 0        |
| FGF9-FZD4     | 0        | 0        | 0        | 0        | 0        | 0        | 0        | 0.21352  | 0 | 0        |
| E2F1-TERT     | 0        | 0        | 0        | 0        | 0        | 0        | 0        | 0.339323 | 0 | 0        |
| HGF-SMARCC1   | 0        | 0        | 0        | 0        | 0.494143 | 0        | 0        | 0        | 0 | 0        |
| CDKN2B-FZD8   | 0        | 0        | 0        | 0        | 0        | 0        | 0        | 0.307806 | 0 | 0        |
| ILK-LEF1      | 0        | 0        | 0        | 0        | 0        | 0        | 0        | 0        | 0 | 0.26785  |
| AR-E2F1       | 0        | 0        | 0        | 0        | 0        | 0        | 0.207844 | 0        | 0 | 0        |
| FGF20-FZD5    | 0        | 0        | 0        | 0        | 0        | 0        | 0        | 0.211527 | 0 | 0        |
| FRAT1-HRAS    | 0        | 0.234528 | 0        | 0        | 0        | 0        | 0        | 0        | 0 | 0        |
| BAX-EGF       | 0        | 0        | 0        | 0        | 0        | 0.215695 | 0        | 0        | 0 | 0        |
| JUP-WNT7B     | 0        | 0        | 0        | 0        | 0        | 0        | 0        | 0.365476 | 0 | 0        |
| APC-SOS2      | 0        | 0.333436 | 0        | 0        | 0        | 0        | 0        | 0        | 0 | 0        |
| DDB2-ERBB2    | 0        | 0        | 0        | 0        | 0        | 0        | 0        | 0        | 0 | 0.547986 |
| SHH-SOS2      | 0        | 0        | 0        | 0        | 0        | 0        | 0        | 0.432139 | 0 | 0        |
| AXIN1-HMOX1   | 0        | 0        | 0        | 0        | 0.393247 | 0        | 0        | 0        | 0 | 0        |
| ATF4-PIK3R1   | 0        | 0        | 0        | 0        | 0        | 0        | 0.230406 | 0        | 0 | 0        |
| EPAS1-PAK3    | 0        | 0        | 0        | 0.38244  | 0        | 0        | 0        | 0        | 0 | 0        |
| HES5-MYC      | 0        | 0.241375 | 0        | 0        | 0        | 0        | 0        | 0        | 0 | 0        |
| EPAS1-PAK7    | 0        | 0        | 0        | 0.263516 | 0        | 0        | 0        | 0        | 0 | 0        |
| FGF9-RPS6KB1  | 0        | 0        | 0        | 0        | 0        | 0        | 0        | 0.222055 | 0 | 0        |
| AKT3-IGF1     | 0        | 0        | 0        | 0        | 0        | 0        | 0.285314 | 0        | 0 | 0        |
| APC-GADD45B   | 0        | 0        | 0        | 0        | 0        | 0        | 0        | 0        | 0 | 0.233827 |
| ACTL6A-GSTA1  | 0        | 0        | 0        | 0        | 0.221938 | 0        | 0        | 0        | 0 | 0        |
| GSTP1-NQO1    | 0        | 0        | 0        | 0        | 0.201186 | 0        | 0        | 0        | 0 | 0        |
| WNT3A-WNT8B   | 0        | 0        | 0        | 0        | 0        | 0        | 0        | 0.331497 | 0 | 0        |
| CDH17-MUC2    | 0        | 0        | 0        | 0        | 0        | 0        | 0        | 0.289813 | 0 | 0        |
| APC2-CCNE2    | 0        | 0        | 0        | 0        | 0        | 0        | 0        | 0.267396 | 0 | 0        |
| PIK3R1-PIK3R3 | 0        | 0        | 0        | 0        | 0        | 0        | 0        | 0.252166 | 0 | 0        |
| EGLN3-PAK7    | 0        | 0        | 0        | 0.496424 | 0        | 0        | 0        | 0        | 0 | 0        |
| FZD5-WNT4     | 0        | 0.283282 | 0        | 0        | 0        | 0        | 0        | 0        | 0 | 0        |
| PAK7-VEGFA    | 0        | 0        | 0        | 0.312702 | 0        | 0        | 0        | 0        | 0 | 0        |

|                |          |          |          |          |          |   |          |          |   |          |
|----------------|----------|----------|----------|----------|----------|---|----------|----------|---|----------|
| ILK-TCF7       | 0        | 0        | 0        | 0        | 0        | 0 | 0        | 0        | 0 | 0.621143 |
| CDKN1A-SRD5A2  | 0        | 0        | 0        | 0        | 0        | 0 | 0.366815 | 0        | 0 | 0        |
| FZD10-WNT4     | 0        | 0        | 0        | 0        | 0        | 0 | 0        | 0.269583 | 0 | 0        |
| FOXO3-HRAS     | 0        | 0        | 0        | 0        | 0        | 0 | 0        | 0        | 0 | 0.367899 |
| TGFB2-TGFBR2   | 0        | 0        | 0.329518 | 0        | 0        | 0 | 0        | 0        | 0 | 0        |
| CCNE2-CDKN1A   | 0        | 0        | 0        | 0        | 0        | 0 | 0        | 0.257731 | 0 | 0        |
| HGF-RAP1B      | 0        | 0        | 0        | 0.225634 | 0        | 0 | 0        | 0        | 0 | 0        |
| TGFB2-WNT2B    | 0        | 0        | 0        | 0        | 0.208497 | 0 | 0        | 0        | 0 | 0        |
| FH-TGFB2       | 0        | 0        | 0        | 0.248908 | 0        | 0 | 0        | 0        | 0 | 0        |
| CTNNA2-WNT3A   | 0        | 0        | 0        | 0        | 0        | 0 | 0        | 0.265749 | 0 | 0        |
| PAK7-TGFB1     | 0        | 0        | 0        | 0.322775 | 0        | 0 | 0        | 0        | 0 | 0        |
| HGF-KRAS       | 0        | 0        | 0        | 0        | 0.22156  | 0 | 0        | 0        | 0 | 0        |
| FGF22-TGFB2    | 0        | 0        | 0        | 0        | 0        | 0 | 0        | 0.227815 | 0 | 0        |
| E2F2-NRAS      | 0        | 0        | 0        | 0        | 0        | 0 | 0        | 0.526367 | 0 | 0        |
| APC-BRCA2      | 0        | 0.248299 | 0        | 0        | 0        | 0 | 0        | 0        | 0 | 0        |
| EGFR-SMAD3     | 0        | 0        | 0.430326 | 0        | 0        | 0 | 0        | 0        | 0 | 0        |
| AKT3-TCF7L1    | 0        | 0        | 0.975867 | 0        | 0        | 0 | 0        | 0        | 0 | 0        |
| E2F3-TGFBR2    | 0        | 0        | 0        | 0        | 0.209312 | 0 | 0        | 0        | 0 | 0        |
| SHH-WNT5A      | 0        | 0        | 0        | 0        | 0        | 0 | 0        | 0.201816 | 0 | 0        |
| MAPK1-RPS6KA5  | 0.244613 | 0        | 0        | 0        | 0        | 0 | 0        | 0        | 0 | 0        |
| TGFB2-TGFBR1   | 0        | 0        | 0.587636 | 0        | 0        | 0 | 0        | 0        | 0 | 0        |
| PAK7-SLC2A1    | 0        | 0        | 0        | 0.289005 | 0        | 0 | 0        | 0        | 0 | 0        |
| AKT3-MAP2K2    | 0        | 0        | 0.492686 | 0        | 0        | 0 | 0        | 0        | 0 | 0        |
| KRAS-PIK3R3    | 0        | 0        | 0        | 0        | 0        | 0 | 0        | 0        | 0 | 0.619624 |
| GSTP1-TGFB1    | 0        | 0        | 0        | 0        | 0.377665 | 0 | 0        | 0        | 0 | 0        |
| CTNNA3-WNT9A   | 0        | 0        | 0        | 0        | 0        | 0 | 0        | 0.235717 | 0 | 0        |
| MAP2K2-PIK3CA  | 0        | 0        | 0        | 0        | 0.319088 | 0 | 0        | 0        | 0 | 0        |
| ARAF-SHH       | 0        | 0        | 0        | 0        | 0        | 0 | 0        | 0.559565 | 0 | 0        |
| HRAS-SHC2      | 0        | 0.352319 | 0        | 0        | 0        | 0 | 0        | 0        | 0 | 0        |
| PIK3CA-PIK3R3  | 0        | 0        | 0        | 0        | 0        | 0 | 0        | 0        | 0 | 0.407986 |
| FGF7-FZD10     | 0        | 0        | 0        | 0        | 0        | 0 | 0        | 0.318519 | 0 | 0        |
| MDM2-TGFA      | 0        | 0        | 0        | 0        | 0        | 0 | 0.307663 | 0        | 0 | 0        |
| JUP-WNT10A     | 0        | 0        | 0        | 0        | 0        | 0 | 0        | 0.30313  | 0 | 0        |
| FGF1-WNT9A     | 0        | 0        | 0        | 0        | 0        | 0 | 0        | 0.387835 | 0 | 0        |
| FGF2-PIK3CB    | 0        | 0.268086 | 0        | 0        | 0        | 0 | 0        | 0        | 0 | 0        |
| EGFR-RXRA      | 0        | 0        | 0        | 0        | 0        | 0 | 0        | 0.356292 | 0 | 0        |
| HGF-PLCG1      | 0        | 0        | 0        | 0        | 0.216357 | 0 | 0        | 0        | 0 | 0        |
| E2F3-RB1       | 0        | 0        | 0        | 0        | 0.366762 | 0 | 0        | 0        | 0 | 0        |
| GADD45A-PIK3R1 | 0        | 0        | 0        | 0        | 0        | 0 | 0        | 0        | 0 | 0.215693 |
| GADD45A-PIK3R2 | 0        | 0        | 0        | 0        | 0        | 0 | 0        | 0        | 0 | 0.291043 |
| HMOX1-PIK3R1   | 0        | 0        | 0        | 0        | 0.240818 | 0 | 0        | 0        | 0 | 0        |
| DCC-PIK3R3     | 0        | 0        | 0.378639 | 0        | 0        | 0 | 0        | 0        | 0 | 0        |
| CCNE2-WNT10A   | 0        | 0        | 0        | 0        | 0        | 0 | 0        | 0.28009  | 0 | 0        |
| WNT3A-WNT5A    | 0        | 0        | 0        | 0        | 0        | 0 | 0        | 0.273293 | 0 | 0        |
| CCND1-RPS6KA5  | 0.49901  | 0        | 0        | 0        | 0        | 0 | 0        | 0        | 0 | 0        |
| LEF1-PLCG1     | 0        | 0        | 0        | 0        | 0.209568 | 0 | 0        | 0        | 0 | 0        |
| GSTO1-HGF      | 0        | 0        | 0        | 0        | 0.272627 | 0 | 0        | 0        | 0 | 0        |
| PIK3CD-PIK3R3  | 0        | 0        | 0        | 0        | 0        | 0 | 0        | 0        | 0 | 0.392863 |
| CDKN1A-GAB1    | 0        | 0        | 0        | 0        | 0.280223 | 0 | 0        | 0        | 0 | 0        |
| AXIN1-HRAS     | 0        | 0.577187 | 0        | 0        | 0        | 0 | 0        | 0        | 0 | 0        |
| EGF-SHC3       | 0        | 0        | 0        | 0        | 0        | 0 | 0        | 0.285196 | 0 | 0        |
| FGF19-WNT10B   | 0        | 0        | 0        | 0        | 0        | 0 | 0        | 0.31006  | 0 | 0        |
| NRAS-UPK3A     | 0.23295  | 0        | 0        | 0        | 0        | 0 | 0        | 0        | 0 | 0        |
| LEF1-TP53      | 0        | 0        | 0        | 0        | 0        | 0 | 0        | 0.402511 | 0 | 0        |
| RXRG-SHC4      | 0        | 0        | 0        | 0        | 0        | 0 | 0        | 0.203642 | 0 | 0        |
| FGF3-WNT10A    | 0        | 0        | 0        | 0        | 0        | 0 | 0        | 0.244472 | 0 | 0        |
| GADD45B-PRKCG  | 0        | 0        | 0        | 0        | 0.28495  | 0 | 0        | 0        | 0 | 0        |

|               |          |          |          |          |          |          |          |          |          |          |
|---------------|----------|----------|----------|----------|----------|----------|----------|----------|----------|----------|
| RARB-WNT7B    | 0        | 0        | 0        | 0        | 0        | 0        | 0        | 0.200649 | 0        | 0        |
| AKT3-EGFR     | 0        | 0        | 0        | 0        | 0        | 0.233539 | 0        | 0        | 0        | 0        |
| RARB-WNT7A    | 0        | 0        | 0        | 0        | 0        | 0        | 0        | 0.277668 | 0        | 0        |
| EGFR-SHC2     | 0        | 0        | 0        | 0        | 0.26827  | 0        | 0        | 0        | 0        | 0        |
| PAK7-TGFA     | 0        | 0        | 0        | 0.320947 | 0        | 0        | 0        | 0        | 0        | 0        |
| JAK3-PLCG2    | 0        | 0        | 0        | 0        | 0        | 0.322196 | 0        | 0        | 0        | 0        |
| RB1-SHH       | 0        | 0        | 0        | 0        | 0        | 0        | 0        | 0.247293 | 0        | 0        |
| DVL2-WNT9A    | 0        | 0        | 0        | 0        | 0        | 0        | 0        | 0.257357 | 0        | 0        |
| WNT10B-WNT2   | 0        | 0.250272 | 0        | 0        | 0        | 0        | 0        | 0        | 0        | 0        |
| AKT3-IGF1R    | 0        | 0        | 0        | 0        | 0.291294 | 0        | 0        | 0        | 0        | 0        |
| LEF1-TXNRD2   | 0        | 0        | 0        | 0        | 0.274293 | 0        | 0        | 0        | 0        | 0        |
| E2F3-EGF      | 0.340929 | 0        | 0        | 0        | 0        | 0        | 0        | 0        | 0        | 0        |
| NRAS-TGFA     | 0        | 0        | 0.583941 | 0        | 0        | 0        | 0        | 0        | 0        | 0        |
| E2F1-ERG      | 0        | 0        | 0        | 0        | 0        | 0        | 0.213178 | 0        | 0        | 0        |
| FZD6-KIT      | 0        | 0.227248 | 0        | 0        | 0        | 0        | 0        | 0        | 0        | 0        |
| BRAF-LRP6     | 0        | 0.276052 | 0        | 0        | 0        | 0        | 0        | 0        | 0        | 0        |
| CTNNA1-ERBB2  | 0        | 0        | 0        | 0        | 0        | 0        | 0        | 0.284839 | 0        | 0        |
| FZD3-IGF1R    | 0        | 0.293581 | 0        | 0        | 0        | 0        | 0        | 0        | 0        | 0        |
| ERBB2-FZD5    | 0        | 0        | 0        | 0        | 0        | 0        | 0        | 0.275061 | 0        | 0        |
| E2F2-JAK3     | 0        | 0        | 0        | 0        | 0        | 0.382156 | 0        | 0        | 0        | 0        |
| CDKN1A-FRAT2  | 0        | 0.545417 | 0        | 0        | 0        | 0        | 0        | 0        | 0        | 0        |
| CSNK1A1-WNT3A | 0        | 0        | 0        | 0        | 0        | 0        | 0        | 0.346033 | 0        | 0        |
| CSNK1A1L-FGF3 | 0        | 0        | 0        | 0        | 0        | 0        | 0        | 0.349107 | 0        | 0        |
| E2F2-PIK3CD   | 0        | 0        | 0        | 0        | 0        | 0.218748 | 0        | 0        | 0        | 0        |
| LEF1-SMAD2    | 0        | 0        | 0        | 0        | 0.236754 | 0        | 0        | 0        | 0        | 0        |
| KLK3-RAF1     | 0        | 0        | 0        | 0        | 0        | 0        | 0.215701 | 0        | 0        | 0        |
| SOS1-WNT3     | 0        | 0        | 0        | 0        | 0        | 0        | 0        | 0.313178 | 0        | 0        |
| DDB2-PIK3CB   | 0        | 0        | 0        | 0        | 0        | 0        | 0        | 0        | 0        | 0.269775 |
| CSNK1A1L-FZD3 | 0        | 0        | 0        | 0        | 0.222334 | 0        | 0        | 0        | 0        | 0        |
| HIF1A-SLC2A1  | 0        | 0        | 0        | 0.407953 | 0        | 0        | 0        | 0        | 0        | 0        |
| PIK3R3-POLK   | 0        | 0        | 0        | 0        | 0        | 0        | 0        | 0        | 0        | 0.308437 |
| MET-SHH       | 0        | 0        | 0        | 0        | 0        | 0        | 0        | 0.33727  | 0        | 0        |
| FGFR3-MAPK3   | 0.378964 | 0        | 0        | 0        | 0        | 0        | 0        | 0        | 0        | 0        |
| EGFR-RPS6KA5  | 0.426652 | 0        | 0        | 0        | 0        | 0        | 0        | 0        | 0        | 0        |
| AKT2-HRAS     | 0        | 0.273944 | 0        | 0        | 0        | 0        | 0        | 0        | 0        | 0        |
| ERBB2-FGFR3   | 0.648526 | 0        | 0        | 0        | 0        | 0        | 0        | 0        | 0        | 0        |
| FGFR2-WNT9B   | 0        | 0        | 0        | 0        | 0        | 0        | 0        | 0.217448 | 0        | 0        |
| TGFBR2-WNT1   | 0        | 0        | 0        | 0        | 0        | 0        | 0        | 0.249458 | 0        | 0        |
| FZD7-GSTM5    | 0        | 0        | 0        | 0        | 0.200608 | 0        | 0        | 0        | 0        | 0        |
| WNT7A-WNT7B   | 0        | 0        | 0        | 0        | 0.379899 | 0        | 0        | 0        | 0        | 0        |
| MAPK3-RARB    | 0        | 0        | 0        | 0        | 0        | 0        | 0        | 0.214632 | 0        | 0        |
| FZD10-WNT7A   | 0        | 0        | 0        | 0        | 0        | 0        | 0        | 0.248159 | 0        | 0        |
| ATF4-MMP9     | 0        | 0        | 0        | 0        | 0        | 0        | 0.201174 | 0        | 0        | 0        |
| ERBB2-WNT3    | 0        | 0.21117  | 0        | 0        | 0        | 0        | 0        | 0        | 0        | 0        |
| E2F3-TXNRD2   | 0        | 0        | 0        | 0        | 0.200863 | 0        | 0        | 0        | 0        | 0        |
| GAB1-SHH      | 0        | 0        | 0        | 0        | 0        | 0        | 0        | 0.257901 | 0        | 0        |
| PRKCB-TGFB1   | 0        | 0        | 0        | 0        | 0.29231  | 0        | 0        | 0        | 0        | 0        |
| CDH1-UPK3A    | 0.210967 | 0        | 0        | 0        | 0        | 0        | 0        | 0        | 0        | 0        |
| HRAS-RPS6KB2  | 0        | 0.466644 | 0        | 0        | 0        | 0        | 0        | 0        | 0        | 0        |
| BAK1-HRAS     | 0        | 0.399287 | 0        | 0        | 0        | 0        | 0        | 0        | 0        | 0        |
| CREB3L3-E2F2  | 0        | 0        | 0        | 0        | 0        | 0        | 0.221235 | 0        | 0        | 0        |
| BAX-MAP2K2    | 0        | 0        | 0        | 0        | 0        | 0        | 0        | 0        | 0.426221 | 0        |
| AR-SOS2       | 0        | 0        | 0        | 0        | 0        | 0        | 0.288933 | 0        | 0        | 0        |
| CDKN2A-HBEGF  | 0.471211 | 0        | 0        | 0        | 0        | 0        | 0        | 0        | 0        | 0        |
| AR-SOS1       | 0        | 0        | 0        | 0        | 0        | 0        | 0.276393 | 0        | 0        | 0        |
| HBEGF-MDM2    | 0.293471 | 0        | 0        | 0        | 0        | 0        | 0        | 0        | 0        | 0        |
| TCF7L1-TGFB3  | 0        | 0        | 0.463819 | 0        | 0        | 0        | 0        | 0        | 0        | 0        |

|                |          |          |          |          |          |   |          |          |   |          |
|----------------|----------|----------|----------|----------|----------|---|----------|----------|---|----------|
| BCL2-FGFR2     | 0        | 0        | 0        | 0        | 0        | 0 | 0.50594  | 0        | 0 | 0        |
| NOTCH1-NOTCH3  | 0        | 0.33455  | 0        | 0        | 0        | 0 | 0        | 0        | 0 | 0        |
| E2F3-MMP2      | 0.329691 | 0        | 0        | 0        | 0        | 0 | 0        | 0        | 0 | 0        |
| EGF-PIK3R3     | 0        | 0        | 0        | 0        | 0        | 0 | 0        | 0        | 0 | 0.31916  |
| NFKB2-WNT9A    | 0        | 0.249065 | 0        | 0        | 0        | 0 | 0        | 0        | 0 | 0        |
| CTNNA2-FGF20   | 0        | 0        | 0        | 0        | 0        | 0 | 0        | 0.200328 | 0 | 0        |
| IGF1R-ZEB1     | 0        | 0        | 0        | 0        | 0        | 0 | 0.232577 | 0        | 0 | 0        |
| KLK3-TCF7L2    | 0        | 0        | 0        | 0        | 0        | 0 | 0.361889 | 0        | 0 | 0        |
| CDH1-ERBB2     | 0        | 0        | 0        | 0        | 0        | 0 | 0        | 0        | 0 | 0.214118 |
| WNT5B-WNT7B    | 0        | 0        | 0        | 0        | 0        | 0 | 0        | 0.26687  | 0 | 0        |
| AXIN2-TGFBR2   | 0        | 0        | 0        | 0        | 0        | 0 | 0        | 0.464651 | 0 | 0        |
| AR-EGFR        | 0        | 0        | 0        | 0        | 0        | 0 | 0.679459 | 0        | 0 | 0        |
| HGF-PIK3CA     | 0        | 0        | 0        | 0.44944  | 0        | 0 | 0        | 0        | 0 | 0        |
| HGF-PIK3CB     | 0        | 0        | 0        | 0        | 0.374759 | 0 | 0        | 0        | 0 | 0        |
| PIK3CA-SOS2    | 0        | 0        | 0        | 0        | 0.535023 | 0 | 0        | 0        | 0 | 0        |
| FZD9-MAP2K2    | 0        | 0.226995 | 0        | 0        | 0        | 0 | 0        | 0        | 0 | 0        |
| AKT2-DVL1      | 0        | 0.230499 | 0        | 0        | 0        | 0 | 0        | 0        | 0 | 0        |
| MAP2K2-RPS6KA5 | 0.548618 | 0        | 0        | 0        | 0        | 0 | 0        | 0        | 0 | 0        |
| E2F1-SHH       | 0        | 0        | 0        | 0        | 0        | 0 | 0        | 0.273619 | 0 | 0        |
| AKT3-HRAS      | 0        | 0        | 0        | 0        | 0        | 0 | 0        | 0        | 0 | 0.391863 |
| KIT-TP53       | 0        | 0.360087 | 0        | 0        | 0        | 0 | 0        | 0        | 0 | 0        |
| FGF2-RPS6KB2   | 0        | 0.227123 | 0        | 0        | 0        | 0 | 0        | 0        | 0 | 0        |
| CTNNA1-SHC4    | 0        | 0.243946 | 0        | 0        | 0        | 0 | 0        | 0        | 0 | 0        |
| GSTO1-WNT6     | 0        | 0        | 0        | 0        | 0.230561 | 0 | 0        | 0        | 0 | 0        |
| FGFR1-IGF1     | 0        | 0        | 0        | 0        | 0        | 0 | 0.32447  | 0        | 0 | 0        |
| FGF1-TCF7      | 0        | 0        | 0        | 0        | 0        | 0 | 0        | 0.327306 | 0 | 0        |
| DLL1-JUN       | 0        | 0.27005  | 0        | 0        | 0        | 0 | 0        | 0        | 0 | 0        |
| EGFR-IGF1R     | 0        | 0        | 0        | 0        | 0        | 0 | 0.202124 | 0        | 0 | 0        |
| GSTA4-GSTO2    | 0        | 0        | 0        | 0        | 0.2244   | 0 | 0        | 0        | 0 | 0        |
| RAC1-TGFA      | 0        | 0        | 0.243092 | 0        | 0        | 0 | 0        | 0        | 0 | 0        |
| BRCA2-KRAS     | 0        | 0.213515 | 0        | 0        | 0        | 0 | 0        | 0        | 0 | 0        |
| FZD2-GSTA5     | 0        | 0        | 0        | 0        | 0.272885 | 0 | 0        | 0        | 0 | 0        |
| APC2-TP53      | 0        | 0        | 0        | 0        | 0        | 0 | 0        | 0        | 0 | 0.381741 |
| CDKN2B-MLH1    | 0        | 0        | 0        | 0        | 0        | 0 | 0        | 0.269585 | 0 | 0        |
| FGF6-TCF7      | 0        | 0.322795 | 0        | 0        | 0        | 0 | 0        | 0        | 0 | 0        |
| PDGFB-PDGFR    | 0        | 0        | 0        | 0        | 0        | 0 | 0.287365 | 0        | 0 | 0        |
| KRAS-TGFB3     | 0        | 0        | 0        | 0        | 0.205767 | 0 | 0        | 0        | 0 | 0        |
| AR-PIK3R1      | 0        | 0        | 0        | 0        | 0        | 0 | 0.286734 | 0        | 0 | 0        |
| CTNNA2-E2F2    | 0        | 0        | 0        | 0        | 0        | 0 | 0        | 0.266737 | 0 | 0        |
| FGF6-RAF1      | 0        | 0.422388 | 0        | 0        | 0        | 0 | 0        | 0        | 0 | 0        |
| CSNK1A1L-WNT5B | 0        | 0        | 0        | 0        | 0        | 0 | 0        | 0.212789 | 0 | 0        |
| APC-CDK6       | 0        | 0        | 0        | 0        | 0.282485 | 0 | 0        | 0        | 0 | 0        |
| EGFR-FGF10     | 0        | 0.262918 | 0        | 0        | 0        | 0 | 0        | 0        | 0 | 0        |
| FGF2-WNT16     | 0        | 0        | 0        | 0        | 0        | 0 | 0        | 0.248377 | 0 | 0        |
| CDKN1A-DLL4    | 0        | 0.293312 | 0        | 0        | 0        | 0 | 0        | 0        | 0 | 0        |
| MMP9-PDGFR     | 0        | 0        | 0        | 0        | 0        | 0 | 0.22199  | 0        | 0 | 0        |
| AKT2-WNT9A     | 0        | 0        | 0        | 0        | 0        | 0 | 0        | 0.293163 | 0 | 0        |
| IGF1R-PGR      | 0        | 0.331592 | 0        | 0        | 0        | 0 | 0        | 0        | 0 | 0        |
| TCEB2-TGFB2    | 0        | 0        | 0        | 0.226411 | 0        | 0 | 0        | 0        | 0 | 0        |
| ERBB2-ZEB1     | 0        | 0        | 0        | 0        | 0        | 0 | 0.300018 | 0        | 0 | 0        |
| APC2-CDKN2A    | 0        | 0        | 0        | 0        | 0.229404 | 0 | 0        | 0        | 0 | 0        |
| ARAF-MYC       | 0        | 0        | 0        | 0        | 0        | 0 | 0        | 0        | 0 | 0.605721 |
| ARID1A-GAB1    | 0        | 0        | 0        | 0        | 0.279932 | 0 | 0        | 0        | 0 | 0        |
| CREB3L1-TP53   | 0        | 0        | 0        | 0        | 0        | 0 | 0.200405 | 0        | 0 | 0        |
| APC2-BIRC5     | 0        | 0        | 0.240461 | 0        | 0        | 0 | 0        | 0        | 0 | 0        |
| MAP2K2-TYMP    | 0.406928 | 0        | 0        | 0        | 0        | 0 | 0        | 0        | 0 | 0        |
| GSTP1-SMARCD3  | 0        | 0        | 0        | 0        | 0.486521 | 0 | 0        | 0        | 0 | 0        |





|                |          |          |          |          |          |          |          |          |          |          |
|----------------|----------|----------|----------|----------|----------|----------|----------|----------|----------|----------|
| E2F1-EGFR      | 0.285728 | 0        | 0        | 0        | 0        | 0        | 0        | 0        | 0        | 0        |
| EGLN2-HRAS     | 0        | 0        | 0        | 0.253132 | 0        | 0        | 0        | 0        | 0        | 0        |
| CDKN1A-POLK    | 0        | 0        | 0.471562 | 0        | 0        | 0        | 0        | 0        | 0        | 0        |
| BRAF-PIK3R3    | 0        | 0        | 0        | 0        | 0        | 0        | 0        | 0        | 0        | 0.233224 |
| BAK1-IGF2      | 0        | 0        | 0        | 0        | 0.289221 | 0        | 0        | 0        | 0        | 0        |
| FRAT1-SHH      | 0        | 0        | 0        | 0        | 0        | 0        | 0        | 0.417938 | 0        | 0        |
| DLL4-NOTCH4    | 0        | 0.559868 | 0        | 0        | 0        | 0        | 0        | 0        | 0        | 0        |
| CCND1-FGF1     | 0        | 0.293491 | 0        | 0        | 0        | 0        | 0        | 0        | 0        | 0        |
| EGF-RPS6KA5    | 0.517198 | 0        | 0        | 0        | 0        | 0        | 0        | 0        | 0        | 0        |
| MAP2K1-SMARCD3 | 0        | 0        | 0        | 0        | 0.313324 | 0        | 0        | 0        | 0        | 0        |
| HRAS-TPR       | 0        | 0        | 0        | 0        | 0        | 0        | 0        | 0        | 0.813827 | 0        |
| EGFR-FGFR2     | 0        | 0        | 0        | 0        | 0        | 0        | 0.270616 | 0        | 0        | 0        |
| EGF-SOS2       | 0        | 0.210254 | 0        | 0        | 0        | 0        | 0        | 0        | 0        | 0        |
| BAK1-GADD45A   | 0        | 0        | 0        | 0        | 0        | 0        | 0        | 0        | 0.235082 | 0        |
| AKT2-FZD4      | 0        | 0.225914 | 0        | 0        | 0        | 0        | 0        | 0        | 0        | 0        |
| CDKN1A-MAPK10  | 0        | 0        | 0.367846 | 0        | 0        | 0        | 0        | 0        | 0        | 0        |
| BRCA2-CDK6     | 0        | 0.524553 | 0        | 0        | 0        | 0        | 0        | 0        | 0        | 0        |
| JUP-MAPK3      | 0        | 0        | 0        | 0        | 0        | 0        | 0        | 0.30096  | 0        | 0        |
| ESR2-NOTCH1    | 0        | 0.24389  | 0        | 0        | 0        | 0        | 0        | 0        | 0        | 0        |
| TCF7L1-WNT9A   | 0        | 0        | 0        | 0        | 0        | 0        | 0        | 0.421346 | 0        | 0        |
| AR-NRAS        | 0        | 0        | 0        | 0        | 0        | 0        | 0.267101 | 0        | 0        | 0        |
| FGFR1-ZEB1     | 0        | 0        | 0        | 0        | 0        | 0        | 0.726854 | 0        | 0        | 0        |
| FGF2-MAP2K2    | 0        | 0.359584 | 0        | 0        | 0        | 0        | 0        | 0        | 0        | 0        |
| BAD-POLK       | 0        | 0        | 0        | 0        | 0        | 0        | 0        | 0        | 0        | 0.327973 |
| BAX-TPR        | 0        | 0        | 0        | 0        | 0        | 0        | 0        | 0        | 0.300753 | 0        |
| LRP6-PIK3CA    | 0        | 0        | 0        | 0        | 0.215468 | 0        | 0        | 0        | 0        | 0        |
| CDKN1A-FGF17   | 0        | 0        | 0        | 0        | 0        | 0        | 0        | 0.290622 | 0        | 0        |
| GSTO2-NQO1     | 0        | 0        | 0        | 0        | 0.214725 | 0        | 0        | 0        | 0        | 0        |
| AXIN2-GADD45A  | 0        | 0        | 0        | 0        | 0        | 0        | 0        | 0        | 0        | 0.21797  |
| CDKN1A-PLAT    | 0        | 0        | 0        | 0        | 0        | 0        | 0.483273 | 0        | 0        | 0        |
| APC2-CASP3     | 0        | 0        | 0.591245 | 0        | 0        | 0        | 0        | 0        | 0        | 0        |
| E2F3-KRAS      | 0        | 0        | 0        | 0        | 0.383031 | 0        | 0        | 0        | 0        | 0        |
| DVL2-WNT6      | 0        | 0.439158 | 0        | 0        | 0        | 0        | 0        | 0        | 0        | 0        |
| TGFA-WNT7B     | 0        | 0        | 0        | 0        | 0.214801 | 0        | 0        | 0        | 0        | 0        |
| HEYL-WNT2      | 0        | 0.226474 | 0        | 0        | 0        | 0        | 0        | 0        | 0        | 0        |
| ERBB2-WNT3A    | 0        | 0        | 0        | 0        | 0        | 0        | 0        | 0.231101 | 0        | 0        |
| GADD45A-WNT7A  | 0        | 0        | 0        | 0        | 0.218939 | 0        | 0        | 0        | 0        | 0        |
| SOS2-TGFA      | 0        | 0        | 0.328619 | 0        | 0        | 0        | 0        | 0        | 0        | 0        |
| FZD3-WNT5A     | 0        | 0.27558  | 0        | 0        | 0        | 0        | 0        | 0        | 0        | 0        |
| AREG-PMAIP1    | 0        | 0        | 0.227793 | 0        | 0        | 0        | 0        | 0        | 0        | 0        |
| BRCA2-E2F2     | 0        | 0.401769 | 0        | 0        | 0        | 0        | 0        | 0        | 0        | 0        |
| BRCA2-E2F3     | 0        | 0.508348 | 0        | 0        | 0        | 0        | 0        | 0        | 0        | 0        |
| MMP2-THBS1     | 0.24025  | 0        | 0        | 0        | 0        | 0        | 0        | 0        | 0        | 0        |
| PAK1-PAK7      | 0        | 0        | 0        | 0.236563 | 0        | 0        | 0        | 0        | 0        | 0        |
| CREB1-MMP9     | 0        | 0        | 0        | 0        | 0        | 0        | 0.200067 | 0        | 0        | 0        |
| FGFR3-VEGFA    | 0.231395 | 0        | 0        | 0        | 0        | 0        | 0        | 0        | 0        | 0        |
| BCL2-ERG       | 0        | 0        | 0        | 0        | 0        | 0        | 0.241182 | 0        | 0        | 0        |
| CCND1-EGF      | 0        | 0        | 0        | 0        | 0        | 0        | 0        | 0        | 0        | 0.292628 |
| HEYL-KIT       | 0        | 0.204608 | 0        | 0        | 0        | 0        | 0        | 0        | 0        | 0        |
| LRP5-NOTCH3    | 0        | 0.313763 | 0        | 0        | 0        | 0        | 0        | 0        | 0        | 0        |
| IGF1-PDGFRA    | 0        | 0        | 0        | 0        | 0        | 0        | 0.661547 | 0        | 0        | 0        |
| AR-CREB3L1     | 0        | 0        | 0        | 0        | 0        | 0        | 0.306519 | 0        | 0        | 0        |
| LEF1-SMARCD1   | 0        | 0        | 0        | 0        | 0.284655 | 0        | 0        | 0        | 0        | 0        |
| AR-CREB3L2     | 0        | 0        | 0        | 0        | 0        | 0        | 0.40397  | 0        | 0        | 0        |
| CDH1-CDH17     | 0        | 0        | 0        | 0        | 0        | 0        | 0        | 0.278633 | 0        | 0        |
| FZD4-MYC       | 0        | 0.249285 | 0        | 0        | 0        | 0        | 0        | 0        | 0        | 0        |
| JAK3-PRKCB     | 0        | 0        | 0        | 0        | 0        | 0.597002 | 0        | 0        | 0        | 0        |

|               |          |          |          |          |          |          |          |          |          |          |
|---------------|----------|----------|----------|----------|----------|----------|----------|----------|----------|----------|
| ERBB2-GADD45G | 0        | 0        | 0        | 0        | 0        | 0        | 0        | 0        | 0        | 0.235404 |
| CDKN2A-WNT10A | 0        | 0        | 0        | 0        | 0.341561 | 0        | 0        | 0        | 0        | 0        |
| FZD1-KIT      | 0        | 0.220278 | 0        | 0        | 0        | 0        | 0        | 0        | 0        | 0        |
| ESR2-IGF1     | 0        | 0.235223 | 0        | 0        | 0        | 0        | 0        | 0        | 0        | 0        |
| FZD3-LRP6     | 0        | 0        | 0        | 0        | 0        | 0        | 0        | 0.390117 | 0        | 0        |
| ABCB1-FZD10   | 0        | 0        | 0        | 0        | 0        | 0        | 0        | 0.278977 | 0        | 0        |
| FGFR2-SRD5A2  | 0        | 0        | 0        | 0        | 0        | 0.209294 | 0        | 0        | 0        | 0        |
| FZD9-MUC2     | 0        | 0        | 0        | 0        | 0        | 0        | 0        | 0.202932 | 0        | 0        |
| BRAF-REG4     | 0        | 0        | 0        | 0        | 0        | 0        | 0        | 0.262382 | 0        | 0        |
| AR-PIK3CA     | 0        | 0        | 0        | 0        | 0        | 0.686088 | 0        | 0        | 0        | 0        |
| AR-PIK3CB     | 0        | 0        | 0        | 0        | 0        | 0.358764 | 0        | 0        | 0        | 0        |
| CTNNB1-HGF    | 0        | 0        | 0        | 0        | 0.320666 | 0        | 0        | 0        | 0        | 0        |
| CDH1-FGFR3    | 0.888012 | 0        | 0        | 0        | 0        | 0        | 0        | 0        | 0        | 0        |
| ARNT2-PAK6    | 0        | 0        | 0        | 0.429682 | 0        | 0        | 0        | 0        | 0        | 0        |
| EGFR-NOTCH2   | 0        | 0.833459 | 0        | 0        | 0        | 0        | 0        | 0        | 0        | 0        |
| IGF1R-MMP3    | 0        | 0        | 0        | 0        | 0        | 0.231144 | 0        | 0        | 0        | 0        |
| CTNNA2-SHC2   | 0        | 0        | 0        | 0        | 0        | 0        | 0.24563  | 0        | 0        | 0        |
| CCND1-RXRG    | 0        | 0        | 0        | 0        | 0        | 0        | 0        | 0.269911 | 0        | 0        |
| FGF18-WNT4    | 0        | 0        | 0        | 0        | 0        | 0        | 0        | 0.216565 | 0        | 0        |
| DAPK1-UPK3A   | 0.232445 | 0        | 0        | 0        | 0        | 0        | 0        | 0        | 0        | 0        |
| GADD45B-HMOX1 | 0        | 0        | 0        | 0        | 0.227391 | 0        | 0        | 0        | 0        | 0        |
| HIF1A-MET     | 0        | 0        | 0        | 0.333666 | 0        | 0        | 0        | 0        | 0        | 0        |
| BIRC5-SOS1    | 0        | 0        | 0.231027 | 0        | 0        | 0        | 0        | 0        | 0        | 0        |
| SPINT1-ZEB1   | 0        | 0        | 0        | 0        | 0        | 0.634769 | 0        | 0        | 0        | 0        |
| CDH1-MYC      | 0        | 0        | 0        | 0        | 0        | 0        | 0        | 0        | 0.261746 | 0        |
| BIRC5-SOS2    | 0        | 0        | 0.347957 | 0        | 0        | 0        | 0        | 0        | 0        | 0        |
| DVL2-WNT3     | 0        | 0.283775 | 0        | 0        | 0        | 0        | 0        | 0        | 0        | 0        |
| AXIN1-WNT9B   | 0        | 0        | 0        | 0        | 0        | 0        | 0        | 0.218274 | 0        | 0        |
| ESR2-FZD4     | 0        | 0.330465 | 0        | 0        | 0        | 0        | 0        | 0        | 0        | 0        |
| ESR2-FZD5     | 0        | 0.275249 | 0        | 0        | 0        | 0        | 0        | 0        | 0        | 0        |
| EGFR-GAB1     | 0        | 0        | 0        | 0        | 0        | 0        | 0        | 0.328686 | 0        | 0        |
| PIK3R2-WNT4   | 0        | 0.38639  | 0        | 0        | 0        | 0        | 0        | 0        | 0        | 0        |
| CDH1-JUP      | 0        | 0        | 0        | 0        | 0        | 0        | 0        | 0.517778 | 0        | 0        |
| JAK3-PIK3CD   | 0        | 0        | 0        | 0        | 0        | 0.802245 | 0        | 0        | 0        | 0        |
| APC2-NRAS     | 0        | 0        | 0.413719 | 0        | 0        | 0        | 0        | 0        | 0        | 0        |
| IL8-VEGFA     | 0.272228 | 0        | 0        | 0        | 0        | 0        | 0        | 0        | 0        | 0        |
| PDGFRB-TCF7L1 | 0        | 0        | 0        | 0        | 0        | 0        | 0.2276   | 0        | 0        | 0        |
| BRAF-NOTCH2   | 0        | 0.20468  | 0        | 0        | 0        | 0        | 0        | 0        | 0        | 0        |
| PDGFRB-SOS1   | 0        | 0        | 0        | 0        | 0        | 0.238282 | 0        | 0        | 0        | 0        |
| FGF8-WNT2B    | 0        | 0        | 0        | 0        | 0        | 0        | 0        | 0.29102  | 0        | 0        |
| BAK1-NTRK1    | 0        | 0        | 0        | 0        | 0        | 0        | 0        | 0        | 0.340249 | 0        |
| MLH1-TGFB2    | 0        | 0        | 0.299046 | 0        | 0        | 0        | 0        | 0        | 0        | 0        |
| ERG-GSTP1     | 0        | 0        | 0        | 0        | 0        | 0        | 0.375978 | 0        | 0        | 0        |
| E2F2-JUP      | 0        | 0        | 0        | 0        | 0        | 0        | 0        | 0.312933 | 0        | 0        |
| APC2-CCND1    | 0        | 0        | 0.33304  | 0        | 0        | 0        | 0        | 0        | 0        | 0        |
| FZD6-WNT9B    | 0        | 0        | 0        | 0        | 0        | 0        | 0        | 0.211723 | 0        | 0        |
| EGF-ILK       | 0        | 0        | 0        | 0        | 0        | 0        | 0        | 0        | 0.210237 | 0        |
| TP53-WNT6     | 0        | 0.21094  | 0        | 0        | 0        | 0        | 0        | 0        | 0        | 0        |
| HIF1A-TGFB2   | 0        | 0        | 0        | 0.575294 | 0        | 0        | 0        | 0        | 0        | 0        |
| SHC4-TERC     | 0        | 0        | 0        | 0        | 0        | 0        | 0        | 0.220484 | 0        | 0        |
| LRP6-NCOA3    | 0        | 0.227822 | 0        | 0        | 0        | 0        | 0        | 0        | 0        | 0        |
| JUN-MYC       | 0        | 0.347691 | 0        | 0        | 0        | 0        | 0        | 0        | 0        | 0        |
| PDGFRA-PDGFRB | 0        | 0        | 0        | 0        | 0        | 0        | 0.575302 | 0        | 0        | 0        |
| BAX-CDKN1A    | 0        | 0        | 0.26235  | 0        | 0        | 0        | 0        | 0        | 0        | 0        |
| APC2-DCC      | 0        | 0        | 0.373711 | 0        | 0        | 0        | 0        | 0        | 0        | 0        |
| HIF1A-PIK3R3  | 0        | 0        | 0        | 0.42519  | 0        | 0        | 0        | 0        | 0        | 0        |
| FZD4-FZD5     | 0        | 0.602973 | 0        | 0        | 0        | 0        | 0        | 0        | 0        | 0        |



|                 |          |          |          |          |          |          |          |          |          |          |
|-----------------|----------|----------|----------|----------|----------|----------|----------|----------|----------|----------|
| E2F1-TCF7L1     | 0        | 0        | 0        | 0        | 0.211978 | 0        | 0        | 0        | 0        | 0        |
| DAPK3-EGFR      | 0.600963 | 0        | 0        | 0        | 0        | 0        | 0        | 0        | 0        | 0        |
| FZD7-IGF1R      | 0        | 0        | 0        | 0        | 0.396828 | 0        | 0        | 0        | 0        | 0        |
| FGF22-WNT6      | 0        | 0        | 0        | 0        | 0        | 0        | 0        | 0.272538 | 0        | 0        |
| AKT3-ERG        | 0        | 0        | 0        | 0        | 0        | 0        | 0.200462 | 0        | 0        | 0        |
| TGFB3-WNT5B     | 0        | 0        | 0        | 0        | 0.253042 | 0        | 0        | 0        | 0        | 0        |
| CDKN1A-GSTA1    | 0        | 0        | 0        | 0        | 0.221196 | 0        | 0        | 0        | 0        | 0        |
| CDK6-KIT        | 0        | 0.276958 | 0        | 0        | 0        | 0        | 0        | 0        | 0        | 0        |
| BBC3-BCL2L11    | 0        | 0        | 0.287734 | 0        | 0        | 0        | 0        | 0        | 0        | 0        |
| E2F3-MMP9       | 0        | 0        | 0        | 0        | 0        | 0        | 0.265107 | 0        | 0        | 0        |
| PRKCB-TGFBR2    | 0        | 0        | 0        | 0        | 0.249993 | 0        | 0        | 0        | 0        | 0        |
| FZD10-GADD45G   | 0        | 0        | 0        | 0        | 0        | 0        | 0        | 0.279949 | 0        | 0        |
| FGFR3-RASSF1    | 0.223297 | 0        | 0        | 0        | 0        | 0        | 0        | 0        | 0        | 0        |
| APC-PIK3R1      | 0        | 0        | 0        | 0        | 0.283175 | 0        | 0        | 0        | 0        | 0        |
| GADD45G-HRAS    | 0        | 0        | 0        | 0        | 0        | 0.231402 | 0        | 0        | 0        | 0        |
| GSTA5-HGF       | 0        | 0        | 0        | 0        | 0.370308 | 0        | 0        | 0        | 0        | 0        |
| IGF1-SPINT1     | 0        | 0        | 0        | 0        | 0        | 0        | 0.287503 | 0        | 0        | 0        |
| PIK3CA-SHC2     | 0        | 0        | 0        | 0        | 0.29775  | 0        | 0        | 0        | 0        | 0        |
| LRP6-TGFB2      | 0        | 0        | 0        | 0        | 0        | 0        | 0        | 0.321439 | 0        | 0        |
| GADD45A-TP53    | 0        | 0        | 0        | 0        | 0        | 0        | 0        | 0        | 0.402192 | 0        |
| MYC-WNT9A       | 0        | 0        | 0        | 0        | 0        | 0        | 0        | 0.202714 | 0        | 0        |
| WNT1-WNT2B      | 0        | 0        | 0        | 0        | 0        | 0        | 0        | 0.210404 | 0        | 0        |
| EGF-GADD45G     | 0        | 0        | 0        | 0        | 0        | 0        | 0        | 0        | 0        | 0.262156 |
| AKT3-CDK6       | 0        | 0        | 0        | 0        | 0        | 0.461905 | 0        | 0        | 0        | 0        |
| HGF-NRAS        | 0        | 0        | 0        | 0.460844 | 0        | 0        | 0        | 0        | 0        | 0        |
| CDK4-E2F1       | 0.504318 | 0        | 0        | 0        | 0        | 0        | 0        | 0        | 0        | 0        |
| PIK3R2-TGFB2    | 0        | 0        | 0.354578 | 0        | 0        | 0        | 0        | 0        | 0        | 0        |
| HMOX1-SMARCC2   | 0        | 0        | 0        | 0        | 0.319077 | 0        | 0        | 0        | 0        | 0        |
| PAK7-PIK3R3     | 0        | 0        | 0        | 0.319177 | 0        | 0        | 0        | 0        | 0        | 0        |
| MAPK1-TYMP      | 0.388016 | 0        | 0        | 0        | 0        | 0        | 0        | 0        | 0        | 0        |
| JUP-SMAD3       | 0        | 0        | 0        | 0        | 0        | 0        | 0        | 0.339906 | 0        | 0        |
| MAPK3-TGFB2     | 0        | 0        | 0.291844 | 0        | 0        | 0        | 0        | 0        | 0        | 0        |
| AR-MAP2K2       | 0        | 0        | 0        | 0        | 0        | 0        | 0.243045 | 0        | 0        | 0        |
| CDH1-CDKN1B     | 0        | 0        | 0        | 0        | 0        | 0        | 0        | 0.253328 | 0        | 0        |
| EGFR-SP1        | 0        | 0.499816 | 0        | 0        | 0        | 0        | 0        | 0        | 0        | 0        |
| E2F2-WNT7A      | 0        | 0        | 0        | 0        | 0        | 0        | 0        | 0.286218 | 0        | 0        |
| MYC-PAX8        | 0        | 0        | 0        | 0        | 0        | 0        | 0        | 0        | 0.244783 | 0        |
| FGF2-WNT4       | 0        | 0.213342 | 0        | 0        | 0        | 0        | 0        | 0        | 0        | 0        |
| MAP2K2-WNT9B    | 0        | 0        | 0        | 0        | 0        | 0        | 0        | 0.202806 | 0        | 0        |
| CDH1-DAPK3      | 0.418746 | 0        | 0        | 0        | 0        | 0        | 0        | 0        | 0        | 0        |
| APC-SHH         | 0        | 0        | 0        | 0        | 0        | 0        | 0        | 0.225794 | 0        | 0        |
| RPS6KB2-TGFB2   | 0        | 0        | 0        | 0        | 0        | 0        | 0        | 0.389136 | 0        | 0        |
| E2F2-SRC        | 0.291929 | 0        | 0        | 0        | 0        | 0        | 0        | 0        | 0        | 0        |
| PRKCB-WNT7B     | 0        | 0        | 0        | 0        | 0.20279  | 0        | 0        | 0        | 0        | 0        |
| CDKN1A-VEGFA    | 0.444305 | 0        | 0        | 0        | 0        | 0        | 0        | 0        | 0        | 0        |
| LEF1-TCF7L1     | 0        | 0        | 0        | 0        | 0        | 0        | 0        | 0        | 0.419803 | 0        |
| DLL1-WNT6       | 0        | 0.2832   | 0        | 0        | 0        | 0        | 0        | 0        | 0        | 0        |
| HRAS-MMP2       | 0.625239 | 0        | 0        | 0        | 0        | 0        | 0        | 0        | 0        | 0        |
| APC2-PIK3R3     | 0        | 0        | 0.305233 | 0        | 0        | 0        | 0        | 0        | 0        | 0        |
| APC2-PIK3R2     | 0        | 0        | 0        | 0        | 0        | 0        | 0        | 0        | 0        | 0.519322 |
| BAK1-TCF7L2     | 0        | 0        | 0        | 0        | 0        | 0        | 0        | 0        | 0.43716  | 0        |
| EGFR-RPS6KB1    | 0        | 0.23784  | 0        | 0        | 0        | 0        | 0        | 0        | 0        | 0        |
| TGFB2-VEGFA     | 0        | 0        | 0        | 0.258959 | 0        | 0        | 0        | 0        | 0        | 0        |
| CDKN1A-HSP90AA1 | 0        | 0        | 0        | 0        | 0        | 0        | 0.224199 | 0        | 0        | 0        |
| DVL1-MAP2K2     | 0        | 0.678865 | 0        | 0        | 0        | 0        | 0        | 0        | 0        | 0        |
| FGFR2-WNT9A     | 0        | 0        | 0        | 0        | 0        | 0        | 0        | 0.219928 | 0        | 0        |
| FGF10-IGF1      | 0        | 0.41654  | 0        | 0        | 0        | 0        | 0        | 0        | 0        | 0        |

|                |          |          |          |   |          |   |          |          |   |          |   |
|----------------|----------|----------|----------|---|----------|---|----------|----------|---|----------|---|
| FGF10-NOTCH2   | 0        | 0.274742 | 0        | 0 | 0        | 0 | 0        | 0        | 0 | 0        | 0 |
| ABCB1-PIK3R1   | 0        | 0        | 0        | 0 | 0        | 0 | 0        | 0.237809 | 0 | 0        | 0 |
| MMP9-TYMP      | 0.227783 | 0        | 0        | 0 | 0        | 0 | 0        | 0        | 0 | 0        | 0 |
| FGF2-PTEN      | 0        | 0.37559  | 0        | 0 | 0        | 0 | 0        | 0        | 0 | 0        | 0 |
| FZD6-TGFB2     | 0        | 0        | 0        | 0 | 0.301957 | 0 | 0        | 0        | 0 | 0        | 0 |
| FGF17-TGFB3    | 0        | 0        | 0        | 0 | 0        | 0 | 0        | 0.210265 | 0 | 0        | 0 |
| E2F3-PIK3CD    | 0        | 0        | 0        | 0 | 0        | 0 | 0        | 0.431538 | 0 | 0        | 0 |
| APC-BRAF       | 0        | 0.223134 | 0        | 0 | 0        | 0 | 0        | 0        | 0 | 0        | 0 |
| EGFR-MAPK1     | 0.667522 | 0        | 0        | 0 | 0        | 0 | 0        | 0        | 0 | 0        | 0 |
| TERT-WNT9A     | 0        | 0        | 0        | 0 | 0        | 0 | 0        | 0.232533 | 0 | 0        | 0 |
| MMP2-UPK3A     | 0.340976 | 0        | 0        | 0 | 0        | 0 | 0        | 0        | 0 | 0        | 0 |
| AKT2-KIT       | 0        | 0.238975 | 0        | 0 | 0        | 0 | 0        | 0        | 0 | 0        | 0 |
| CREB3L1-PIK3R2 | 0        | 0        | 0        | 0 | 0        | 0 | 0.216662 | 0        | 0 | 0        | 0 |
| CDKN1A-PIK3CB  | 0        | 0        | 0        | 0 | 0        | 0 | 0        | 0        | 0 | 0.255828 | 0 |
| ESR1-TNFSF11   | 0        | 0.241926 | 0        | 0 | 0        | 0 | 0        | 0        | 0 | 0        | 0 |
| CREB3L1-PIK3R1 | 0        | 0        | 0        | 0 | 0        | 0 | 0.360255 | 0        | 0 | 0        | 0 |
| IGF1-PTEN      | 0        | 0        | 0        | 0 | 0        | 0 | 0.766538 | 0        | 0 | 0        | 0 |
| DAPK2-SRC      | 0.437758 | 0        | 0        | 0 | 0        | 0 | 0        | 0        | 0 | 0        | 0 |
| AREG-CYCS      | 0        | 0        | 0.315456 | 0 | 0        | 0 | 0        | 0        | 0 | 0        | 0 |
| EREG-TGFB3     | 0        | 0        | 0.247358 | 0 | 0        | 0 | 0        | 0        | 0 | 0        | 0 |
| FLT4-WNT9B     | 0        | 0.255375 | 0        | 0 | 0        | 0 | 0        | 0        | 0 | 0        | 0 |
| SHC4-TGFB2     | 0        | 0        | 0        | 0 | 0        | 0 | 0        | 0.254997 | 0 | 0        | 0 |
| KIT-PIK3R1     | 0        | 0.343351 | 0        | 0 | 0        | 0 | 0        | 0        | 0 | 0        | 0 |
| EGFR-TCF7L1    | 0        | 0        | 0        | 0 | 0        | 0 | 0        | 0        | 0 | 0.231769 | 0 |
| EGFR-TCF7L2    | 0        | 0        | 0.632006 | 0 | 0        | 0 | 0        | 0        | 0 | 0        | 0 |
| ABCB1-WNT9B    | 0        | 0        | 0        | 0 | 0        | 0 | 0        | 0.208259 | 0 | 0        | 0 |
| SMAD3-WNT3A    | 0        | 0        | 0        | 0 | 0        | 0 | 0        | 0.395171 | 0 | 0        | 0 |
| AKT3-TGFA      | 0        | 0        | 0.276802 | 0 | 0        | 0 | 0        | 0        | 0 | 0        | 0 |
| KRAS-VEGFA     | 0.320004 | 0        | 0        | 0 | 0        | 0 | 0        | 0        | 0 | 0        | 0 |
| GADD45B-TGFB1  | 0        | 0        | 0        | 0 | 0        | 0 | 0        | 0.392181 | 0 | 0        | 0 |
| CTNNA2-LEF1    | 0        | 0        | 0        | 0 | 0        | 0 | 0        | 0        | 0 | 0.398919 | 0 |
| DVL3-WNT9A     | 0        | 0        | 0        | 0 | 0        | 0 | 0        | 0.231254 | 0 | 0        | 0 |
| MAPK10-MAPK3   | 0        | 0        | 0.247329 | 0 | 0        | 0 | 0        | 0        | 0 | 0        | 0 |
| ERG-FGFR2      | 0        | 0        | 0        | 0 | 0        | 0 | 0.444015 | 0        | 0 | 0        | 0 |
| FGF1-GADD45B   | 0        | 0.211917 | 0        | 0 | 0        | 0 | 0        | 0        | 0 | 0        | 0 |
| PDGFC-SRD5A2   | 0        | 0        | 0        | 0 | 0        | 0 | 0.268861 | 0        | 0 | 0        | 0 |
| E2F3-ERG       | 0        | 0        | 0        | 0 | 0        | 0 | 0.211752 | 0        | 0 | 0        | 0 |
| CCNE1-ZEB1     | 0        | 0        | 0        | 0 | 0        | 0 | 0.233613 | 0        | 0 | 0        | 0 |
| LEF1-RAC2      | 0        | 0        | 0.475099 | 0 | 0        | 0 | 0        | 0        | 0 | 0        | 0 |
| APC2-CYCS      | 0        | 0        | 0.511408 | 0 | 0        | 0 | 0        | 0        | 0 | 0        | 0 |
| SMAD3-TCF7L2   | 0        | 0        | 0.444385 | 0 | 0        | 0 | 0        | 0        | 0 | 0        | 0 |
| CDH1-CDKN2B    | 0        | 0        | 0        | 0 | 0        | 0 | 0        | 0.327944 | 0 | 0        | 0 |
| FZD1-LEF1      | 0        | 0.23926  | 0        | 0 | 0        | 0 | 0        | 0        | 0 | 0        | 0 |
| TCF7L2-TGFB3   | 0        | 0        | 0        | 0 | 0.273169 | 0 | 0        | 0        | 0 | 0        | 0 |
| MAPK10-TCF7L1  | 0        | 0        | 0.278045 | 0 | 0        | 0 | 0        | 0        | 0 | 0        | 0 |
| APC-CTNNA3     | 0        | 0        | 0        | 0 | 0        | 0 | 0        | 0        | 0 | 0.552875 | 0 |
| PIK3CA-SHH     | 0        | 0        | 0        | 0 | 0        | 0 | 0        | 0.237166 | 0 | 0        | 0 |
| TCF7-TCF7L1    | 0        | 0        | 0        | 0 | 0        | 0 | 0        | 0        | 0 | 0.56786  | 0 |
| DVL1-FGF6      | 0        | 0.241834 | 0        | 0 | 0        | 0 | 0        | 0        | 0 | 0        | 0 |
| CSNK1A1-FGF1   | 0        | 0        | 0        | 0 | 0        | 0 | 0        | 0.21201  | 0 | 0        | 0 |
| AKT3-SOS2      | 0        | 0        | 0        | 0 | 0        | 0 | 0        | 0        | 0 | 0.218809 | 0 |
| POLK-SHC4      | 0        | 0        | 0        | 0 | 0        | 0 | 0        | 0.254095 | 0 | 0        | 0 |
| AKT3-FZD7      | 0        | 0        | 0        | 0 | 0        | 0 | 0        | 0.292733 | 0 | 0        | 0 |
| CCNE1-CDKN1A   | 0        | 0        | 0        | 0 | 0        | 0 | 0.272182 | 0        | 0 | 0        | 0 |
| CCND1-PIK3R1   | 0        | 0        | 0        | 0 | 0        | 0 | 0        | 0        | 0 | 0.218613 | 0 |
| FZD4-IGF1      | 0        | 0.210004 | 0        | 0 | 0        | 0 | 0        | 0        | 0 | 0        | 0 |
| ARAF-EGF       | 0        | 0        | 0        | 0 | 0        | 0 | 0.206889 | 0        | 0 | 0        | 0 |

|                |          |          |          |          |          |          |   |          |          |          |          |   |
|----------------|----------|----------|----------|----------|----------|----------|---|----------|----------|----------|----------|---|
| THBS1-TYMP     | 0.201932 | 0        | 0        | 0        | 0        | 0        | 0 | 0        | 0        | 0        | 0        | 0 |
| GAB1-PIK3CA    | 0        | 0        | 0        | 0        | 0        | 0        | 0 | 0        | 0.232259 | 0        | 0        | 0 |
| AR-MTOR        | 0        | 0        | 0        | 0        | 0        | 0        | 0 | 0.472356 | 0        | 0        | 0        | 0 |
| ETV5-PIK3R1    | 0        | 0        | 0        | 0        | 0        | 0        | 0 | 0.543257 | 0        | 0        | 0        | 0 |
| CCND1-FGFR1    | 0        | 0        | 0        | 0        | 0        | 0        | 0 | 0.274026 | 0        | 0        | 0        | 0 |
| CSNK1A1L-LEF1  | 0        | 0        | 0        | 0        | 0        | 0        | 0 | 0        | 0.283257 | 0        | 0        | 0 |
| AXIN1-WNT6     | 0        | 0.304349 | 0        | 0        | 0        | 0        | 0 | 0        | 0        | 0        | 0        | 0 |
| ERBB2-SPINT1   | 0        | 0        | 0        | 0        | 0        | 0        | 0 | 0.446768 | 0        | 0        | 0        | 0 |
| FGF9-MYC       | 0        | 0        | 0        | 0        | 0        | 0        | 0 | 0        | 0.248421 | 0        | 0        | 0 |
| FGF9-GADD45G   | 0        | 0        | 0        | 0        | 0        | 0        | 0 | 0        | 0.400907 | 0        | 0        | 0 |
| MGST1-NQO1     | 0        | 0        | 0        | 0        | 0.23785  | 0        | 0 | 0        | 0        | 0        | 0        | 0 |
| DVL3-EGFR      | 0        | 0        | 0        | 0        | 0        | 0        | 0 | 0        | 0.322162 | 0        | 0        | 0 |
| PAK3-PIK3CA    | 0        | 0        | 0        | 0.23351  | 0        | 0        | 0 | 0        | 0        | 0        | 0        | 0 |
| TGFB1-WNT6     | 0        | 0        | 0        | 0        | 0        | 0        | 0 | 0        | 0.324633 | 0        | 0        | 0 |
| CASP9-PDGFR    | 0        | 0        | 0        | 0        | 0        | 0        | 0 | 0.214317 | 0        | 0        | 0        | 0 |
| IGF1R-WNT9B    | 0        | 0        | 0        | 0        | 0.225052 | 0        | 0 | 0        | 0        | 0        | 0        | 0 |
| AREG-FOS       | 0        | 0        | 0.2701   | 0        | 0        | 0        | 0 | 0        | 0        | 0        | 0        | 0 |
| RARB-TGFB2     | 0        | 0        | 0        | 0        | 0        | 0        | 0 | 0        | 0.208174 | 0        | 0        | 0 |
| PDGFR-PIK3CA   | 0        | 0        | 0        | 0        | 0        | 0        | 0 | 0.425079 | 0        | 0        | 0        | 0 |
| GADD45B-STAT3  | 0        | 0        | 0        | 0        | 0        | 0.233153 | 0 | 0        | 0        | 0        | 0        | 0 |
| BAX-PIK3CA     | 0        | 0        | 0        | 0        | 0.200303 | 0        | 0 | 0        | 0        | 0        | 0        | 0 |
| ETV5-KLK3      | 0        | 0        | 0        | 0        | 0        | 0        | 0 | 0.204488 | 0        | 0        | 0        | 0 |
| KRAS-UPK3A     | 0.359791 | 0        | 0        | 0        | 0        | 0        | 0 | 0        | 0        | 0        | 0        | 0 |
| FGFR1-FOXO1    | 0        | 0        | 0        | 0        | 0        | 0        | 0 | 0.294702 | 0        | 0        | 0        | 0 |
| DVL1-WNT9A     | 0        | 0.223274 | 0        | 0        | 0        | 0        | 0 | 0        | 0        | 0        | 0        | 0 |
| ACTB-MYC       | 0        | 0        | 0        | 0        | 0.357324 | 0        | 0 | 0        | 0        | 0        | 0        | 0 |
| BAK1-TGFB1     | 0        | 0        | 0        | 0        | 0.546136 | 0        | 0 | 0        | 0        | 0        | 0        | 0 |
| HGF-PBRM1      | 0        | 0        | 0        | 0        | 0.342417 | 0        | 0 | 0        | 0        | 0        | 0        | 0 |
| BAX-TCF7       | 0        | 0        | 0        | 0        | 0        | 0        | 0 | 0        | 0.229225 | 0        | 0        | 0 |
| EGLN3-SLC2A1   | 0        | 0        | 0        | 0.454561 | 0        | 0        | 0 | 0        | 0        | 0        | 0        | 0 |
| FGF1-WNT5B     | 0        | 0.352192 | 0        | 0        | 0        | 0        | 0 | 0        | 0        | 0        | 0        | 0 |
| PIK3CD-PLCG1   | 0        | 0        | 0        | 0        | 0.395685 | 0        | 0 | 0        | 0        | 0        | 0        | 0 |
| PIK3R3-SLC2A1  | 0        | 0        | 0        | 0.221284 | 0        | 0        | 0 | 0        | 0        | 0        | 0        | 0 |
| FGF7-IGF1      | 0        | 0.306997 | 0        | 0        | 0        | 0        | 0 | 0        | 0        | 0        | 0        | 0 |
| E2F3-EML4      | 0        | 0        | 0        | 0        | 0        | 0.250277 | 0 | 0        | 0        | 0        | 0        | 0 |
| FZD1-SHC4      | 0        | 0.217709 | 0        | 0        | 0        | 0        | 0 | 0        | 0        | 0        | 0        | 0 |
| BRAF-NCOA3     | 0        | 0.232992 | 0        | 0        | 0        | 0        | 0 | 0        | 0        | 0        | 0        | 0 |
| CCNE2-TCF7L1   | 0        | 0        | 0        | 0        | 0        | 0        | 0 | 0.296376 | 0        | 0        | 0        | 0 |
| PRKCG-WNT5A    | 0        | 0        | 0        | 0        | 0.278066 | 0        | 0 | 0        | 0        | 0        | 0        | 0 |
| FGF2-RXRG      | 0        | 0        | 0        | 0        | 0        | 0        | 0 | 0        | 0.290093 | 0        | 0        | 0 |
| AXIN1-CDH1     | 0        | 0        | 0        | 0        | 0        | 0        | 0 | 0        | 0        | 0        | 0.202945 | 0 |
| ABCB1-CDK2     | 0        | 0        | 0        | 0        | 0        | 0        | 0 | 0        | 0.236701 | 0        | 0        | 0 |
| GADD45B-MTOR   | 0        | 0        | 0        | 0        | 0.366829 | 0        | 0 | 0        | 0        | 0        | 0        | 0 |
| FRAT1-GSTA2    | 0        | 0        | 0        | 0        | 0.204239 | 0        | 0 | 0        | 0        | 0        | 0        | 0 |
| BAX-POLK       | 0        | 0        | 0        | 0        | 0        | 0        | 0 | 0        | 0        | 0.699625 | 0        | 0 |
| CRK-HGF        | 0        | 0        | 0        | 0.331664 | 0        | 0        | 0 | 0        | 0        | 0        | 0        | 0 |
| BCL2L11-PIK3CB | 0        | 0        | 0.269436 | 0        | 0        | 0        | 0 | 0        | 0        | 0        | 0        | 0 |
| FGF2-FRAT2     | 0        | 0.332468 | 0        | 0        | 0        | 0        | 0 | 0        | 0        | 0        | 0        | 0 |
| PIK3R2-PIK3R3  | 0        | 0        | 0        | 0        | 0        | 0        | 0 | 0        | 0        | 0        | 0.303911 | 0 |
| HGF-TGFBR1     | 0        | 0        | 0        | 0        | 0.400553 | 0        | 0 | 0        | 0        | 0        | 0        | 0 |
| GSTM1-GSTM2    | 0        | 0        | 0        | 0        | 0.883369 | 0        | 0 | 0        | 0        | 0        | 0        | 0 |
| CDK6-WNT5A     | 0        | 0        | 0        | 0        | 0.214306 | 0        | 0 | 0        | 0        | 0        | 0        | 0 |
| EPAS1-ETS1     | 0        | 0        | 0        | 0.20818  | 0        | 0        | 0 | 0        | 0        | 0        | 0        | 0 |
| TCF7L1-TGFB2   | 0        | 0        | 0.535522 | 0        | 0        | 0        | 0 | 0        | 0        | 0        | 0        | 0 |
| CTNNA3-SOS2    | 0        | 0        | 0        | 0        | 0        | 0        | 0 | 0        | 0        | 0        | 0.455539 | 0 |
| APC2-RALGDS    | 0        | 0        | 0.37573  | 0        | 0        | 0        | 0 | 0        | 0        | 0        | 0        | 0 |
| HIF1A-VEGFA    | 0        | 0        | 0        | 0.363344 | 0        | 0        | 0 | 0        | 0        | 0        | 0        | 0 |

|                |          |          |          |          |          |          |          |          |          |          |
|----------------|----------|----------|----------|----------|----------|----------|----------|----------|----------|----------|
| CTNNA3-SOS1    | 0        | 0        | 0        | 0        | 0        | 0        | 0        | 0        | 0        | 0.352496 |
| APC2-MAPK8     | 0        | 0        | 0.309124 | 0        | 0        | 0        | 0        | 0        | 0        | 0        |
| AXIN2-PIK3CD   | 0        | 0        | 0        | 0        | 0        | 0        | 0        | 0        | 0        | 0.36692  |
| FGF20-TCF7     | 0        | 0        | 0        | 0        | 0        | 0        | 0        | 0.269277 | 0        | 0        |
| NTRK1-TCF7L1   | 0        | 0        | 0        | 0        | 0        | 0        | 0        | 0        | 0.203494 | 0        |
| E2F2-RB1       | 0.240365 | 0        | 0        | 0        | 0        | 0        | 0        | 0        | 0        | 0        |
| MGST1-WNT10A   | 0        | 0        | 0        | 0        | 0.228139 | 0        | 0        | 0        | 0        | 0        |
| DDB2-EGF       | 0        | 0        | 0        | 0        | 0        | 0        | 0        | 0        | 0        | 0.253845 |
| CREB5-PDGFRB   | 0        | 0        | 0        | 0        | 0        | 0        | 0.338649 | 0        | 0        | 0        |
| APC-HRAS       | 0        | 0        | 0        | 0        | 0        | 0        | 0        | 0        | 0        | 0.306798 |
| PLCG2-PRKCB    | 0        | 0        | 0        | 0        | 0        | 0.345577 | 0        | 0        | 0        | 0        |
| FZD10-TGFB1    | 0        | 0        | 0        | 0        | 0        | 0        | 0        | 0.21214  | 0        | 0        |
| BAX-MAPK1      | 0        | 0        | 0        | 0        | 0        | 0        | 0        | 0        | 0.234122 | 0        |
| EGF-GADD45B    | 0        | 0        | 0        | 0        | 0        | 0        | 0        | 0.207362 | 0        | 0        |
| EGFR-RB1       | 0.600106 | 0        | 0        | 0        | 0        | 0        | 0        | 0        | 0        | 0        |
| FGF3-WNT7A     | 0        | 0        | 0        | 0        | 0        | 0        | 0        | 0.346383 | 0        | 0        |
| EGF-KIT        | 0        | 0.299357 | 0        | 0        | 0        | 0        | 0        | 0        | 0        | 0        |
| POLK-RARB      | 0        | 0        | 0        | 0        | 0        | 0        | 0        | 0.282209 | 0        | 0        |
| BAD-HRAS       | 0        | 0        | 0        | 0        | 0        | 0        | 0        | 0        | 0        | 0.212604 |
| HMOX1-PIK3R2   | 0        | 0        | 0        | 0        | 0.419865 | 0        | 0        | 0        | 0        | 0        |
| TCF7-TPM3      | 0        | 0        | 0        | 0        | 0        | 0        | 0        | 0        | 0.227618 | 0        |
| AREG-MYC       | 0        | 0        | 0.311049 | 0        | 0        | 0        | 0        | 0        | 0        | 0        |
| ERBB2-FGF7     | 0        | 0        | 0        | 0        | 0        | 0        | 0        | 0.245763 | 0        | 0        |
| BAX-CDKN2A     | 0        | 0        | 0        | 0        | 0        | 0.205151 | 0        | 0        | 0        | 0        |
| PMAIP1-TGFB2   | 0        | 0        | 0.282556 | 0        | 0        | 0        | 0        | 0        | 0        | 0        |
| CTNNA2-GADD45A | 0        | 0        | 0        | 0        | 0        | 0        | 0        | 0        | 0        | 0.236885 |
| AXIN1-WNT3     | 0        | 0.392088 | 0        | 0        | 0        | 0        | 0        | 0        | 0        | 0        |
| BRAF-PIK3CA    | 0        | 0.396576 | 0        | 0        | 0        | 0        | 0        | 0        | 0        | 0        |
| PAK3-SOS1      | 0        | 0        | 0        | 0.217317 | 0        | 0        | 0        | 0        | 0        | 0        |
| CCND1-ERBB2    | 0.465101 | 0        | 0        | 0        | 0        | 0        | 0        | 0        | 0        | 0        |
| DLL1-HRAS      | 0        | 0.203685 | 0        | 0        | 0        | 0        | 0        | 0        | 0        | 0        |
| HBEGF-NRAS     | 0.213805 | 0        | 0        | 0        | 0        | 0        | 0        | 0        | 0        | 0        |
| JAK3-STAT5A    | 0        | 0        | 0        | 0        | 0        | 0.339924 | 0        | 0        | 0        | 0        |
| APC2-FZD5      | 0        | 0        | 0        | 0        | 0        | 0        | 0        | 0.278542 | 0        | 0        |
| AR-RB1         | 0        | 0        | 0        | 0        | 0        | 0        | 0.289402 | 0        | 0        | 0        |
| FZD3-HEY1      | 0        | 0.264301 | 0        | 0        | 0        | 0        | 0        | 0        | 0        | 0        |
| AXIN2-FZD8     | 0        | 0        | 0        | 0        | 0        | 0        | 0        | 0.329613 | 0        | 0        |
| PDGFRA-SPINT1  | 0        | 0        | 0        | 0        | 0        | 0        | 0.218965 | 0        | 0        | 0        |
| ETV5-INSRR     | 0        | 0        | 0        | 0        | 0        | 0        | 0.214216 | 0        | 0        | 0        |
| ESR2-PIK3CA    | 0        | 0.303464 | 0        | 0        | 0        | 0        | 0        | 0        | 0        | 0        |
| E2F1-PIK3R2    | 0        | 0        | 0        | 0        | 0.417188 | 0        | 0        | 0        | 0        | 0        |
| TERT-WNT5A     | 0        | 0        | 0        | 0        | 0.267773 | 0        | 0        | 0        | 0        | 0        |
| SHC2-SHC4      | 0        | 0        | 0        | 0        | 0.259674 | 0        | 0        | 0        | 0        | 0        |
| WNT11-WNT9B    | 0        | 0        | 0        | 0        | 0        | 0        | 0        | 0.546407 | 0        | 0        |
| MAPK10-TGFB3   | 0        | 0        | 0.376445 | 0        | 0        | 0        | 0        | 0        | 0        | 0        |
| RXRG-WNT6      | 0        | 0        | 0        | 0        | 0        | 0        | 0        | 0.238872 | 0        | 0        |
| CDKN2A-FZD10   | 0        | 0        | 0        | 0        | 0.235069 | 0        | 0        | 0        | 0        | 0        |
| FZD5-WNT7A     | 0        | 0        | 0        | 0        | 0        | 0        | 0        | 0.451272 | 0        | 0        |
| EGF-MAPK3      | 0        | 0.223993 | 0        | 0        | 0        | 0        | 0        | 0        | 0        | 0        |
| RPS6KA5-VEGFA  | 0.270143 | 0        | 0        | 0        | 0        | 0        | 0        | 0        | 0        | 0        |
| EGF-MAPK1      | 0        | 0        | 0        | 0        | 0        | 0        | 0        | 0        | 0        | 0.242362 |
| PAK2-TGFB2     | 0        | 0        | 0        | 0.447206 | 0        | 0        | 0        | 0        | 0        | 0        |
| E2F3-TERT      | 0        | 0        | 0        | 0        | 0        | 0        | 0        | 0.203225 | 0        | 0        |
| WNT11-WNT3     | 0        | 0        | 0        | 0        | 0        | 0        | 0        | 0.283957 | 0        | 0        |
| MYC-WNT7A      | 0        | 0        | 0        | 0        | 0        | 0        | 0        | 0.244773 | 0        | 0        |
| BRAF-CDKN1A    | 0        | 0        | 0        | 0        | 0        | 0.214374 | 0        | 0        | 0        | 0        |
| FZD4-PIK3R3    | 0        | 0        | 0        | 0        | 0        | 0        | 0        | 0.30704  | 0        | 0        |



|                |          |          |          |          |          |          |          |          |          |          |   |
|----------------|----------|----------|----------|----------|----------|----------|----------|----------|----------|----------|---|
| FZD4-PIK3R2    | 0        | 0.22517  | 0        | 0        | 0        | 0        | 0        | 0        | 0        | 0        | 0 |
| FZD4-PIK3R1    | 0        | 0        | 0        | 0        | 0        | 0        | 0        | 0.226804 | 0        | 0        | 0 |
| CDKN1A-SMARCD2 | 0        | 0        | 0        | 0        | 0.307099 | 0        | 0        | 0        | 0        | 0        | 0 |
| EGFR-EP300     | 0        | 0        | 0        | 0        | 0        | 0        | 0.408155 | 0        | 0        | 0        | 0 |
| ABCB1-SOS1     | 0        | 0        | 0        | 0        | 0        | 0        | 0        | 0.239398 | 0        | 0        | 0 |
| FGFR2-TGFBR1   | 0        | 0        | 0        | 0        | 0        | 0        | 0        | 0.266241 | 0        | 0        | 0 |
| GSTP1-PLAU     | 0        | 0        | 0        | 0        | 0        | 0        | 0.316313 | 0        | 0        | 0        | 0 |
| THBS1-TP53     | 0.272284 | 0        | 0        | 0        | 0        | 0        | 0        | 0        | 0        | 0        | 0 |
| APC-LRP6       | 0        | 0.31302  | 0        | 0        | 0        | 0        | 0        | 0        | 0        | 0        | 0 |
| JUP-WNT3A      | 0        | 0        | 0        | 0        | 0        | 0        | 0        | 0.225164 | 0        | 0        | 0 |
| APC-GAB1       | 0        | 0        | 0        | 0        | 0        | 0        | 0        | 0.250511 | 0        | 0        | 0 |
| CDKN1A-LEF1    | 0        | 0        | 0        | 0        | 0        | 0        | 0        | 0        | 0        | 0.375591 | 0 |
| E2F2-PRKCB     | 0        | 0        | 0        | 0        | 0        | 0.262058 | 0        | 0        | 0        | 0        | 0 |
| GSTA4-GSTM3    | 0        | 0        | 0        | 0        | 0.218749 | 0        | 0        | 0        | 0        | 0        | 0 |
| CDH17-TGFB1    | 0        | 0        | 0        | 0        | 0        | 0        | 0        | 0.221617 | 0        | 0        | 0 |
| MMP9-MYC       | 0.278133 | 0        | 0        | 0        | 0        | 0        | 0        | 0        | 0        | 0        | 0 |
| CTNNA3-ILK     | 0        | 0        | 0        | 0        | 0        | 0        | 0        | 0        | 0        | 0.397331 | 0 |
| FGF2-FGF6      | 0        | 0.379002 | 0        | 0        | 0        | 0        | 0        | 0        | 0        | 0        | 0 |
| FGF2-FGF7      | 0        | 0        | 0        | 0        | 0        | 0        | 0        | 0.224244 | 0        | 0        | 0 |
| WNT10A-WNT4    | 0        | 0        | 0        | 0        | 0        | 0        | 0        | 0.856979 | 0        | 0        | 0 |
| AXIN2-LRP6     | 0        | 0        | 0        | 0        | 0        | 0        | 0        | 0.352    | 0        | 0        | 0 |
| FGF7-HGF       | 0        | 0        | 0        | 0        | 0        | 0        | 0        | 0.311834 | 0        | 0        | 0 |
| MAPK3-PAK7     | 0        | 0        | 0        | 0.293949 | 0        | 0        | 0        | 0        | 0        | 0        | 0 |
| FGF16-FGF9     | 0        | 0.293962 | 0        | 0        | 0        | 0        | 0        | 0        | 0        | 0        | 0 |
| PDGFRA-PIK3CD  | 0        | 0        | 0        | 0        | 0        | 0        | 0.21582  | 0        | 0        | 0        | 0 |
| EGFR-SMARCD3   | 0        | 0        | 0        | 0        | 0.219212 | 0        | 0        | 0        | 0        | 0        | 0 |
| AKT3-HGF       | 0        | 0        | 0        | 0        | 0.629438 | 0        | 0        | 0        | 0        | 0        | 0 |
| RXRG-TGFB3     | 0        | 0        | 0        | 0        | 0        | 0        | 0        | 0.307307 | 0        | 0        | 0 |
| APC2-TGFBR2    | 0        | 0        | 0.267471 | 0        | 0        | 0        | 0        | 0        | 0        | 0        | 0 |
| FZD7-SHC3      | 0        | 0        | 0        | 0        | 0        | 0        | 0        | 0.26341  | 0        | 0        | 0 |
| HRAS-KRAS      | 0        | 0.535236 | 0        | 0        | 0        | 0        | 0        | 0        | 0        | 0        | 0 |
| BRAF-VEGFA     | 0.529511 | 0        | 0        | 0        | 0        | 0        | 0        | 0        | 0        | 0        | 0 |
| PTEN-SRD5A2    | 0        | 0        | 0        | 0        | 0        | 0        | 0.324218 | 0        | 0        | 0        | 0 |
| FGF20-WNT16    | 0        | 0        | 0        | 0        | 0        | 0        | 0        | 0.238865 | 0        | 0        | 0 |
| E2F3-RXRG      | 0        | 0        | 0        | 0        | 0        | 0.291315 | 0        | 0        | 0        | 0        | 0 |
| AR-EP300       | 0        | 0        | 0        | 0        | 0        | 0        | 0.475599 | 0        | 0        | 0        | 0 |
| HEYL-IGF1      | 0        | 0.339035 | 0        | 0        | 0        | 0        | 0        | 0        | 0        | 0        | 0 |
| TGFB1-TGFB3    | 0        | 0        | 0        | 0.289113 | 0        | 0        | 0        | 0        | 0        | 0        | 0 |
| HRAS-PDGFRA    | 0        | 0        | 0        | 0        | 0        | 0        | 0.242401 | 0        | 0        | 0        | 0 |
| FZD9-SHC3      | 0        | 0        | 0        | 0        | 0        | 0        | 0        | 0.238497 | 0        | 0        | 0 |
| BCL2L11-TCF7L2 | 0        | 0        | 0.668687 | 0        | 0        | 0        | 0        | 0        | 0        | 0        | 0 |
| EGF-TMPRSS2    | 0        | 0        | 0        | 0        | 0        | 0        | 0.276341 | 0        | 0        | 0        | 0 |
| HRAS-POLK      | 0        | 0        | 0        | 0        | 0        | 0        | 0        | 0        | 0.543053 | 0        | 0 |
| FGF19-WNT8A    | 0        | 0        | 0        | 0        | 0        | 0        | 0        | 0.303849 | 0        | 0        | 0 |
| FGFR2-PIK3CD   | 0        | 0        | 0        | 0        | 0        | 0        | 0.349245 | 0        | 0        | 0        | 0 |
| BAX-CDH1       | 0        | 0        | 0        | 0        | 0        | 0        | 0        | 0        | 0.343679 | 0        | 0 |
| SHC2-WNT6      | 0        | 0.2648   | 0        | 0        | 0        | 0        | 0        | 0        | 0        | 0        | 0 |
| HRAS-WNT7B     | 0        | 0        | 0        | 0        | 0        | 0        | 0        | 0.296655 | 0        | 0        | 0 |
| DDB2-WNT6      | 0        | 0.333317 | 0        | 0        | 0        | 0        | 0        | 0        | 0        | 0        | 0 |
| DDB2-WNT4      | 0        | 0        | 0        | 0        | 0.324536 | 0        | 0        | 0        | 0        | 0        | 0 |
| TCF7-WNT1      | 0        | 0        | 0        | 0        | 0.349147 | 0        | 0        | 0        | 0        | 0        | 0 |
| EGF-LRP5       | 0        | 0        | 0        | 0        | 0        | 0        | 0        | 0.291853 | 0        | 0        | 0 |
| TMPRSS2-ZEB1   | 0        | 0        | 0        | 0        | 0        | 0        | 0.224658 | 0        | 0        | 0        | 0 |
| LEF1-PAX8      | 0        | 0        | 0        | 0        | 0        | 0        | 0        | 0        | 0.23077  | 0        | 0 |
| BAK1-TGFB2     | 0        | 0        | 0        | 0        | 0        | 0        | 0        | 0.286357 | 0        | 0        | 0 |
| E2F1-GADD45A   | 0        | 0        | 0        | 0        | 0.208409 | 0        | 0        | 0        | 0        | 0        | 0 |
| IGF1-SRD5A2    | 0        | 0        | 0        | 0        | 0        | 0        | 0.340752 | 0        | 0        | 0        | 0 |

|               |          |          |          |          |          |          |          |          |   |   |
|---------------|----------|----------|----------|----------|----------|----------|----------|----------|---|---|
| CDX2-FRAT2    | 0        | 0        | 0        | 0        | 0        | 0        | 0        | 0.294757 | 0 | 0 |
| EGF-MAP2K2    | 0        | 0        | 0        | 0        | 0        | 0        | 0        | 0.300648 | 0 | 0 |
| AXIN1-TERT    | 0        | 0        | 0        | 0        | 0        | 0        | 0        | 0.353846 | 0 | 0 |
| BAK1-E2F2     | 0        | 0        | 0        | 0        | 0        | 0.216241 | 0        | 0        | 0 | 0 |
| WNT2B-WNT4    | 0        | 0        | 0        | 0        | 0        | 0        | 0        | 0.325892 | 0 | 0 |
| BAK1-E2F1     | 0        | 0.223842 | 0        | 0        | 0        | 0        | 0        | 0        | 0 | 0 |
| CCNE1-ERG     | 0        | 0        | 0        | 0        | 0        | 0        | 0.282308 | 0        | 0 | 0 |
| E2F2-PDGFD    | 0        | 0        | 0        | 0        | 0        | 0        | 0.240653 | 0        | 0 | 0 |
| RB1-WNT7A     | 0        | 0        | 0        | 0        | 0        | 0        | 0        | 0.235072 | 0 | 0 |
| BAK1-HMOX1    | 0        | 0        | 0        | 0        | 0.331096 | 0        | 0        | 0        | 0 | 0 |
| E2F2-PDGFA    | 0        | 0        | 0        | 0        | 0        | 0        | 0.247609 | 0        | 0 | 0 |
| PAK4-PIK3CA   | 0        | 0        | 0        | 0.207777 | 0        | 0        | 0        | 0        | 0 | 0 |
| HGF-SOS1      | 0        | 0        | 0        | 0.340607 | 0        | 0        | 0        | 0        | 0 | 0 |
| KLK3-SOS2     | 0        | 0        | 0        | 0        | 0        | 0        | 0.248    | 0        | 0 | 0 |
| JUP-PIK3R2    | 0        | 0        | 0        | 0        | 0        | 0        | 0        | 0.354804 | 0 | 0 |
| FGF7-SHC4     | 0        | 0        | 0        | 0        | 0        | 0        | 0        | 0.249771 | 0 | 0 |
| CDKN1A-FZD4   | 0        | 0        | 0        | 0        | 0.414026 | 0        | 0        | 0        | 0 | 0 |
| CCNE2-RXRA    | 0        | 0        | 0        | 0        | 0        | 0        | 0        | 0.262783 | 0 | 0 |
| MAP2K2-PAK4   | 0        | 0        | 0        | 0.202437 | 0        | 0        | 0        | 0        | 0 | 0 |
| GADD45B-PLCG1 | 0        | 0        | 0        | 0        | 0.268536 | 0        | 0        | 0        | 0 | 0 |
| BAX-NFKB2     | 0        | 0.276097 | 0        | 0        | 0        | 0        | 0        | 0        | 0 | 0 |
| FRAT1-FZD10   | 0        | 0        | 0        | 0        | 0        | 0        | 0        | 0.325432 | 0 | 0 |
| CTNNB1-WNT8B  | 0        | 0.218621 | 0        | 0        | 0        | 0        | 0        | 0        | 0 | 0 |
| FRAT2-WNT10A  | 0        | 0        | 0        | 0        | 0        | 0        | 0        | 0.260114 | 0 | 0 |
| CCNE1-FGF9    | 0        | 0        | 0        | 0        | 0        | 0        | 0        | 0.3249   | 0 | 0 |
| APC-APC2      | 0        | 0        | 0.354351 | 0        | 0        | 0        | 0        | 0        | 0 | 0 |
| FGF23-FGF4    | 0        | 0        | 0        | 0        | 0        | 0        | 0        | 0.344826 | 0 | 0 |
| GSTA4-PRKCG   | 0        | 0        | 0        | 0        | 0.223649 | 0        | 0        | 0        | 0 | 0 |
| GSTM4-TGFB3   | 0        | 0        | 0        | 0        | 0.209727 | 0        | 0        | 0        | 0 | 0 |
| WNT11-WNT16   | 0        | 0        | 0        | 0        | 0        | 0        | 0        | 0.206483 | 0 | 0 |
| SHC3-SHC4     | 0        | 0        | 0        | 0        | 0        | 0        | 0        | 0.26989  | 0 | 0 |
| BRAF-CDKN2A   | 0.269661 | 0        | 0        | 0        | 0        | 0        | 0        | 0        | 0 | 0 |
| CDH1-FGF19    | 0        | 0        | 0        | 0        | 0        | 0        | 0        | 0.259991 | 0 | 0 |
| MYC-THBS1     | 0.756668 | 0        | 0        | 0        | 0        | 0        | 0        | 0        | 0 | 0 |
| BRCA2-POLK    | 0        | 0.208289 | 0        | 0        | 0        | 0        | 0        | 0        | 0 | 0 |
| FGFR1-PDGFRB  | 0        | 0        | 0        | 0        | 0        | 0        | 0.693276 | 0        | 0 | 0 |
| ESR1-WNT5A    | 0        | 0.321805 | 0        | 0        | 0        | 0        | 0        | 0        | 0 | 0 |
| FZD3-FZD7     | 0        | 0.287914 | 0        | 0        | 0        | 0        | 0        | 0        | 0 | 0 |
| FZD3-FZD6     | 0        | 0        | 0        | 0        | 0.373723 | 0        | 0        | 0        | 0 | 0 |
| ESR2-PTEN     | 0        | 0.278544 | 0        | 0        | 0        | 0        | 0        | 0        | 0 | 0 |
| FGF19-WNT9B   | 0        | 0        | 0        | 0        | 0        | 0        | 0        | 0.360625 | 0 | 0 |
| CDH1-EGF      | 0.223583 | 0        | 0        | 0        | 0        | 0        | 0        | 0        | 0 | 0 |
| LEF1-SHC4     | 0        | 0.272347 | 0        | 0        | 0        | 0        | 0        | 0        | 0 | 0 |
| AR-CTNNB1     | 0        | 0        | 0        | 0        | 0        | 0        | 0.204811 | 0        | 0 | 0 |
| FZD4-PRKCA    | 0        | 0        | 0        | 0        | 0.411207 | 0        | 0        | 0        | 0 | 0 |
| E2F3-EGFR     | 0.524417 | 0        | 0        | 0        | 0        | 0        | 0        | 0        | 0 | 0 |
| HGF-RB1       | 0        | 0        | 0        | 0        | 0.521978 | 0        | 0        | 0        | 0 | 0 |
| CDKN1A-CDX2   | 0        | 0        | 0        | 0        | 0        | 0        | 0        | 0.260874 | 0 | 0 |
| FGFR2-WNT3A   | 0        | 0        | 0        | 0        | 0        | 0        | 0        | 0.238399 | 0 | 0 |
| CCNE2-GSTP1   | 0        | 0        | 0        | 0        | 0        | 0        | 0.274551 | 0        | 0 | 0 |
| EGFR-WNT7B    | 0        | 0        | 0        | 0        | 0        | 0        | 0        | 0.254408 | 0 | 0 |
| HGF-PAK4      | 0        | 0        | 0        | 0.509678 | 0        | 0        | 0        | 0        | 0 | 0 |
| BCL2-ERBB2    | 0        | 0        | 0        | 0        | 0        | 0        | 0.329061 | 0        | 0 | 0 |
| PIK3CD-WNT10B | 0        | 0        | 0        | 0        | 0.265426 | 0        | 0        | 0        | 0 | 0 |
| FLCN-HIF1A    | 0        | 0        | 0        | 0.418806 | 0        | 0        | 0        | 0        | 0 | 0 |
| FZD10-WNT5A   | 0        | 0        | 0        | 0        | 0        | 0        | 0        | 0.290389 | 0 | 0 |
| EGF-FZD8      | 0        | 0        | 0        | 0        | 0        | 0        | 0        | 0.250302 | 0 | 0 |





|                |          |          |          |          |          |   |          |          |          |          |
|----------------|----------|----------|----------|----------|----------|---|----------|----------|----------|----------|
| HGF-TGFB1      | 0        | 0        | 0        | 0        | 0.200579 | 0 | 0        | 0        | 0        | 0        |
| AR-GSK3B       | 0        | 0        | 0        | 0        | 0        | 0 | 0.402521 | 0        | 0        | 0        |
| LEF1-TGFB1     | 0        | 0        | 0        | 0        | 0        | 0 | 0        | 0.263395 | 0        | 0        |
| HGF-TGFB2      | 0        | 0        | 0        | 0        | 0        | 0 | 0        | 0.268846 | 0        | 0        |
| LRP5-SHH       | 0        | 0        | 0        | 0        | 0        | 0 | 0        | 0.278779 | 0        | 0        |
| MAPK10-TCF7L2  | 0        | 0        | 0.211632 | 0        | 0        | 0 | 0        | 0        | 0        | 0        |
| FH-PAK3        | 0        | 0        | 0        | 0.288165 | 0        | 0 | 0        | 0        | 0        | 0        |
| CDK6-MTOR      | 0        | 0        | 0        | 0        | 0.237337 | 0 | 0        | 0        | 0        | 0        |
| BRCA1-BRCA2    | 0        | 0.861477 | 0        | 0        | 0        | 0 | 0        | 0        | 0        | 0        |
| AR-PDPK1       | 0        | 0        | 0        | 0        | 0        | 0 | 0.469439 | 0        | 0        | 0        |
| LEF1-WNT5A     | 0        | 0        | 0        | 0        | 0        | 0 | 0        | 0.286074 | 0        | 0        |
| AKT3-AXIN2     | 0        | 0        | 0        | 0        | 0        | 0 | 0        | 0        | 0        | 0.44474  |
| CTNNA3-MAP2K1  | 0        | 0        | 0        | 0        | 0        | 0 | 0        | 0        | 0        | 0.693266 |
| CDH1-NRAS      | 0.301344 | 0        | 0        | 0        | 0        | 0 | 0        | 0        | 0        | 0        |
| TGFB1-WNT10A   | 0        | 0        | 0        | 0        | 0        | 0 | 0        | 0.204869 | 0        | 0        |
| FGF10-HRAS     | 0        | 0        | 0        | 0        | 0        | 0 | 0        | 0.221663 | 0        | 0        |
| EGF-MMP1       | 0.268355 | 0        | 0        | 0        | 0        | 0 | 0        | 0        | 0        | 0        |
| RPS6KA5-THBS1  | 0.207165 | 0        | 0        | 0        | 0        | 0 | 0        | 0        | 0        | 0        |
| FZD2-WNT3A     | 0        | 0        | 0        | 0        | 0        | 0 | 0        | 0.20248  | 0        | 0        |
| PAK7-SOS2      | 0        | 0        | 0        | 0.313512 | 0        | 0 | 0        | 0        | 0        | 0        |
| GADD45G-NRAS   | 0        | 0.236242 | 0        | 0        | 0        | 0 | 0        | 0        | 0        | 0        |
| GADD45A-MYC    | 0        | 0        | 0        | 0        | 0        | 0 | 0        | 0        | 0.384056 | 0        |
| EGFR-FZD1      | 0        | 0        | 0        | 0        | 0        | 0 | 0        | 0.368989 | 0        | 0        |
| GSTO1-NQO1     | 0        | 0        | 0        | 0        | 0.234796 | 0 | 0        | 0        | 0        | 0        |
| BRCA2-NOTCH2   | 0        | 0.203309 | 0        | 0        | 0        | 0 | 0        | 0        | 0        | 0        |
| PIK3CB-TGFB2   | 0        | 0        | 0.28222  | 0        | 0        | 0 | 0        | 0        | 0        | 0        |
| EGF-HRAS       | 0.257685 | 0        | 0        | 0        | 0        | 0 | 0        | 0        | 0        | 0        |
| ARAF-ERG       | 0        | 0        | 0        | 0        | 0        | 0 | 0.213359 | 0        | 0        | 0        |
| FZD7-WNT6      | 0        | 0.215784 | 0        | 0        | 0        | 0 | 0        | 0        | 0        | 0        |
| CTNNA3-POLK    | 0        | 0        | 0        | 0        | 0        | 0 | 0        | 0        | 0        | 0.298847 |
| WNT10B-WNT5A   | 0        | 0        | 0        | 0        | 0        | 0 | 0        | 0.243376 | 0        | 0        |
| PIK3R1-SMARCA2 | 0        | 0        | 0        | 0        | 0.241296 | 0 | 0        | 0        | 0        | 0        |
| FZD6-MAP2K2    | 0        | 0        | 0        | 0        | 0        | 0 | 0        | 0.259823 | 0        | 0        |
| CTNNA2-FZD9    | 0        | 0        | 0        | 0        | 0        | 0 | 0        | 0.445892 | 0        | 0        |
| GSTA1-WNT5B    | 0        | 0        | 0        | 0        | 0.482352 | 0 | 0        | 0        | 0        | 0        |
| GSK3B-GSTP1    | 0        | 0        | 0        | 0        | 0        | 0 | 0.220766 | 0        | 0        | 0        |
| CDKN1A-RAPGEF1 | 0        | 0        | 0        | 0.204426 | 0        | 0 | 0        | 0        | 0        | 0        |
| JAG2-WNT6      | 0        | 0.654684 | 0        | 0        | 0        | 0 | 0        | 0        | 0        | 0        |
| GSTA2-GSTA4    | 0        | 0        | 0        | 0        | 0.200585 | 0 | 0        | 0        | 0        | 0        |
| HRAS-RPS6KA5   | 0.391954 | 0        | 0        | 0        | 0        | 0 | 0        | 0        | 0        | 0        |
| CTNNA2-RXRG    | 0        | 0        | 0        | 0        | 0        | 0 | 0        | 0.270396 | 0        | 0        |
| MAP2K2-RPS6KB2 | 0        | 0.268361 | 0        | 0        | 0        | 0 | 0        | 0        | 0        | 0        |
| PMAIP1-RAC2    | 0        | 0        | 0.326744 | 0        | 0        | 0 | 0        | 0        | 0        | 0        |
| CREB3L4-TCF7L1 | 0        | 0        | 0        | 0        | 0        | 0 | 0.301423 | 0        | 0        | 0        |
| BCL2L1-CDKN1A  | 0        | 0        | 0        | 0        | 0.385519 | 0 | 0        | 0        | 0        | 0        |
| CTNNA3-TCF7L1  | 0        | 0        | 0        | 0        | 0        | 0 | 0        | 0        | 0        | 0.305001 |
| DDB2-WNT7A     | 0        | 0        | 0        | 0        | 0        | 0 | 0        | 0.418406 | 0        | 0        |
| CCND1-JUP      | 0        | 0        | 0        | 0        | 0        | 0 | 0        | 0.342147 | 0        | 0        |
| ARID2-GADD45G  | 0        | 0        | 0        | 0        | 0.319922 | 0 | 0        | 0        | 0        | 0        |
| BCL2L11-TGFA   | 0        | 0        | 0.505937 | 0        | 0        | 0 | 0        | 0        | 0        | 0        |
| FZD6-WNT3      | 0        | 0        | 0        | 0        | 0.200448 | 0 | 0        | 0        | 0        | 0        |
| FZD9-WNT11     | 0        | 0.266201 | 0        | 0        | 0        | 0 | 0        | 0        | 0        | 0        |
| IGF1R-PRKCB    | 0        | 0        | 0        | 0        | 0.298184 | 0 | 0        | 0        | 0        | 0        |
| LEF1-PPARG     | 0        | 0        | 0        | 0        | 0        | 0 | 0        | 0        | 0.274619 | 0        |
| DVL1-FZD9      | 0        | 0.306796 | 0        | 0        | 0        | 0 | 0        | 0        | 0        | 0        |
| APC2-FOXO3     | 0        | 0        | 0        | 0        | 0        | 0 | 0        | 0        | 0        | 0.274988 |
| APC2-TGFB1     | 0        | 0        | 0.295465 | 0        | 0        | 0 | 0        | 0        | 0        | 0        |
